# Supplementary material for: Labour market attachment after mild traumatic brain injury: nationwide cohort study with 5-year register follow-up in Denmark
Source: PubMed Central journal article supplement — BMJ Open. 2019 Apr 11;9(4):e026104. doi: 10.1136/bmjopen-2018-026104 (PMC6500196; doi:10.1136/bmjopen-2018-026104), 2019-04-11
Supplement: bmjopen-2018-026104.draft_revisions.pdf [file bmjopen-2018-026104.draft_revisions.pdf]

# BMJ Open

BMJ Open is committed to open peer review. As part of this commitment we make the peer review history of every article we publish publicly available.

When an article is published we post the peer reviewers' comments and the authors' responses online. We also post the versions of the paper that were used during peer review. These are the versions that the peer review comments apply to.

The versions of the paper that follow are the versions that were submitted during the peer review process. They are not the versions of record or the final published versions. They should not be cited or distributed as the published version of this manuscript.

BMJ Open is an open access journal and the full, final, typeset and author-corrected version of record of the manuscript is available on our site with no access controls, subscription charges or pay-per-view fees (<http://bmjopen.bmj.com>).

If you have any questions on BMJ Open's open peer review process please email [info.bmjopen@bmj.com](mailto:info.bmjopen@bmj.com)

# BMJ Open

## Labour market attachment after mild traumatic brain injury: Nationwide cohort study with 5-year register follow-up

|                               |                                                                                                                                                                                                                                                                                                                                                                                                                                                                                                                                                                                                                                                                                                                                                                                                                                                                                                                                                                                                                                                                                                                                             |
|-------------------------------|---------------------------------------------------------------------------------------------------------------------------------------------------------------------------------------------------------------------------------------------------------------------------------------------------------------------------------------------------------------------------------------------------------------------------------------------------------------------------------------------------------------------------------------------------------------------------------------------------------------------------------------------------------------------------------------------------------------------------------------------------------------------------------------------------------------------------------------------------------------------------------------------------------------------------------------------------------------------------------------------------------------------------------------------------------------------------------------------------------------------------------------------|
| Journal:                      | <i>BMJ Open</i>                                                                                                                                                                                                                                                                                                                                                                                                                                                                                                                                                                                                                                                                                                                                                                                                                                                                                                                                                                                                                                                                                                                             |
| Manuscript ID                 | bmjopen-2018-026104                                                                                                                                                                                                                                                                                                                                                                                                                                                                                                                                                                                                                                                                                                                                                                                                                                                                                                                                                                                                                                                                                                                         |
| Article Type:                 | Research                                                                                                                                                                                                                                                                                                                                                                                                                                                                                                                                                                                                                                                                                                                                                                                                                                                                                                                                                                                                                                                                                                                                    |
| Date Submitted by the Author: | 17-Aug-2018                                                                                                                                                                                                                                                                                                                                                                                                                                                                                                                                                                                                                                                                                                                                                                                                                                                                                                                                                                                                                                                                                                                                 |
| Complete List of Authors:     | <p>Graff, Heidi; University Hospital Rigshospitalet, Department of Anaesthesia, 4231, Centre of Head and Orthopaedics</p> <p>Siersma, Volkert; University of Copenhagen, Department of Public Health, The Research Unit for General Practice and Section of General Practice, University of Copenhagen, Denmark</p> <p>Møller, Anne; Copenhagen University Hospital Holbæk, Department of Occupational Medicine; University of Copenhagen, Department of Public Health, The Research Unit for General Practice and Section of General Practice, University of Copenhagen, Denmark</p> <p>Kragstrup, Jakob; University of Copenhagen, Department of Public Health, The Research Unit for General Practice and Section of General Practice</p> <p>Andersen, Lars; National Research Centre for the Working Environment; Aalborg University, Sport Sciences, Department of Health Science and Technology</p> <p>Egerod, Ingrid; University of Copenhagen, Intensive Care Unit, Rigshospitalet</p> <p>Malá, Hana; University of Copenhagen, Department of Psychology; University Hospital Bispebjerg-Frederiksberg, Department of Neurology</p> |
| Keywords:                     | Labour market attachment, Mild traumatic brain injury, Sickness absence, Post-concussive symptoms, Unemployment                                                                                                                                                                                                                                                                                                                                                                                                                                                                                                                                                                                                                                                                                                                                                                                                                                                                                                                                                                                                                             |
|                               |                                                                                                                                                                                                                                                                                                                                                                                                                                                                                                                                                                                                                                                                                                                                                                                                                                                                                                                                                                                                                                                                                                                                             |

SCHOLARONE™  
Manuscripts

1  
2  
3  
4 **Labour market attachment after mild traumatic brain injury:**  
5 **Nationwide cohort study with 5-year register follow-up**  
6  
7  
8

9 Heidi Jeannet Graff, MSc in Public Health<sup>1,2</sup>

10 Volkert Siersma, Statistician<sup>3</sup>

11 Anne Møller, Ph.D., Assistant professor<sup>3,4</sup>

12 Jakob Kragstrup, Professor<sup>3</sup>

13 Lars Louis Andersen, Professor<sup>5,6</sup>

14 Ingrid Egerod, Professor<sup>7</sup>

15 Hana Malá, Associate Professor<sup>8,9</sup>

16  
17  
18  
19  
20  
21  
22  
23 **Affiliations:**

24  
25  
26 <sup>1</sup> Department of Anaesthesia, Centre of Head and Orthopaedics, University Hospital Rigshospitalet,  
27  
28 Copenhagen, Denmark

29  
30  
31 <sup>2</sup> Trauma Center and Acute Admission, Centre of Head and Orthopaedics, University Hospital  
32  
33 Rigshospitalet, Copenhagen, Denmark

34  
35  
36 <sup>3</sup> Department of Public Health, The Research Unit for General Practice and Section of General Practice,  
37  
38 University of Copenhagen, Denmark

39  
40  
41 <sup>4</sup> Department of Occupational Medicine, Copenhagen University Hospital Holbæk, Denmark

42  
43  
44 <sup>5</sup> National Research Centre for the Working Environment, Copenhagen, Denmark

45  
46  
47 <sup>6</sup> Sport Sciences, Department of Health Science and Technology, Aalborg University, Aalborg, Denmark

48  
49  
50 <sup>7</sup> Intensive Care Unit, Rigshospitalet, University of Copenhagen, Denmark

51  
52  
53 <sup>8</sup> Department of Psychology, University of Copenhagen, Denmark

54  
55  
56 <sup>9</sup> Department of Neurology, University Hospital Bispebjerg-Frederiksberg, Copenhagen, Denmark

1  
2  
3  
4 **Corresponding author:**  
5

6 Heidi Jeannet Graff, University Hospital Rigshospitalet, Department of Anaesthesia, Blegdamsvej 9, 2100  
7  
8 Copenhagen, Denmark.  
9

10  
11 Phone: +45 40688504  
12

13 Email: heidi.jeannet.graff@regionh.dk  
14  
15

16 **Word count:** 3928  
17  
18  
19  
20  
21  
22  
23  
24  
25  
26  
27  
28  
29  
30  
31  
32  
33  
34  
35  
36  
37  
38  
39  
40  
41  
42  
43  
44  
45  
46  
47  
48  
49  
50  
51  
52  
53  
54  
55  
56  
57  
58  
59  
60

For peer review only

## ABSTRACT

**Objectives:** Sickness absence after mild traumatic brain injury (mTBI) is frequent. Although most patients return to work the first couple of months post-injury, for some patients sickness absence becomes prolonged due to post-concussive symptoms. Our objective was to examine labour market attachment following mTBI up to 5 years post-injury.

**Design and setting:** Nationwide cohort study with register follow-up.

**Participants:** Patients between 18-60 years with mTBI (ICD-10 diagnosis S06.0) were extracted from the Danish National Patient Register (n=19 732). Controls were matched on sex, age and municipality (n=18 640). Exclusion criteria were: major neurological injuries at the index date and 5 years before trauma, moving address outside Denmark, unknown residence, residence in Greenland, and not being available for employment.

**Primary and secondary outcome measures:** Primary outcome was “not attending ordinary work”. Secondary outcomes were health-related benefits, limited attachment to the labour market, permanent lack of attachment to the labour market and death. Data were extracted from the DREAM register.

**Results:** 5 years after diagnosis, 43% of patients were not attending ordinary work. The odds increased from 6 months (OR 1.30, 95% CI 1.24-1.36) to 5 years (OR 1.54, 95% CI 1.45-1.63). The odds of health-related benefits were 32% (OR 1.32, 95% CI 1.22-1.42) at 6 months and 22% (OR 1.22, 95% CI 1.12-1.33) at 5 years. Limited attachment to the labour market showed increased odds at 5 years (OR 1.38, 95% CI 1.27-1.51) and the odds of permanent lack of attachment to the labour market were higher for patients compared to controls, (OR 2.59, 95% CI 2.30-2.92). Death was more than two times higher at 5 years post-injury (OR 2.62, 95% CI 2.10-3.26).

1  
2  
3  
4 **Conclusions:**

5  
6 43% of patients with mTBI were not attending ordinary work 5 years post-trauma. Prevention and  
7  
8 treatment of persisting post-concussive symptoms should be considered.  
9

10  
11  
12  
13 ClinicalTrials.gov Identifier: NCT03214432  
14  
15

16  
17  
18  
19  
20  
21  
22  
23  
24  
25  
26  
27  
28  
29  
30  
31  
32  
33  
34  
35  
36  
37  
38  
39  
40  
41  
42  
43  
44  
45  
46  
47  
48  
49  
50  
51  
52  
53  
54  
55  
56  
57  
58  
59  
60

For peer review only

## ARTICLE SUMMARY

### Strengths and limitations of this study

- This was a nationwide cohort study with register-based follow-up including nearly 20 000 patients with mild traumatic brain injury (mTBI).
- The data were extracted from high-quality Danish national registers.
- This study estimated the prevalence and odds (OR) of not attending ordinary work, health-related benefits and death in patients with mTBI up to 5 years post-injury.
- This study had no access to patient records, with the inherent risk of misclassification.

## INTRODUCTION

Mild traumatic brain injury (mTBI), also known as “concussion”, is a common neurological disease defined as an acute brain injury resulting from mechanical energy to the head from external physical force, typically classified with a Glasgow Coma Scale score of 13-15 post-injury.<sup>1</sup>

Approximately 70-90% of all TBIs fall into the category of mTBI.<sup>2-4</sup> The incidence of hospital and emergency treated patients is 50-300 cases per 100 000 people in the US, Scandinavia and Australia<sup>4,5</sup> and more frequent among young people and men.<sup>4</sup> However, these numbers probably fall short as studies also show numbers more than 700 cases per 100 000 people per year.<sup>4</sup>

Numerous studies have examined post-concussive symptoms in adults showing symptoms like dizziness, fatigue, sensory and emotional disturbances, insomnia, posttraumatic headache, as well as memory and concentration difficulties<sup>6-8</sup> leading to long-term sickness and absence from work. Post-concussive symptoms result in an increased use of general practice services the first year post-injury, as reported by a Danish study.<sup>9</sup> In up to 15% of patients with mTBI, post-concussive symptoms are persistent (>12 months post-injury).<sup>10,11</sup> Additionally, several risk factors are associated with persisting symptomatology, such as female gender, premorbid physical or psychiatric comorbidities, injury-related conditions, such as duration of post traumatic amnesia, history of previous head injury, psychological distress, and drug and alcohol abuse.<sup>8,12,13</sup>

There is substantial evidence that most patients return to work within the first couple of months after mTBI, but a small proportion of patients is unable to return to work due to disability.<sup>14,15</sup> A systematic review by Cancelliere et al. found that most patients (>75%) had returned to work after six months and 5% were on social transfer payments two years post-injury.<sup>16</sup>

Return to work (RTW) has been conceptualized as being a dynamic process with different related outcomes of labour market attachment or time off work, but also outcomes related to the process of return to work such as psychological functioning, job satisfaction or work stress.<sup>17,18</sup>



1  
2  
3  
4 RTW after mTBI has been suggested to depend on multiple factors such as injury related factors,<sup>16</sup>  
5 premorbid demographics such as younger age,<sup>14</sup> work place related factors such as support,<sup>19</sup>  
6 influence on work planning<sup>20</sup> and patient characteristics such as psychosocial status.<sup>21</sup> The studies  
7  
8 on which these conclusions are based have methodological differences and limitations in study  
9  
10 design which complicate evaluation of evidence regarding the magnitude of the problem. They have  
11  
12 small sample sizes, are not representative,<sup>6</sup> are often based on self-reported data, have short follow-  
13  
14 up and considerable dropout which can lead to attrition bias.<sup>15</sup> The present analysis overcomes these  
15  
16 challenges by using Danish nationwide administrative data to examine a larger, representative  
17  
18 sample and to perform long-term follow up. This study is concerned with patients with mTBI who  
19  
20 are not able to return to work. We examined a comprehensive range of post-injury transitions in the  
21  
22 labour market aiming at analysing attachment to the labour market up to five years after mTBI  
23  
24 using a portfolio of outcomes, including a variation of social transfer payments and data on  
25  
26 permanent lack of attachment to the labour market and death.  
27  
28  
29  
30  
31

## 32 **METHODS**

33  
34 The data used in the present analyses is obtained by using the possibility to link several Danish  
35  
36 national administrative registers. These registers are available for research purposes, through the  
37  
38 unique personal identification number (CPR number) assigned to all Danish citizens at birth or  
39  
40 immigration, provided by the Danish Civil Registration System (CRS) operating the Population  
41  
42 register.<sup>22</sup>  
43  
44  
45  
46  
47

### 48 **Study population**

49  
50 The study was designed as a nationwide population-based cohort study of all mTBI cases in  
51  
52 Denmark in the five-year inclusion period 1<sup>st</sup> of January 2003 – 31<sup>st</sup> of December 2007. These cases  
53  
54 were identified in the Danish National Patient Register (DNPR) which contains the information on  
55  
56  
57  
58  
59  
60

1  
2  
3  
4 all in- and outpatient contacts in Danish secondary care.<sup>23</sup> Notably, it codes each contact with  
5  
6 International Classification of Diseases, version 10 (ICD-10) diagnosis codes. The mTBI patients  
7  
8 were included in the cohort on their index date, the date of their first entry in the DNPR in the  
9  
10 inclusion period with concussion (ICD-10 code S06.0) as primary diagnosis. The included patients  
11  
12 with mTBI had to be working-age adults between 18-60 years of age available for the labour market  
13  
14 on the index date; the upper limit was set because individuals in Denmark older than 60 years are  
15  
16 entitled to early retirement, if they have paid for such a scheme.<sup>24</sup> Availability for the labour market  
17  
18 was defined as gainful employment or receiving unemployment benefits, but actively job seeking  
19  
20 (see Figure 1). Furthermore, they were not hospital treated or diagnosed with other major  
21  
22 neurological injuries such as spinal cord and column injuries<sup>25</sup> and TBI (including concussion)<sup>5</sup> in  
23  
24 the five-year period 1<sup>st</sup> of January 1998 – 31<sup>st</sup> of December 2002 before the inclusion period<sup>5, 26</sup>  
25  
26 since previous brain injury and neurological problems are found to be associated with prolonged  
27  
28 symptoms.<sup>27</sup> Finally, patients were not included if they had lived outside of Denmark at any time  
29  
30 during the inclusion period and the five-year period before.  
31  
32  
33

34 For each mTBI case in the cohort, a control was randomly selected from the Population  
35  
36 register. The population of controls had similar inclusion criteria as the cases, but they had no  
37  
38 diagnosis of concussion during the inclusion period 1<sup>st</sup> of January 2003 – 31<sup>st</sup> of December 2007.  
39  
40 The control was matched to the case on sex, municipality, age (year of birth  $\pm$  0.5 years, expanded  
41  
42 to 1 and 2 years in case of no initial match) and available for the labour market on the  
43  
44 corresponding case's index date (see Figure 1).  
45  
46  
47  
48

49 Insert Figure 1  
50  
51

52 Availability for the labour market was assessed from the Danish Register for Evaluation of  
53  
54 Marginalization (DREAM), a national database containing weekly information on all individuals  
55  
56  
57  
58  
59  
60

1  
2  
3  
4 who have received any social public transfer payments.<sup>28</sup> Patients and their matching controls were  
5  
6 excluded from the cohort if there were any major neurological injuries<sup>5, 25</sup> as secondary diagnoses at  
7  
8 the index date, they were unavailable for the labour market, they had unknown residence or were  
9  
10 inhabitants of Greenland.

### 14 **Outcome measures**

15  
16 The outcomes of the present analyses were assessments of variations in attachment to the labour  
17  
18 market evaluated in the DREAM database the week before the case's index date, and at 6 months,  
19  
20 12 months, 2 years and 5 years after the case's index date (Figure 1).

#### 24 Not attending ordinary work

25  
26  
27 1. "Not attending ordinary work" was the primary outcome and was indicated by any entry in  
28  
29 DREAM, i.e. receiving any social transfer payment, such as unemployment benefits unrelated to the  
30  
31 subject's health condition, sickness absence benefits, social benefits granted, short and long-term  
32  
33 sickness or death. If there was no DREAM entry, it was assumed that the subject was gainfully  
34  
35 employed or self-supporting at that time (Figure 1).

36  
37  
38  
39  
40 The set of secondary outcomes are defined increasingly narrower than the primary outcome and  
41  
42 focus on attachment to the labour market due to health conditions. At the time of the current study,  
43  
44 employers in Denmark were obliged to finance sickness benefits for the first 30 days. Sickness  
45  
46 benefits lasting more than four consecutive weeks were to be compensated by the Danish  
47  
48 municipalities.<sup>29</sup> Sick-listed individuals could receive sickness benefits for a maximum of one year.  
49  
50 If individuals were not able to return to ordinary work due to long-term limited work capacity, a  
51  
52 partial return to work at lower capacity was possible with a "flex job". If the sick-listed individual  
53  
54  
55  
56  
57  
58  
59  
60

1  
2  
3  
4 was not able to return to work at all, the municipality could grant disability pension after an  
5 extensive assessment.<sup>30, 31</sup> The grading of the outcomes is illustrated in Figure 1.  
6  
7  
8  
9

#### 10 Health-related benefits

11  
12 2. Health-related benefits were indicated by DREAM entries given for short- or long-term  
13 restrictions in attachment to the labour market due to health conditions (excluding unemployment  
14 benefits unrelated to the subject's health condition). These were sickness absence benefits,  
15 vocational rehabilitation, flex job, unemployment benefits specifically granted citizens on flex job,  
16 social security benefits, light duties, disability pension and death.  
17  
18  
19  
20  
21  
22  
23  
24

#### 25 Limited attachment to the labour market

26  
27 3. Social transfer payments due to limited attachment to the labour market were indicated by  
28 DREAM entries given for reduced work capacity and thereby long-term restrictions in attachment  
29 to the labour market due to health conditions (excluding sickness absence benefits compared to  
30 secondary outcome 2). These were vocational rehabilitation, flex job, unemployment benefits  
31 specifically granted citizens on flex job, social security benefits, light duties, disability pension and  
32 death.  
33  
34  
35  
36  
37  
38  
39  
40  
41  
42

#### 43 Permanent lack of attachment to the labour market

44  
45 4. Permanent lack of attachment to the labour market was indicated by DREAM entries given for  
46 permanent withdrawal from the labour market due to health conditions. These were disability  
47 pension and death.  
48  
49  
50  
51  
52  
53  
54  
55  
56  
57  
58  
59  
60

## Death

5. Death was indicated by the DREAM entry for death.

## Potential confounders

Sex, age and municipality at the index date were obtained from the Population register linked to the DNPR. The municipality information was categorized into the five regions reflecting Denmark's reform of local government structure from 2007.<sup>32</sup> From the index date calendar year and season were derived. Calendar year was included in the model as a previous study found increasing odds of returning to work during the study period.<sup>33</sup> The reason could be a change in diagnostic practice and the Danish sickness benefit Act becoming more effective over the years. Seasonal variation was considered a confounder, as a previous study suggested that TBI is associated with season-specific activities and most pronounced during fall and winter.<sup>34</sup> Information on income was taken as personal gross income including revenue and social transfer income and was obtained from the Income Statistics Register.<sup>35</sup> Income was divided into four income groups: <100 000, 100 000-200 000, 200 000-300 000, >300 000 DKK roughly reflecting the quartiles in the present cohort. Information on the highest attained educational level was obtained from the Danish Education Register<sup>36</sup> and was categorized into three educational groups: low education (basic schooling), medium education (high school, trade and craft educations) and high education (short education, medium length education, bachelor's degree, university degrees and Ph.D.). Information on cohabitation status and ethnic origin was obtained from the Danish Family Relations Database<sup>22, 37</sup> and was categorized into married or cohabiting couple and single, and as Danish born and not Danish born respectively. Pre-injury illness burden was measured by Charlson comorbidity index (CCI), a weighted sum of 19 indicators for selected diagnoses.<sup>38, 39</sup> For the present CCI evaluation, a diagnosis was indicated for an individual when a corresponding ICD-10 code was encountered in

1  
2  
3  
4 the DNPR in the five-year period 1<sup>st</sup> of January 1998 – 31<sup>st</sup> of December 2002 before the inclusion  
5  
6 period. Psychiatric diagnoses are not incorporated in CCI but are possible confounders related to  
7  
8 both labour market attachment and an increased risk of TBI.<sup>40, 41</sup> Hence, information on psychiatric  
9  
10 diagnoses separately from CCI was obtained from the DNPR over the same five-year period.  
11  
12  
13

### 14 **Statistical analysis**

15  
16 The distribution of the baseline covariates at the index date, and the outcomes at the index date and  
17  
18 the follow-up time points were reported as numbers and percentages separately for mTBI patients  
19  
20 and their matched controls. Raw comparisons of the baseline covariates between the mTBI patients  
21  
22 and their controls are done by Chi-squared tests.  
23

24  
25 The difference in tendency of some degree of decreased attachment to the labour market, between  
26  
27 patients with mTBI and their controls, at each of the index date and the four follow-up time points,  
28  
29 was assessed by odds ratios (OR) and corresponding 95% confidence intervals (95%CI) from a  
30  
31 multivariable logistic regression model; an OR>1 implied higher odds for the mTBI group. The  
32  
33 model was parameterized so that the assessments at the four follow-up time points were adjusted for  
34  
35 differences already present at the index date, i.e. pre-injury differences. Hence, the assessment at  
36  
37 the index date can be viewed as an assessment of the employment aspect of a social gradient in  
38  
39 mTBI incidence; the assessments at the follow-up time points report on the short- and long-term  
40  
41 differences in attachment attributable to mTBI. Results are reported both unadjusted and adjusted  
42  
43 for the potential confounders: age, gender, municipality, seasonal variation, calendar year,  
44  
45 education, income, cohabitation status, ethnicity, pre-injury comorbidities and pre-injury psychiatric  
46  
47 diagnosis. Inference was done by generalized estimating equations to adjust for repeated  
48  
49 measurement and matching.  
50  
51  
52  
53  
54  
55  
56  
57  
58  
59  
60

1  
2  
3  
4 Subjects with missing values in one of the covariates were omitted from analyses where these  
5 covariates were included. P-values below 0.05 were considered statistically significant. SAS version  
6  
7  
8 9.4 was used for statistical analysis.  
9

### 12 **Patient and public involvement**

14 Patients and the public were not involved in the design and the conduct of the study  
15  
16

## 18 **RESULTS**

### 20 **Baseline characteristics of the population**

22 19 732 patients with mTBI were eligible for the cohort and 18 640 matching controls were included  
23  
24 in the study. In some cases, notably with patients from small municipalities, it was not possible to  
25  
26 find a matching control, see Figure 2. Furthermore, there was a weak tendency in patients with  
27  
28 mTBI to have lower socio-economic status (education, income) and higher prevalence of pre-injury  
29  
30 diseases (CCI, psychiatric diseases) compared to their matched controls (Table 1).  
31  
32  
33

34  
35 Insert Figure 2 (flow-chart)  
36  
37  
38  
39  
40  
41  
42  
43  
44  
45  
46  
47  
48  
49  
50  
51  
52  
53  
54  
55  
56  
57  
58  
59  
60

| <b>Table 1. Social and pre-injury health characteristics of patients with mTBI and controls</b> |                            |                        |                         |                |                            |
|-------------------------------------------------------------------------------------------------|----------------------------|------------------------|-------------------------|----------------|----------------------------|
|                                                                                                 | <b>Controls (n=18 640)</b> | <b>mTBI (n=19 732)</b> | <b>Total (n=38 372)</b> | <b>Missing</b> | <b>p-value<sup>1</sup></b> |
| <b>Age, n(%)</b>                                                                                |                            |                        |                         |                | 0.8461                     |
| 18-29 years                                                                                     | 8187 (43.92)               | 8734 (44.26)           | 16 921 (44.10)          | 0              |                            |
| 30-39 years                                                                                     | 4118 (22.09)               | 4290 (21.74)           | 8408 (21.91)            |                |                            |
| 40-49 years                                                                                     | 3458 (18.55)               | 3653 (18.51)           | 7111 (18.53)            |                |                            |
| 50-60 years                                                                                     | 2877 (15.43)               | 3055 (15.48)           | 5932 (15.46)            |                |                            |
| <b>Gender, n(%)</b>                                                                             |                            |                        |                         |                | 0.5839                     |
| Men                                                                                             | 11 266 (60.44)             | 11 872 (60.17)         | 23 138 (60.30)          | 0              |                            |
| Women                                                                                           | 7374 (39.56)               | 7860 (39.83)           | 15 234 (39.70)          |                |                            |
| <b>Education, n(%)</b>                                                                          |                            |                        |                         |                | <.0001                     |
| Low education                                                                                   | 6942 (37.73)               | 8951 (46.14)           | 15 893 (42.05)          | 574            |                            |
| Medium education                                                                                | 7992 (43.43)               | 7464 (38.48)           | 15 456 (40.89)          |                |                            |
| High education                                                                                  | 3466 (18.84)               | 2983 (15.38)           | 6449 (17.06)            |                |                            |
| <b>Income (Danish kroner, DKK<sup>2</sup>), n(%)</b>                                            |                            |                        |                         |                | <.0001                     |
| <100.000                                                                                        | 4144 (22.27)               | 4482 (22.72)           | 8626 (22.50)            | 40             |                            |
| 100.000-200.000                                                                                 | 4152 (22.31)               | 5697 (28.89)           | 9849 (25.69)            |                |                            |
| 200.000-300.000                                                                                 | 5325 (28.62)               | 5418 (27.47)           | 10 743 (28.03)          |                |                            |
| >300.000                                                                                        | 4988 (26.80)               | 4126 (20.92)           | 9114 (23.78)            |                |                            |
| <b>Cohabitation status, n(%)</b>                                                                |                            |                        |                         |                | <.0001                     |
| Married or cohabiting couple                                                                    | 5701 (30.68)               | 8051 (40.83)           | 13 752 (35.90)          | 70             |                            |
| Single                                                                                          | 12 884 (69.32)             | 11 666 (59.17)         | 24 550 (64.10)          |                |                            |
| <b>Ethnic origin, n(%)</b>                                                                      |                            |                        |                         |                | 0.5772                     |
| Danish born                                                                                     | 17 659 (95.02)             | 18 710 (94.89)         | 36 369 (94.95)          | 70             |                            |
| Born abroad                                                                                     | 926 (4.98)                 | 1007 (5.11)            | 1933 (5.05)             |                |                            |
| <b>CCI (categorical), n(%)</b>                                                                  |                            |                        |                         |                | <.0001                     |
| No comorbidities                                                                                | 17 863 (95.83)             | 18 580 (94.16)         | 36 443 (94.97)          | 0              |                            |
| 1 comorbidity                                                                                   | 577 (3.10)                 | 842 (4.27)             | 1419 (3.70)             | 0              |                            |
| 2 comorbidities                                                                                 | 154 (0.83)                 | 210 (1.06)             | 364 (0.95)              | 0              |                            |
| 3 comorbidities                                                                                 | 46 (0.25)                  | 100 (0.51)             | 146 (0.38)              | 0              |                            |
| <b>Psychiatric diagnosis, n(%)</b>                                                              |                            |                        |                         |                | <.0001                     |
| No diagnosis                                                                                    | 18 345 (98.42)             | 18 540 (93.96)         | 36 885 (96.12)          | 0              |                            |
| ≥1 diagnosis                                                                                    | 295 (1.58)                 | 1192 (6.04)            | 1487 (3.88)             |                |                            |

<sup>1</sup> P-value from a Pearson's chi-squared test  
<sup>2</sup> Currency exchange rate of May 2018: 1 EUR = 7.44834 DKK

### Analysis of attachment to labour market

Table 2 shows the prevalence for each outcome for patients and controls during 5 years of follow-up, reported at the index date, at 6 and 12 months and 2 and 5 years



**Table 2. Prevalence of labour market attachment and death in patients with mTBI and controls at 6 and 12 months and 2 and 5 years post-injury**

|                                                          | Controls (n=18 640) <sup>1</sup> | mTBI (n=19 732) <sup>1</sup> | Crude OR (95% CI)  | p-value | Adjusted OR (95% CI) <sup>2</sup> | p-value |
|----------------------------------------------------------|----------------------------------|------------------------------|--------------------|---------|-----------------------------------|---------|
| <b>Not attending ordinary work</b>                       |                                  |                              |                    |         |                                   |         |
| Index date, n(%)                                         | 5040 (27.04)                     | 6247 (31.66)                 | 1.25 (1.20-1.30)   | <.0001  | 1.01 (0.97-1.06)                  | 0.5406  |
| 6 months, n(%)                                           | 5107 (27.40)                     | 7289 (36.94)                 | 1.24 (1.20-1.29)   | <.0001  | 1.30 (1.25-1.36)                  | <.0001  |
| 12 months, n(%)                                          | 4898 (26.28)                     | 7149 (36.23)                 | 1.28 (1.22-1.33)   | <.0001  | 1.35 (1.28-1.42)                  | <.0001  |
| 2 years, n(%)                                            | 4793 (25.71)                     | 7297 (36.98)                 | 1.36 (1.29-1.42)   | <.0001  | 1.46 (1.38-1.54)                  | <.0001  |
| 5 years, n(%)                                            | 5520 (29.61)                     | 8420 (42.67)                 | 1.42 (1.35-1.49)   | <.0001  | 1.54 (1.45-1.64)                  | <.0001  |
| <b>Health-related benefits</b>                           |                                  |                              |                    |         |                                   |         |
| Index date, n(%)                                         | 795 (4.27)                       | 2230 (11.30)                 | 2.85 (2.62-3.10)   | <.0001  | 2.07 (1.90-2.25)                  | <.0001  |
| 6 months, n(%)                                           | 1120 (6.01)                      | 3600 (18.24)                 | 1.21 (1.13-1.29)   | <.0001  | 1.32 (1.22-1.42)                  | <.0001  |
| 12 months, n(%)                                          | 1197 (6.42)                      | 3584 (18.16)                 | 1.12 (1.04-1.20)   | 0.0020  | 1.22 (1.13-1.32)                  | <.0001  |
| 2 years, n(%)                                            | 1336 (7.17)                      | 3790 (19.21)                 | 1.07 (0.99-1.15)   | 0.0968  | 1.17 (1.08-1.27)                  | 0.0002  |
| 5 years, n(%)                                            | 1676 (8.99)                      | 4649 (23.56)                 | 1.08 (1.00-1.17)   | 0.0528  | 1.22 (1.12-1.33)                  | <.0001  |
| <b>Limited attachment to the labour market</b>           |                                  |                              |                    |         |                                   |         |
| Index date, n(%)                                         | 795 (4.27)                       | 2230 (11.30)                 | 2.86 (2.64-3.11)   | <.0001  | 1.93 (1.76-2.10)                  | <.0001  |
| 6 months, n(%)                                           | 816 (4.38)                       | 2326 (11.79)                 | 1.01 (0.95-1.08)   | 0.8162  | 1.02 (0.96-1.09)                  | 0.5123  |
| 12 months, n(%)                                          | 846 (4.54)                       | 2388 (12.10)                 | 1.00 (0.94-1.07)   | 0.9858  | 1.03 (0.96-1.11)                  | 0.3815  |
| 2 years, n(%)                                            | 884 (4.74)                       | 2784 (14.11)                 | 1.14 (1.06-1.23)   | 0.0005  | 1.23 (1.13-1.33)                  | <.0001  |
| 5 years, n(%)                                            | 1192 (6.39)                      | 3787 (19.19)                 | 1.20 (1.11-1.30)   | <.0001  | 1.39 (1.27-1.51)                  | <.0001  |
| <b>Permanent lack of attachment to the labour market</b> |                                  |                              |                    |         |                                   |         |
| Index date, n(%)                                         | 0 (0)                            | 0 (0)                        | .                  | .       | .                                 | .       |
| 6 months, n(%)                                           | 33 (0.18)                        | 82 (0.42)                    | 3.40 (2.36-4.90)   | <.0001  | 1.90 (1.36-2.66)                  | 0.0002  |
| 12 months, n(%)                                          | 58 (0.31)                        | 173 (1.88)                   | 3.63 (2.77-4.75)   | <.0001  | 2.14 (1.66 -2.77)                 | <.0001  |
| 2 years, n(%)                                            | 117 (0.63)                       | 424 (2.15)                   | 4.20 (3.49-5.05)   | <.0001  | 2.61 (2.17-3.14)                  | <.0001  |
| 5 years, n(%)                                            | 299 (1.60)                       | 1068 (5.41)                  | 3.67 (3.28-4.11)   | <.0001  | 2.59 (2.30-2.92)                  | <.0001  |
| <b>Death</b>                                             |                                  |                              |                    |         |                                   |         |
| Index date, n(%)                                         | 0 (0)                            | 0 (0)                        | .                  | .       | .                                 | .       |
| 6 months, n(%)                                           | 5 (0.03)                         | 59 (0.30)                    | 11.46 (4.38-29.94) | <.0001  | 6.37 (2.71-14.96)                 | <.0001  |
| 12 months, n(%)                                          | 12 (0.06)                        | 100 (0.51)                   | 8.03 (4.29-15.05)  | <.0001  | 4.67 (2.59-8.40)                  | <.0001  |
| 2 years, n(%)                                            | 26 (0.14)                        | 207 (1.05)                   | 7.67 (5.01-11.75)  | <.0001  | 4.72 (3.12-7.13)                  | <.0001  |
| 5 years, n(%)                                            | 118 (0.63)                       | 477 (2.42)                   | 3.91 (3.17-4.82)   | <.0001  | 2.62 (2.11-3.26)                  | <.0001  |

<sup>1</sup>Prevalence expressed as the total number and percentage of patients and controls experiencing the outcome

<sup>2</sup>Generalized estimating equation model with odds ratio of the outcome event in patients compared to controls adjusted for age, gender, municipality, seasonal variation, calendar year, education, income, cohabitation status, ethnicity, comorbidities and pre-injury psychiatric diagnosis

## Primary outcome

### *Not attending ordinary work*

For the primary outcome, we found that patients compared to controls had an overall higher increase of not attending ordinary work from the index date (32%, 27%) to 5 years post-injury (43%, 30%) (Table 2). Compared to the secondary outcomes, the prevalence was higher for not attending ordinary work which included social transfer payments that were not health related. For the unadjusted model, there were 25% higher odds of not attending ordinary work (OR 1.25, 95% CI 1.19-1.30) for patients compared to controls at the index date. However, for the adjusted model, no differences were seen between groups at the index date. During the 5 year of follow-up, the odds of not attending ordinary work increased, and at 5 years the odds were 54% higher (OR 1.54, 95% CI 1.45-1.63) among patients with mTBI (Table 2) compared to controls.

## Secondary outcomes

### *Health-related benefits*

The overall prevalence of health-related benefits was significantly higher for patients (11%) compared to controls (4%) at the index date, and the difference between groups continued during follow-up. The odds of health-related benefits were more than two times higher (OR 2.07, 95% CI 1.90-2.25) at the index date even after adjustment for potential socio-economic confounders and the odds of health-related benefits continued to stay elevated during follow-up. Table 2.

### *Limited attachment to the labour market*

For social transfer payments related to limited attachment to the labour market, the prevalence was also higher for patients (11%) compared to controls (4%) at the index date and slightly increased during follow-up. The adjusted OR was almost two times higher at the index date for patients

1  
2  
3  
4 compared to controls (OR 1.92, 95% CI 1.76-2.10). However, the long-term effect of mTBI on  
5  
6 limited attachment to the labour market was most pronounced at 2 years and 5 years.  
7  
8

#### 9 10 *Permanent lack of attachment to the labour market*

11  
12 During follow-up, a higher prevalence of permanent lack of attachment to the labour market was  
13  
14 seen in patients compared to controls, which increased from 6 months to 5 years. At 6 months the  
15  
16 adjusted odds for permanent lack of attachment to the labour market was almost two times higher  
17  
18 for patients (OR 1.90, 95% CI 1.36-2.66) and the long-term perspective continued showing large  
19  
20 effect.  
21  
22

#### 23 24 25 *Death*

26  
27 The prevalence of death was higher among patients showing an increase from 0.30% at 6 months to  
28  
29 2.42% at 5 years. The adjusted odds for death for patients with mTBI was six-fold increased at 6  
30  
31 months follow-up (OR 6.37 95% CI 2.71-14.95) and the long-term effects continued to be large but  
32  
33 diminishing during follow-up.  
34  
35

## 36 37 **DISCUSSION**

38  
39 This nationwide register-based study examined the consequences of mTBI on short and long-term  
40  
41 labour market attachment in a large cohort of working-age patients with mTBI up to 5 years post-  
42  
43 injury compared to matched controls of the general population. The proportion of approximately 20  
44  
45 000 included patients in this study are difficult to compare to previous studies, since these mostly  
46  
47 report incidence rates.<sup>4</sup> However, a Danish study included 10 000 patients in 1994 and 2002<sup>5</sup>, and  
48  
49 another Danish register-based study included approximately 90 000 patients during a 13-year  
50  
51 follow-up period.<sup>9</sup>  
52  
53  
54  
55  
56  
57  
58  
59  
60

1  
2  
3  
4 We found that the attachment to the labour market varied between patients and controls at the  
5 date of injury. The odds of not attending ordinary work indicating any social transfer payment was  
6 increased by 25% and remained higher for patients during the 5 years of follow-up (of about 40%).  
7  
8 A social gradient in not attending ordinary work at the index date could be suspected, as patients  
9  
10 had a significantly lower educational level, income and more comorbidities compared to controls  
11  
12 (see Table 1). Our findings agree with a Danish register-based cohort study<sup>9</sup> demonstrating that  
13  
14 individuals with mTBI had a higher use of general practice even 5 years before mTBI. However,  
15  
16 when we controlled for socio-economic factors, comorbidities and psychiatric diagnoses, there was  
17  
18 no difference in the odds of not attending ordinary work between the two groups in our sample at  
19  
20 index date. Yet, the adjusted odds of not attending ordinary work remained increased by 30-50%  
21  
22 during the 5 years follow-up. This strongly supports that mTBI is the incident leading to not  
23  
24 returning to work.  
25  
26  
27  
28

29 For the secondary outcomes, we saw the prevalence of sick listed decreased during follow-up, while  
30  
31 the prevalence of limited and finally permanent lack of attachment to the labour market increased as  
32  
33 expected. The proportion of individuals receiving health-related benefits at the index date was also  
34  
35 higher for patients compared to controls, and the risk was more than two times higher for patients  
36  
37 even after controlling for possible confounders. This may indicate increased morbidity in patients  
38  
39 with mTBI prior to the trauma as seen in another Danish study<sup>9</sup>, and variations in health seeking  
40  
41 behavior which result in health-related social transfer payments. However, at 6 months the odds  
42  
43 diminished to 30% and were further decreased during the follow-up around 16-20%. Comparing our  
44  
45 results to other studies, Stulemeijer et al. found a 76% full RTW rate at 6 months,<sup>42</sup> De Koning et  
46  
47 al. found a complete RTW rate of 77% at 12 months<sup>43</sup> and Losoi et al. also found that 97% had fully  
48  
49 RTW by 12 months after mTBI.<sup>6</sup> These findings are slightly higher than those reported in this  
50  
51 study. However, previous investigations are not directly comparable because there is a lack of  
52  
53  
54  
55  
56  
57  
58  
59  
60

1  
2  
3  
4 consistency in definitions of labour market attachment and RTW measures. RTW is increasingly  
5  
6 regarded as an evolving process consisting of different phases such as off work, work reentry,  
7  
8 retention and advancement and measures in each phase.<sup>44</sup> Additionally, differences between  
9  
10 countries in registration of social transfer payments, political legislation and socioeconomic  
11  
12 differences can complicate comparison.<sup>16</sup>  
13

14  
15 Theadom et al. found in a cohort study with 4 years of follow-up that work productivity was  
16  
17 reduced by 15.5% among patients with mTBI, who had to make job changes in order to continue  
18  
19 working.<sup>45</sup> Our study found a long-term prevalence of 19% and increased odds of almost 40% of  
20  
21 limited attachment to the labour market indicating long-term employment restrictions due to health  
22  
23 conditions. These results indicate that most patients return to work after mTBI, but a small  
24  
25 proportion of patients suffer long-term consequences related to mTBI, preventing them from fully  
26  
27 re-integrating into the labour market. Since a previous study indicates an association between  
28  
29 increasing length of sickness absence and increasing risk of disability pension,<sup>46</sup> these patients are  
30  
31 in a particular risk of transitioning from temporary to permanent social benefits, meaning an exit  
32  
33 from the labour market. For permanent lack of attachment to the labour market, the prevalence in  
34  
35 our study was higher for patients even though there were significantly fewer events especially at 6  
36  
37 and 12 months and 2 years, indicating that it takes time to qualify for disability pension in  
38  
39 Denmark. The odds of permanent lack of attachment to the labour market were still more than twice  
40  
41 as high in the short as well as the long-term among patients with mTBI, even when controlled for  
42  
43 potential confounders.  
44  
45

46  
47 Finally, the prevalence of death was higher in patients compared to controls. The odds of death  
48  
49 were more than 6 times higher for patients and continued to stay significantly higher during follow-  
50  
51 up. This is a surprising result. However, Selassie et al. found an in-hospital all-cause mortality rate  
52  
53 after mTBI of 1.4%<sup>47</sup> and Pentland et al. found similar results at 0.45% in a cohort with 21 years of  
54  
55  
56  
57  
58  
59  
60

1  
2  
3  
4 follow up,<sup>48</sup> agreeing with the result found in the present study. Additionally, a Danish study found  
5 an increased risk of suicide among patients with mTBI<sup>49</sup>. Although not the aim of the present study,  
6  
7 future research may benefit from exploring the risk factors in excess mortality in patients with  
8  
9  
10 mTBI.  
11  
12  
13

### 14 **Strengths and limitations**

15  
16 This study applied a register-based design which prevented information bias in the collection of  
17 labour market data and confounding factors. The DREAM register enabled us to estimate point  
18 prevalence during 5 years of follow-up and to examine much more diverse labour market outcome  
19 measures which is infrequent in TBI research.<sup>16</sup> Furthermore, the sensitivity and specificity of the  
20 DREAM register is considered high.<sup>50</sup> Finally, the use of national register data has made it possible  
21 to include a large sample size and a matching control group which increased the statistical power.  
22  
23 We also adjusted for a wide range of pre-injury potential confounders. However, residual  
24 confounding cannot be ruled out. The patients in this study were extracted from the DNPR.  
25  
26 Consequently, we did not have access to patient records, which hindered us to apply the operational  
27 case definition for mTBI suggested by WHO.<sup>1</sup> Even though the DNPR is considered to be the most  
28 comprehensive register of its kind<sup>23</sup>, its validity and consistency with clinical diagnoses are widely  
29 discussed, especially regarding clinical diagnoses and inaccurate coding leading to  
30 misclassification. The ICD-9 code (850) for concussion has in several studies been reported as the  
31 most frequently used for classification of mTBI<sup>1,51</sup> but has also shown lack of sensitivity and  
32 specificity.<sup>1</sup> This could also be expected to be the case for ICD-10. Additionally, a large proportion  
33 of the mTBI patients are not treated at the hospital, some are treated in primary care settings, and  
34 some refrain from counselling a physician,<sup>52</sup> which can lead to low incidence rates and selection  
35 bias, limiting the generalizability of the results.<sup>53</sup>  
36  
37  
38  
39  
40  
41  
42  
43  
44  
45  
46  
47  
48  
49  
50  
51  
52  
53  
54  
55  
56  
57  
58  
59  
60

## Implications

According to previous studies, a small proportion of patients with mTBI may suffer from persistent post-concussive symptoms for months and years after injury, preventing them from returning to previous work.<sup>13, 41, 54</sup> This study showed that patients with mTBI have a higher prevalence of receiving social transfer benefits compared to the general population post-injury. This represents a substantial cost for the society as a whole. In Denmark there are no national guidelines for the treatment and rehabilitation of patients with mTBI. This is in contrast to the guidelines developed for patients suffering more severe forms of TBI. We assume that the treatment trajectory in mTBI patients is therefore lengthy and inefficient, as it is highly dependent on referrals from general practitioners, insurance companies and the municipalities. Moreover, the offered services are highly variable and poorly coordinated. Our data suggest that from a societal perspective, also the treatment of patients with mTBI needs a comprehensive and coordinated approach, including the identification of patients at risk of developing persistent post-concussive symptoms and initiation of a treatment plan in a timely fashion. Future research should therefore focus on examining the contributory causes as to why patients with mTBI do not return to work.

## CONCLUSIONS

Most patients returned to work after mTBI. However, a small proportion of patients with mTBI received social transfer payments related to health and work disability to a higher extend than the general population up to 5 years post-injury, even when controlling for possible socio-economic and health related confounders. Additionally, the prevalence of death was increased during follow-up. Initiatives that prevent the progression of persistent post-concussive symptoms should be considered to reduce lack of attachment to the labour market in this patient group in the future.

## **ETHICS APPROVAL**

The study was approved by the Danish Data Protection Agency (Datatilsynet) no. (05179- RH-2016-389). The study protocol was registered on [clinicaltrials.gov](http://clinicaltrials.gov) on July 5, 2017 (ClinicalTrials.gov Identifier: NCT03214432).

## **Acknowledgements**

### **Competing interest statement**

None declared

### **Patient consent**

Not required

### **Funding**

This work was supported by the Research Foundation, Rigshospitalet (E-22260-03) (E-23473-01), the Danish Health Foundation (Helsefonden) (16-B-0050) and the Aase and Ejnar Danielsen Foundation (20-000054).

### **Contributors**

All authors participated in the study design, interpretation of the data, revising it critically and the final approval of the manuscript to be published. HJG obtained the funding, drafted the protocol and manuscript and collaborated with VS on performing the statistical analyses. AM, LA, JK, IE and HMR participated in the study design and conceptualization.



1  
2  
3  
4  
5  
6  
7  
8  
9  
10  
11  
12  
13  
14  
15  
16  
17  
18  
19  
20  
21  
22  
23  
24  
25  
26  
27  
28  
29  
30  
31  
32  
33  
34  
35  
36  
37  
38  
39  
40  
41  
42  
43  
44  
45  
46  
47  
48  
49  
50  
51  
52  
53  
54  
55  
56  
57  
58  
59  
60

**Data sharing statement**

No additional data are available

For peer review only

**REFERENCES**

1. Carroll LJ, Cassidy JD, Holm L, et al. Methodological issues and research recommendations for mild traumatic brain injury: the WHO Collaborating Centre Task Force on Mild Traumatic Brain Injury. *J Rehabil Med* 2004;(43 Suppl):113-25.
2. Levin HS, Diaz-Arrastia RR. Diagnosis, prognosis, and clinical management of mild traumatic brain injury. *Lancet Neurol* 2015;14:506-17.
3. van der Naalt J, Timmerman ME, de Koning ME, et al. Early predictors of outcome after mild traumatic brain injury (UPFRONT): an observational cohort study. *Lancet Neurol* 2017;16:532-40.
4. Cassidy JD, Carroll LJ, Peloso PM, et al. Incidence, risk factors and prevention of mild traumatic brain injury: results of the WHO Collaborating Centre Task Force on Mild Traumatic Brain Injury. *J Rehabil Med* 2004;(43 Suppl):28-60.
5. Engberg AW, Teasdale TW. Epidemiology and treatment of head injuries in Denmark 1994-2002, illustrated with hospital statistics. *Ugeskr Laeger* 2007;169:199-203.
6. Losoi H, Silverberg ND, Waljas M, et al. Recovery from Mild Traumatic Brain Injury in Previously Healthy Adults. *J Neurotrauma* 2016;33:766-76.
7. Dumke HA. Posttraumatic Headache and Its Impact on Return to Work After Mild Traumatic Brain Injury. *J Head Trauma Rehabil* 2017;32:E55-E65.
8. Ponsford J, Willmott C, Rothwell A, et al. Factors influencing outcome following mild traumatic brain injury in adults. *J Int Neuropsychol Soc* 2000;6:568-79.
9. Galili SF, Bech BH, Vestergaard C, et al. Use of general practice before and after mild traumatic brain injury: a nationwide population-based cohort study in Denmark. *BMJ Open* 2017;7:e017735.

10. Rutherford WH, Merrett JD, McDonald JR. Symptoms at one year following concussion from minor head injuries. *Injury* 1979;10:225-30.
11. Rees PM. Contemporary issues in mild traumatic brain injury. *Arch Phys Med Rehabil* 2003;84:1885-94.
12. Edna TH, Cappelen J. Late post-concussional symptoms in traumatic head injury. An analysis of frequency and risk factors. *Acta Neurochir (Wien)* 1987;86:12-7.
13. Ponsford J, Cameron P, Fitzgerald M, et al. Predictors of postconcussive symptoms 3 months after mild traumatic brain injury. *Neuropsychology* 2012;26:304-13.
14. Vicki L, Kristman PC, Sheilah Hogg-Johnson, David Cassidy, et al. The Burden of Work Disability Associated with Mild Traumatic Brain Injury in Ontario Compensated Workers: A Prospective Cohort Study. *The Open Occupational Health & Safety Journal* 2010;2:1-8.
15. Waljas M, Iverson GL, Lange RT, et al. Return to work following mild traumatic brain injury. *J Head Trauma Rehabil* 2014;29:443-50.
16. Cancelliere C, Kristman VL, Cassidy JD, et al. Systematic review of return to work after mild traumatic brain injury: results of the International Collaboration on Mild Traumatic Brain Injury Prognosis. *Arch Phys Med Rehabil* 2014;95:S201-9.
17. Pransky G, Gatchel R, Linton SJ, et al. Improving return to work research. *J Occup Rehabil* 2005;15:453-7.
18. Young AE, Wasiak R, Roessler RT, et al. Return-to-work outcomes following work disability: stakeholder motivations, interests and concerns. *J Occup Rehabil* 2005;15:543-56.
19. Sveen U, Soberg HL, Ostensjo S. Biographical disruption, adjustment and reconstruction of everyday occupations and work participation after mild traumatic brain injury. A focus group study. *Disabil Rehabil* 2016;38:2296-304.

- 1  
2  
3  
4 20. Friedland JF, Dawson DR. Function after motor vehicle accidents: a prospective study of  
5 mild head injury and posttraumatic stress. *J Nerv Ment Dis* 2001;189:426-34.  
6  
7  
8 21. Mani K, Cater B, Hudlikar A. Cognition and return to work after mild/moderate traumatic  
9 brain injury: A systematic review. *Work* 2017;58:51-62.  
10  
11  
12 22. Pedersen CB. The Danish Civil Registration System. *Scand J Public Health* 2011;39:22-5.  
13  
14 23. Lyng E, Sandegaard JL, Rebolj M. The Danish National Patient Register. *Scand J Public*  
15 *Health* 2011;39:30-3.  
16  
17  
18 24. Beskæftigelsesministeriet. Bekendtgørelse om efterlønsbevis, udskydelsesreglen og skattefri  
19 præmie m.v. BEK nr 4 af 02/01/2017 Gældende.  
20  
21 <https://www.retsinformation.dk/forms/R0710.aspx?id=186130>. (accessed 8 aug 2018)  
22  
23 25. Noonan VK, Thorogood NP, Fingas M, et al. The validity of administrative data to classify  
24 patients with spinal column and cord injuries. *J Neurotrauma* 2013;30:173-80.  
25  
26  
27 26. National Center for Injury Prevention and Control. Report to Congress on Mild Traumatic  
28 Brain Injury in the United States: Steps to prevent a Serious Public Health Problem. 2003.  
29  
30 <https://www.cdc.gov/traumaticbraininjury/pdf/mtbireport-a.pdf>. (accessed 8 aug 2018)  
31  
32  
33 27. Cassidy JD, Cancelliere C, Carroll LJ, et al. Systematic review of self-reported prognosis in  
34 adults after mild traumatic brain injury: results of the International Collaboration on Mild  
35 Traumatic Brain Injury Prognosis. *Arch Phys Med Rehabil* 2014;95:S132-51.  
36  
37  
38 28. Arbejdsmarkedsstyrelsen. DREAM version 41. 2018. [https://www.dst.dk/-](https://www.dst.dk/-/media/Kontorer/13-Forskning-og-Metode/DREAM-koder-version-41.docx?la=da)  
39 [/media/Kontorer/13-Forskning-og-Metode/DREAM-koder-version-41.docx?la=da](https://www.dst.dk/-/media/Kontorer/13-Forskning-og-Metode/DREAM-koder-version-41.docx?la=da).  
40  
41 (accessed 8 aug 2018)  
42  
43 29. Beskæftigelsesministeriet. Bekendtgørelse af lov om sygedagpenge. LBK nr 871 af  
44 28/06/2013 (Historisk). <https://www.retsinformation.dk/forms/R0710.aspx?id=152326>  
45  
46  
47  
48  
49  
50  
51  
52  
53  
54  
55  
56  
57  
58  
59  
60

- 1  
2  
3  
4 30. Beskæftigelsesministeriet. Lov om ændring af lov om en aktiv beskæftigelsesindsats, lov om  
5 aktiv socialpolitik, lov om fleksydelse, lov om betaling for uddannelse i forbindelse med  
6 visse tilbud efter lov om en aktiv beskæftigelsesindsats m.m. og ligningsloven. LOV nr 565  
7 af 09/06/2006 Gældende. <https://www.retsinformation.dk/forms/r0710.aspx?id=30748>  
8  
9  
10  
11  
12 31. Beskæftigelsesministeriet DMOE. Bekendtgørelse af lov om højeste, mellemste, forhøjet  
13 almindelig og almindelig førtidspension m.v. LBK nr 1209 af 17/11/2017 Gældende.  
14 <https://www.retsinformation.dk/eli/lta/2017/1209>  
15  
16  
17  
18 32. Ministry for Economic Affairs and the Interior. Structural reform 2007.  
19 <http://english.oim.dk/responsibilities-of-the-ministry/economics-of-municipalities-and->  
20 [regions/structural-reform/](http://english.oim.dk/responsibilities-of-the-ministry/economics-of-municipalities-and-).  
21  
22  
23  
24  
25 33. Hannerz H, Mortensen OS, Poulsen OM, et al. Time trend analysis of return to work after  
26 stroke in Denmark 1996-2006. *Int J Occup Med Environ Health* 2012;25:200-4.  
27  
28  
29 34. Rao DP, McFaull S, Thompson W, et al. Trends in self-reported traumatic brain injury  
30 among Canadians, 2005-2014: a repeated cross-sectional analysis. *CMAJ Open*  
31 2017;5:E301-E07.  
32  
33  
34  
35 35. Baadsgaard M, Quitzau J. Danish registers on personal income and transfer payments.  
36 *Scand J Public Health* 2011;39:103-5.  
37  
38  
39  
40 36. Jensen VM, Rasmussen AW. Danish Education Registers. *Scand J Public Health*  
41 2011;39:91-4.  
42  
43  
44  
45 37. Statistics Denmark. Households, Families and Children. Secondary Households, Families  
46 and Children 2017.  
47 <http://www.dst.dk/en/Statistik/dokumentation/documentationofstatistics/households-->  
48 [families-and-children.](http://www.dst.dk/en/Statistik/dokumentation/documentationofstatistics/households--)  
49  
50  
51  
52  
53  
54  
55  
56  
57  
58  
59  
60

- 1  
2  
3  
4 38. Thygesen SK, Christiansen CF, Christensen S, et al. The predictive value of ICD-10  
5 diagnostic coding used to assess Charlson comorbidity index conditions in the population-  
6 based Danish National Registry of Patients. *BMC Med Res Methodol* 2011;11:83.  
7  
8  
9  
10 39. Charlson ME, Pompei P, Ales KL, et al. A new method of classifying prognostic  
11 comorbidity in longitudinal studies: development and validation. *J Chronic Dis*  
12 1987;40:373-83.  
13  
14  
15  
16 40. Pedersen P, Lund T, Lindholdt L, et al. Labour market trajectories following sickness  
17 absence due to self-reported all cause morbidity-a longitudinal study. *BMC Public Health*  
18 2016;16:337.  
19  
20  
21  
22  
23 41. Carroll LJ, Cassidy JD, Cancelliere C, et al. Systematic review of the prognosis after mild  
24 traumatic brain injury in adults: cognitive, psychiatric, and mortality outcomes: results of the  
25 International Collaboration on Mild Traumatic Brain Injury Prognosis. *Arch Phys Med*  
26 *Rehabil* 2014;95:S152-73.  
27  
28  
29  
30  
31  
32 42. Stulemeijer M, van der Werf S, Borm GF, et al. Early prediction of favourable recovery 6  
33 months after mild traumatic brain injury. *J Neurol Neurosurg Psychiatry* 2008;79:936-42.  
34  
35  
36 43. de Koning ME, Scheenen ME, van der Horn HJ, et al. Prediction of work resumption and  
37 sustainability up to 1 year after mild traumatic brain injury. *Neurology* 2017;89:1908-14.  
38  
39  
40  
41 44. Steenstra IA, Lee H, de Vroome EM, et al. Comparing current definitions of return to work:  
42 a measurement approach. *J Occup Rehabil* 2012;22:394-400.  
43  
44  
45 45. Theadom A, Barker-Collo S, Jones K, et al. Work Limitations 4 Years After Mild Traumatic  
46 Brain Injury: A Cohort Study. *Arch Phys Med Rehabil* 2017;98:1560-66.  
47  
48  
49 46. Lund T, Kivimaki M, Labriola M, et al. Using administrative sickness absence data as a  
50 marker of future disability pension: the prospective DREAM study of Danish private sector  
51 employees. *Occup Environ Med* 2008;65:28-31.  
52  
53  
54  
55  
56  
57  
58  
59  
60

- 1  
2  
3  
4 47. Selassie AW, Fakhry SM, Ford DW. Population-based study of the risk of in-hospital death  
5 after traumatic brain injury: the role of sepsis. *J Trauma* 2011;71:1226-34.  
6  
7  
8 48. Pentland B, Hutton LS, Jones PA. Late mortality after head injury. *J Neurol Neurosurg*  
9 *Psychiatry* 2005;76:395-400.  
10  
11  
12 49. Madsen T, Erlangsen A, Orlovskaya S, et al. Association Between Traumatic Brain Injury and  
13 Risk of Suicide. *JAMA*. 2018;320:580–588.  
14  
15  
16 50. Stapelfeldt CM, Jensen C, Andersen NT, et al. Validation of sick leave measures: self-  
17 reported sick leave and sickness benefit data from a Danish national register compared to  
18 multiple workplace-registered sick leave spells in a Danish municipality. *BMC Public*  
19 *Health* 2012;12:661.  
20  
21  
22  
23  
24  
25 51. Chen AY, Colantonio A. Defining neurotrauma in administrative data using the  
26 International Classification of Diseases Tenth Revision. *Emerg Themes Epidemiol* 2011;8:4.  
27  
28  
29 52. Mannix R, O'Brien MJ, Meehan WP, 3rd. The epidemiology of outpatient visits for minor  
30 head injury: 2005 to 2009. *Neurosurgery* 2013;73:129-34  
31  
32  
33  
34 53. Kristman VL, Borg J, Godbolt AK, et al. Methodological issues and research  
35 recommendations for prognosis after mild traumatic brain injury: results of the International  
36 Collaboration on Mild Traumatic Brain Injury Prognosis. *Arch Phys Med Rehabil*  
37 2014;95:S265-77.  
38  
39  
40  
41  
42 54. van der Naalt J, van Zomeren AH, Sluiter WJ, et al. One year outcome in mild to moderate  
43 head injury: the predictive value of acute injury characteristics related to complaints and  
44 return to work. *J Neurol Neurosurg Psychiatry* 1999;66:207-13.  
45  
46  
47  
48  
49  
50  
51  
52  
53  
54  
55  
56  
57  
58  
59  
60

1  
2  
3  
4 Figure 1. Description of unavailable for the labour market (an exclusion criterion) (EX), the primary  
5  
6 outcome (1) and the secondary outcomes (2-5) in terms of the social transfer payments and other  
7  
8 social conditions that are included in each.  
9

10  
11 Figure 2. Inclusion of the study population  
12  
13  
14  
15  
16  
17  
18  
19  
20  
21  
22  
23  
24  
25  
26  
27  
28  
29  
30  
31  
32  
33  
34  
35  
36  
37  
38  
39  
40  
41  
42  
43  
44  
45  
46  
47  
48  
49  
50  
51  
52  
53  
54  
55  
56  
57  
58  
59  
60



1  
2  
3  
4  
5  
6  
7  
8  
9  
10  
11  
12  
13  
14  
15  
16  
17  
18  
19  
20  
21  
22  
23  
24  
25  
26  
27  
28  
29  
30  
31  
32  
33  
34  
35  
36  
37  
38  
39  
40  
41  
42  
43  
44  
45  
46  
47  
48  
49  
50  
51  
52  
53  
54  
55  
56  
57  
58  
59  
60

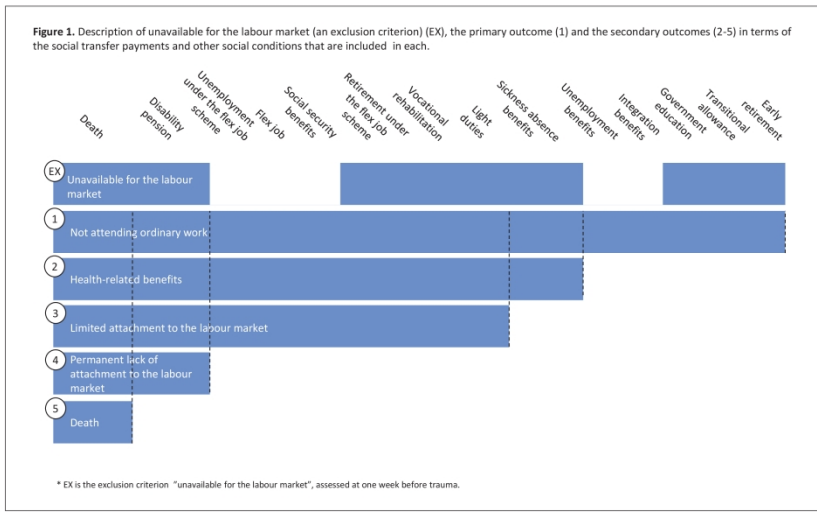

Figure 1. Description of unavailable for the labour market (an exclusion criterion) (EX), the primary outcome (1) and the secondary outcomes (2-5) in terms of the social transfer payments and other social conditions that are included in each.

297x209mm (300 x 300 DPI)

Figure 2. Inclusion of the study population

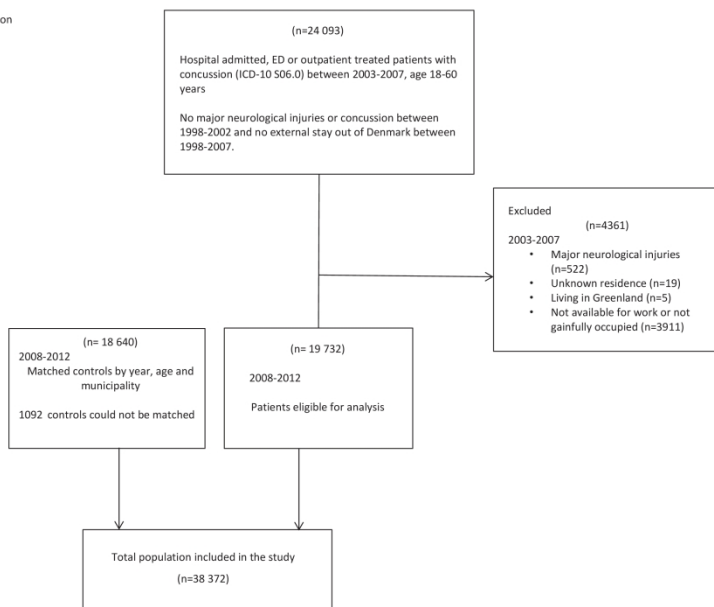

Figure 2. Inclusion of the study population

297x209mm (300 x 300 DPI)

STROBE Statement—Checklist of items that should be included in reports of *cohort studies*

|                              | Item No | Recommendation                                                                                                                                                                                                                                                                                                         | Page No     |
|------------------------------|---------|------------------------------------------------------------------------------------------------------------------------------------------------------------------------------------------------------------------------------------------------------------------------------------------------------------------------|-------------|
| <b>Title and abstract</b>    | 1       | (a) Indicate the study's design with a commonly used term in the title or the abstract<br>(b) Provide in the abstract an informative and balanced summary of what was done and what was found                                                                                                                          | 1, 3<br>3-4 |
| <b>Introduction</b>          |         |                                                                                                                                                                                                                                                                                                                        |             |
| Background/rationale         | 2       | Explain the scientific background and rationale for the investigation being reported                                                                                                                                                                                                                                   | 6-7         |
| Objectives                   | 3       | State specific objectives, including any prespecified hypotheses                                                                                                                                                                                                                                                       | 7           |
| <b>Methods</b>               |         |                                                                                                                                                                                                                                                                                                                        |             |
| Study design                 | 4       | Present key elements of study design early in the paper                                                                                                                                                                                                                                                                | 3, 7        |
| Setting                      | 5       | Describe the setting, locations, and relevant dates, including periods of recruitment, exposure, follow-up, and data collection                                                                                                                                                                                        | 7-8         |
| Participants                 | 6       | (a) Give the eligibility criteria, and the sources and methods of selection of participants. Describe methods of follow-up<br>(b) For matched studies, give matching criteria and number of exposed and unexposed                                                                                                      | 7-9         |
| Variables                    | 7       | Clearly define all outcomes, exposures, predictors, potential confounders, and effect modifiers. Give diagnostic criteria, if applicable                                                                                                                                                                               | 9-13        |
| Data sources/<br>measurement | 8*      | For each variable of interest, give sources of data and details of methods of assessment (measurement). Describe comparability of assessment methods if there is more than one group                                                                                                                                   | 8-11        |
| Bias                         | 9       | Describe any efforts to address potential sources of bias                                                                                                                                                                                                                                                              | 7, 20       |
| Study size                   | 10      | Explain how the study size was arrived at                                                                                                                                                                                                                                                                              | 7, 8,<br>13 |
| Quantitative variables       | 11      | Explain how quantitative variables were handled in the analyses. If applicable, describe which groupings were chosen and why                                                                                                                                                                                           | 11,<br>12   |
| Statistical methods          | 12      | (a) Describe all statistical methods, including those used to control for confounding<br>(b) Describe any methods used to examine subgroups and interactions<br>(c) Explain how missing data were addressed<br>(d) If applicable, explain how loss to follow-up was addressed<br>(e) Describe any sensitivity analyses | 12,<br>13   |
| <b>Results</b>               |         |                                                                                                                                                                                                                                                                                                                        |             |
| Participants                 | 13*     | (a) Report numbers of individuals at each stage of study—eg numbers potentially eligible, examined for eligibility, confirmed eligible, included in the study, completing follow-up, and analysed<br>(b) Give reasons for non-participation at each stage<br>(c) Consider use of a flow diagram                        | 13-<br>14   |
| Descriptive data             | 14*     | (a) Give characteristics of study participants (eg demographic, clinical, social) and information on exposures and potential confounders<br>(b) Indicate number of participants with missing data for each variable of interest<br>(c) Summarise follow-up time (eg, average and total amount)                         | 13-<br>15   |
| Outcome data                 | 15*     | Report numbers of outcome events or summary measures over time                                                                                                                                                                                                                                                         | 15-<br>17   |

|    |                          |    |                                                                                                                                                                                                              |       |
|----|--------------------------|----|--------------------------------------------------------------------------------------------------------------------------------------------------------------------------------------------------------------|-------|
| 1  | Main results             | 16 | (a) Give unadjusted estimates and, if applicable, confounder-adjusted estimates and their precision (eg, 95% confidence interval). Make clear which confounders were adjusted for and why they were included | 15-17 |
| 2  |                          |    | (b) Report category boundaries when continuous variables were categorized                                                                                                                                    |       |
| 3  |                          |    | (c) If relevant, consider translating estimates of relative risk into absolute risk for a meaningful time period                                                                                             |       |
| 4  |                          |    |                                                                                                                                                                                                              |       |
| 5  |                          |    |                                                                                                                                                                                                              |       |
| 6  |                          |    |                                                                                                                                                                                                              |       |
| 7  |                          |    |                                                                                                                                                                                                              |       |
| 8  | Other analyses           | 17 | Report other analyses done—eg analyses of subgroups and interactions, and sensitivity analyses                                                                                                               | -     |
| 9  |                          |    |                                                                                                                                                                                                              |       |
| 10 | <b>Discussion</b>        |    |                                                                                                                                                                                                              |       |
| 11 |                          |    |                                                                                                                                                                                                              |       |
| 12 | Key results              | 18 | Summarise key results with reference to study objectives                                                                                                                                                     | 17-20 |
| 13 |                          |    |                                                                                                                                                                                                              |       |
| 14 | Limitations              | 19 | Discuss limitations of the study, taking into account sources of potential bias or imprecision. Discuss both direction and magnitude of any potential bias                                                   | 20    |
| 15 |                          |    |                                                                                                                                                                                                              |       |
| 16 | Interpretation           | 20 | Give a cautious overall interpretation of results considering objectives, limitations, multiplicity of analyses, results from similar studies, and other relevant evidence                                   | 17-20 |
| 17 |                          |    |                                                                                                                                                                                                              |       |
| 18 | Generalisability         | 21 | Discuss the generalisability (external validity) of the study results                                                                                                                                        | 20    |
| 19 |                          |    |                                                                                                                                                                                                              |       |
| 20 | <b>Other information</b> |    |                                                                                                                                                                                                              |       |
| 21 | Funding                  | 22 | Give the source of funding and the role of the funders for the present study and, if applicable, for the original study on which the present article is based                                                | 22    |
| 22 |                          |    |                                                                                                                                                                                                              |       |
| 23 |                          |    |                                                                                                                                                                                                              |       |

\*Give information separately for exposed and unexposed groups.

**Note:** An Explanation and Elaboration article discusses each checklist item and gives methodological background and published examples of transparent reporting. The STROBE checklist is best used in conjunction with this article (freely available on the Web sites of PLoS Medicine at <http://www.plosmedicine.org/>, Annals of Internal Medicine at <http://www.annals.org/>, and Epidemiology at <http://www.epidem.com/>). Information on the STROBE Initiative is available at <http://www.strobe-statement.org>.

# BMJ Open

## Labour market attachment after mild traumatic brain injury: Nationwide cohort study with 5-year register follow-up in Denmark

|                                 |                                                                                                                                                                                                                                                                                                                                                                                                                                                                                                                                                                                                                                                                                                                                                                                                                                                                                                                                                                                                                                                                                                              |
|---------------------------------|--------------------------------------------------------------------------------------------------------------------------------------------------------------------------------------------------------------------------------------------------------------------------------------------------------------------------------------------------------------------------------------------------------------------------------------------------------------------------------------------------------------------------------------------------------------------------------------------------------------------------------------------------------------------------------------------------------------------------------------------------------------------------------------------------------------------------------------------------------------------------------------------------------------------------------------------------------------------------------------------------------------------------------------------------------------------------------------------------------------|
| Journal:                        | <i>BMJ Open</i>                                                                                                                                                                                                                                                                                                                                                                                                                                                                                                                                                                                                                                                                                                                                                                                                                                                                                                                                                                                                                                                                                              |
| Manuscript ID                   | bmjopen-2018-026104.R1                                                                                                                                                                                                                                                                                                                                                                                                                                                                                                                                                                                                                                                                                                                                                                                                                                                                                                                                                                                                                                                                                       |
| Article Type:                   | Research                                                                                                                                                                                                                                                                                                                                                                                                                                                                                                                                                                                                                                                                                                                                                                                                                                                                                                                                                                                                                                                                                                     |
| Date Submitted by the Author:   | 16-Jan-2019                                                                                                                                                                                                                                                                                                                                                                                                                                                                                                                                                                                                                                                                                                                                                                                                                                                                                                                                                                                                                                                                                                  |
| Complete List of Authors:       | Graff, Heidi; University Hospital Rigshospitalet, Department of Anaesthesia, 4231, Centre of Head and Orthopaedics<br>Siersma, Volkert; University of Copenhagen, Department of Public Health, The Research Unit for General Practice and Section of General Practice, University of Copenhagen, Denmark<br>Møller, Anne; Copenhagen University Hospital Holbæk, Department of Occupational Medicine; University of Copenhagen, Department of Public Health, The Research Unit for General Practice and Section of General Practice, University of Copenhagen, Denmark<br>Kragstrup, Jakob; University of Copenhagen, Department of Public Health, The Research Unit for General Practice and Section of General Practice<br>Andersen, Lars; National Research Centre for the Working Environment; Aalborg University, Sport Sciences, Department of Health Science and Technology<br>Egerod, Ingrid; University of Copenhagen, Intensive Care Unit, Rigshospitalet<br>Malá, Hana; University of Copenhagen, Department of Psychology; University Hospital Bispebjerg-Frederiksberg, Department of Neurology |
| <b>Primary Subject Heading</b>: | Neurology                                                                                                                                                                                                                                                                                                                                                                                                                                                                                                                                                                                                                                                                                                                                                                                                                                                                                                                                                                                                                                                                                                    |
| Secondary Subject Heading:      | Epidemiology, Neurology, Occupational and environmental medicine, Public health                                                                                                                                                                                                                                                                                                                                                                                                                                                                                                                                                                                                                                                                                                                                                                                                                                                                                                                                                                                                                              |
| Keywords:                       | Labour market attachment, Mild traumatic brain injury, Sickness absence, Post-concussive symptoms, Unemployment                                                                                                                                                                                                                                                                                                                                                                                                                                                                                                                                                                                                                                                                                                                                                                                                                                                                                                                                                                                              |
|                                 |                                                                                                                                                                                                                                                                                                                                                                                                                                                                                                                                                                                                                                                                                                                                                                                                                                                                                                                                                                                                                                                                                                              |

SCHOLARONE™  
Manuscripts

1  
2  
3  
4 **Labour market attachment after mild traumatic brain injury:**  
5  
6 **Nationwide cohort study with 5-year register follow-up in Denmark**  
7  
8  
9

10 Heidi Jeannet Graff, MSc in Public Health<sup>1,2</sup>

11 Volkert Siersma, Statistician<sup>3</sup>

12 Anne Møller, Assistant professor<sup>3,4</sup>

13 Jakob Kragstrup, Professor<sup>3</sup>

14 Lars Louis Andersen, Professor<sup>5,6</sup>

15 Ingrid Egerod, Professor<sup>7</sup>

16 Hana Malá Rytter, Associate Professor<sup>8,9</sup>

17  
18  
19  
20  
21  
22  
23  
24  
25  
26 **Affiliations:**  
27

28  
29 <sup>1</sup>Department of Anaesthesia, Centre of Head and Orthopaedics, Rigshospitalet, Copenhagen  
30 University Hospital, Denmark  
31

32  
33  
34 <sup>2</sup>Trauma Center and Acute Admission, Centre of Head and Orthopaedics, Rigshospitalet,  
35 Copenhagen University Hospital, Denmark  
36

37  
38  
39 <sup>3</sup>Department of Public Health, The Research Unit for General Practice and Section of General  
40 Practice, University of Copenhagen, Denmark  
41

42  
43  
44 <sup>4</sup>Department of Occupational Medicine, Copenhagen University Hospital Holbæk, Denmark  
45

46  
47  
48 <sup>5</sup>National Research Centre for the Working Environment, Copenhagen, Denmark  
49

50  
51  
52 <sup>6</sup>Sport Sciences, Department of Health Science and Technology, Aalborg University, Aalborg,  
53 Denmark  
54

55  
56  
57 <sup>7</sup>Intensive Care Unit, Rigshospitalet, Copenhagen University Hospital, Denmark  
58  
59  
60

1  
2  
3  
4<sup>8</sup>Department of Psychology, University of Copenhagen, Denmark  
5  
6

7<sup>9</sup>Department of Neurology, University Hospital Bispebjerg-Frederiksberg, Copenhagen, Denmark  
8  
9

10  
11 **Corresponding author:**  
12

13  
14 Heidi Jeannet Graff, University Hospital Rigshospitalet, Department of Anaesthesia, Blegdamsvej  
15  
16 9, 2100 Copenhagen, Denmark.  
17

18  
19 Phone: +45 40688504  
20

21 Email: heidi.jeannet.graff@regionh.dk  
22  
23

24  
25 **Word count: 3993**  
26  
27  
28  
29  
30  
31  
32  
33  
34  
35  
36  
37  
38  
39  
40  
41  
42  
43  
44  
45  
46  
47  
48  
49  
50  
51  
52  
53  
54  
55  
56  
57  
58  
59  
60

1  
2  
3  
4  
5  
6  
7  
8  
9  
10  
11  
12  
13  
14  
15  
16  
17  
18  
19  
20  
21  
22  
23  
24  
25  
26  
27  
28  
29  
30  
31  
32  
33  
34  
35  
36  
37  
38  
39  
40  
41  
42  
43  
44  
45  
46  
47  
48  
49  
50  
51  
52  
53  
54  
55  
56  
57  
58  
59  
60

## ABSTRACT

**Objectives:** Sickness absence after mild traumatic brain injury (mTBI) is frequent due to post-concussive symptoms. We examined labour market attachment following mTBI up to 5 years post-injury.

**Design and setting:** Nationwide cohort study with register follow-up.

**Participants:** Patients between 18-60 years with mTBI (ICD-10 diagnosis S06.0) were extracted from the Danish National Patient Register (n=19 732). Controls were matched on sex, age and municipality (n=18 640). Patients with spinal cord and column injuries, TBI and concussions five-years pre-injury or as secondary diagnosis to the concussion in the inclusion period were excluded.

**Primary and secondary outcome measures:** Data were extracted from the DREAM register. Primary outcome was “not attending ordinary work” defined as receiving any social transfer payment. Secondary outcomes were health-related benefits, limited attachment to the labour market, permanent lack of attachment to the labour market and death.

**Results:** 5 years after diagnosis, 43% of patients were not attending ordinary work. The odds increased from 6 months (OR 1.30, 95% CI 1.24-1.36) to 5 years (OR 1.54, 95% CI 1.45-1.63). The odds of health-related benefits were 32% (OR 1.32, 95% CI 1.22-1.42) at 6 months and 22% (OR 1.22, 95% CI 1.12-1.33) at 5 years. Limited attachment to the labour market showed increased odds at 5 years (OR 1.38, 95% CI 1.27-1.51) and the odds of permanent lack of attachment to the labour market were higher for patients compared to controls, (OR 2.59, 95% CI 2.30-2.92). Death was more than two times higher at 5 years post-injury (OR 2.62, 95% CI 2.10-3.26).



1  
2  
3  
4 **Conclusions:**  
5

6 43% of concussed patients were not attending ordinary work 5 years post-injury and received health  
7 and social transfer benefits. We conclude that mTBI has a long-term impact on labour market  
8 attachment. Prevention and treatment of persisting post-concussive symptoms should be considered.  
9  
10  
11  
12  
13  
14  
15

16 ClinicalTrials.gov Identifier: NCT03214432  
17  
18  
19  
20  
21  
22  
23  
24  
25  
26  
27  
28  
29  
30  
31  
32  
33  
34  
35  
36  
37  
38  
39  
40  
41  
42  
43  
44  
45  
46  
47  
48  
49  
50  
51  
52  
53  
54  
55  
56  
57  
58  
59  
60

## ARTICLE SUMMARY

### Strengths and limitations of this study

- This was a nationwide cohort study with register-based follow-up including nearly 20 000 patients with mild traumatic brain injury (mTBI).
- The data were extracted from high-quality Danish national registers.
- This study estimated the prevalence and odds (OR) of not attending ordinary work, health-related benefits and death in patients with mTBI up to 5 years post-injury.
- This study had no access to patient records, with the inherent risk of misclassification.

## INTRODUCTION

Mild traumatic brain injury (mTBI) is a common neurological disease defined as an acute brain injury resulting from mechanical energy to the head from external physical force, typically classified with a Glasgow Coma Scale score of 13-15 post-injury.<sup>1</sup> Concussion (commotio cerebri) represents an entity, that is grouped under mTBI, although the pathophysiology behind may be dissimilar and heterogeneous. The differentiation remains elusive due to the usual absence of objective findings on conventional imaging. The clinical diagnosis of concussion is based on short-lasting alteration of consciousness and presence of posttraumatic amnesia and confusion.<sup>2,3</sup> Despite recent efforts to improve the clinical diagnostic process,<sup>4,5</sup> accurate diagnosis of mTBI is still a challenge due to frequent confounding factors.

Approximately 70-90% of all TBIs fall into the category of mTBI.<sup>6-8</sup> The incidence of hospital and emergency treated patients is 50-300 cases per 100 000 people in the US, Scandinavia and Australia<sup>8,9</sup> and more frequent among young people and men.<sup>8</sup> However, these numbers probably fall short as studies also show numbers more than 700 cases per 100 000 people per year.<sup>8</sup>

Numerous studies have examined post-concussive symptoms in adults showing symptoms like dizziness, fatigue, insomnia, posttraumatic headache and memory and concentration difficulties<sup>10-12</sup> leading to long-term sickness and absence from work. Post-concussive symptoms result in an increased use of general practice services the first year post-injury, as reported by a Danish study.<sup>13</sup> In 15% of patients with mTBI, post-concussive symptoms are persistent (>12 months post-injury).<sup>14,15</sup> Additionally, several risk factors are associated with persisting symptomatology, such as female gender, premorbid physical or psychiatric comorbidities, injury-related conditions, previous head injury, psychological distress, and drug and alcohol abuse.<sup>12,16,17</sup>

Most patients return to work within the first couple of months after mTBI, but a small proportion of patients is unable to return to work due to disability.<sup>18,19</sup> Cancelliere et al. found that

1  
2  
3  
4 most patients (>75%) had returned to work after six months and 5% were on social transfer  
5  
6 payments two years post-injury.<sup>20</sup>  
7

8  
9 Return to work (RTW) has been conceptualized as being a dynamic process with different  
10 related outcomes of labour market attachment or time off work, but also outcomes related to the  
11 process of return to work such as psychological functioning and job satisfaction.<sup>21, 22</sup> RTW after  
12 mTBI has been suggested to depend on multiple factors such as injury related factors,<sup>20</sup> premorbid  
13 demographics such as younger age,<sup>18</sup> work place related factors such as support,<sup>23</sup> and influence on  
14 work planning<sup>24</sup> and patient characteristics such as psychosocial status.<sup>25</sup> These studies have  
15 methodological limitations in study design which complicate evaluation of evidence regarding the  
16 magnitude of the problem. They have small sample sizes, are not representative,<sup>10</sup> are based on self-  
17 reported data and have short follow-up and considerable dropout leading to attrition bias.<sup>19</sup> The  
18 present analysis overcomes these challenges by using Danish nationwide administrative data to  
19 examine a larger, representative sample and to perform long-term follow up. This study is  
20 concerned with labour market attachment in hospital treated patients receiving the diagnosis  
21 concussion (commotio cerebri) as the only brain injury diagnosis.  
22  
23  
24  
25  
26  
27  
28  
29  
30  
31  
32  
33  
34  
35  
36  
37

38  
39 We examined a comprehensive range of post-injury transitions in the labour market aiming at  
40 analysing attachment to the labour market up to five years after mTBI using a portfolio of  
41 outcomes, including a variation of social transfer payments and data on permanent lack of  
42 attachment to the labour market and death.  
43  
44  
45  
46  
47  
48  
49  
50  
51  
52  
53  
54  
55  
56  
57  
58  
59  
60

## METHODS

The data used in the present analyses is obtained by linking several Danish national registers through the unique personal identification number (CPR number) assigned to all Danish citizens at birth or immigration, provided by the Danish Civil Registration System (CRS).<sup>26</sup>

### Study population

The study was a nationwide population-based cohort study of all mTBI cases in Denmark in the five-year inclusion period 1<sup>st</sup> of January 2003 – 31<sup>st</sup> of December 2007. Cases were identified in the Danish National Patient Register (DNPR) which contains information on all in- and outpatient contacts in Danish secondary care.<sup>27</sup> Notably, it codes each contact with International Classification of Diseases, version 10 (ICD-10) diagnosis codes. Patients with mTBI were included in the cohort on their index date, the date of their first entry in the DNPR in the inclusion period with concussion (ICD-10 code S06.0) as primary diagnosis, excluding patients with diagnosis (primary or secondary) of cerebral oedema, diffuse and focal brain injury, subdural, epidural and subarachnoid haemorrhage, crushing injury and fracture of head, neck, skull, face and facial bones, and injuries of brain and cranial nerves in the inclusion period.<sup>9</sup> Included patients with mTBI were working-age adults between 18-60 years available for the labour market on the index date; the upper limit was set because individuals in Denmark older than 60 years are entitled to early retirement, if they have paid for such a scheme.<sup>28</sup> Availability for the labour market was defined as gainful employment or receiving unemployment benefits, but actively job seeking (see Figure 1). Furthermore, they were not hospital treated or diagnosed with other major neurological injuries such as spinal cord and column injuries<sup>29</sup> and traumatic brain injury (TBI) (including concussion)<sup>9</sup> in the five-year period 1<sup>st</sup> of January 1998 – 31<sup>st</sup> of December 2002 before the inclusion period<sup>9, 30</sup> since previous brain injury and neurological problems are found to be associated with prolonged symptoms.<sup>31</sup> Finally,

1  
2  
3  
4 patients were not included if they had lived outside of Denmark at any time during the inclusion  
5  
6 period and the five-year period before.  
7

8  
9 For each mTBI case in the cohort, a control was randomly selected from the Population  
10  
11 register. Controls had similar inclusion criteria as the cases, but they had no diagnosis of concussion  
12  
13 during the inclusion period 1<sup>st</sup> of January 2003 – 31<sup>st</sup> of December 2007.  
14

15  
16 The control was matched to the case on sex, municipality and age (year of birth  $\pm$  0.5 years,  
17  
18 expanded to 1 and 2 years in case of no initial match) (see Figure 1). The same exclusion criteria  
19  
20 were applied for the selection of controls.  
21  
22

23  
24  
25 Insert Figure 1  
26

27  
28 Availability for the labour market was assessed from the Danish Register for Evaluation of  
29  
30 Marginalization (DREAM), containing weekly information on all individuals receiving any social  
31  
32 public transfer payments.<sup>32</sup> Patients and their matching controls were excluded from the cohort if  
33  
34 there were any major neurological injuries<sup>9, 29</sup> as secondary diagnoses at the index date, they were  
35  
36 unavailable for the labour market, they had unknown residence or were inhabitants of Greenland.  
37  
38

## 39 40 41 **Outcome measures**

42  
43  
44 The outcomes of the present analyses were assessments of variations in attachment to the labour  
45  
46 market evaluated in the DREAM database (Figure 1) the week before the case's index date, and at 6  
47  
48 months, 12 months, 2 years and 5 years after the case's index date (Figure 1).  
49

### 50 51 **Not attending ordinary work**

52  
53 1. "Not attending ordinary work" was the primary outcome and was indicated by any entry in  
54  
55 DREAM, i.e. receiving any social transfer payment, such as unemployment benefits unrelated to the  
56  
57 subject's health condition, sickness absence benefits, social benefits granted, short and long-term  
58  
59  
60

1  
2  
3  
4 sickness or death. If there was no DREAM entry, it was assumed that the subject was gainfully  
5  
6 employed or self-supporting at that time (Figure 1).  
7  
8  
9

10  
11 The set of secondary outcomes are defined increasingly narrower than the primary outcome and  
12  
13 focus on attachment to the labour market due to health conditions. At the time of the current study,  
14  
15 employers in Denmark were obliged to finance sickness benefits for the first 30 days. Sickness  
16  
17 benefits lasting more than four consecutive weeks were to be compensated by the Danish  
18  
19 municipalities.<sup>33</sup> Sick-listed individuals could receive sickness benefits for a maximum of one  
20  
21 year<sup>34</sup>. If individuals were not able to return to ordinary work due to long-term limited work  
22  
23 capacity, a partial return to work at lower capacity was possible with a “flex job”. If the sick-listed  
24  
25 individual was not able to return to work at all, the municipality could grant disability pension.<sup>35, 36</sup>  
26  
27  
28  
29 The grading of the outcomes is illustrated in Figure 1.  
30  
31  
32  
33

#### 34 Health-related benefits

35  
36 2. Health-related benefits were indicated by DREAM entries given for short- or long-term  
37  
38 restrictions in attachment to the labour market due to health conditions (excluding unemployment  
39  
40 benefits unrelated to the subject’s health condition). These were sickness absence benefits,  
41  
42 vocational rehabilitation, flex job, unemployment benefits specifically granted to citizens on flex  
43  
44 job, social security benefits, light duties, disability pension and death.  
45  
46  
47  
48  
49

#### 50 Limited attachment to the labour market

51  
52 3. Social transfer payments due to limited attachment to the labour market were indicated by  
53  
54 DREAM entries given for reduced work capacity and thereby long-term restrictions in attachment  
55  
56 to the labour market due to health conditions (excluding sickness absence benefits compared to  
57  
58  
59  
60

1  
2  
3  
4 secondary outcome 2). These were vocational rehabilitation, flex job, unemployment benefits  
5  
6 specifically granted to citizens on flex job, social security benefits, light duties, disability pension  
7  
8 and death.  
9

10  
11  
12  
13 Permanent lack of attachment to the labour market

14  
15  
16 4. Permanent lack of attachment to the labour market was indicated by DREAM entries given for  
17  
18 permanent withdrawal from the labour market due to health conditions. These were disability  
19  
20 pension and death.  
21  
22

23  
24  
25 Death

26  
27 5. Death was indicated by the DREAM entry for death.  
28  
29  
30  
31

### 32 **Potential confounders**

33  
34 Sex, age and municipality at the index date were obtained from the Population register linked to the  
35  
36 DNPR. The municipality information was categorized into five regions reflecting Denmark's  
37  
38 reform of local government structure from 2007.<sup>37</sup> From the index date calendar year and season  
39  
40 were derived. Calendar year was included in the model as a previous study found increasing odds of  
41  
42 returning to work during the study period.<sup>38</sup> The reason could be a change in diagnostic practice and  
43  
44 the Danish sickness benefit Act becoming more effective over the years. Seasonal variation was  
45  
46 considered a confounder, as a previous study suggested that TBI is associated with season-specific  
47  
48 activities and most pronounced during fall and winter.<sup>39</sup> Pre-injury income was measured at the  
49  
50 index date and taken as personal gross income including revenue and social transfer income and  
51  
52 was obtained from the Income Statistics Register.<sup>40</sup> Income was divided into four income groups:  
53  
54 <100 000, 100 000-200 000, 200 000-300 000, >300 000 DKK roughly reflecting the quartiles in  
55  
56  
57  
58  
59  
60



1  
2  
3  
4 the present cohort. Information on the highest attained educational level was obtained from the  
5  
6 Danish Education Register<sup>41</sup> and was categorized into three educational groups: low education  
7  
8 (primary education), medium education (lower and upper secondary education, post-secondary–  
9  
10 non-tertiary education) and high education (short cycle tertiary education, bachelor, master, doctoral  
11  
12 or equivalent). Information on cohabitation status and ethnic origin was obtained from the Danish  
13  
14 Family Relations Database<sup>26, 42</sup> and was categorized into married or cohabiting couple and single,  
15  
16 and as Danish born and not Danish born respectively. Pre-injury illness burden was measured by  
17  
18 Charlson comorbidity index (CCI), a weighted sum of 19 indicators for selected diagnoses.<sup>43, 44</sup> For  
19  
20 the present CCI evaluation, a diagnosis was indicated for an individual when a corresponding ICD-  
21  
22 10 code was encountered in the DNPR in the five-year period 1<sup>st</sup> of January 1998 – 31<sup>st</sup> of  
23  
24 December 2002 before the inclusion period. Psychiatric diagnoses are not incorporated in CCI but  
25  
26 are possible confounders related to both labour market attachment and an increased risk of TBI.<sup>45, 46</sup>  
27  
28 Hence, information on psychiatric diagnoses separately from CCI was obtained from the DNPR  
29  
30 over the same five-year period.  
31  
32  
33  
34  
35  
36  
37

### 38 **Statistical analysis**

39  
40 Baseline covariates at the index date, and the outcomes at the index date and the follow-up time  
41  
42 points were reported as numbers and percentages separately for mTBI patients and their matched  
43  
44 controls. Raw comparisons of the baseline covariates between the mTBI patients and their controls  
45  
46 are done by Chi-squared tests.  
47  
48

49 The difference in tendency of some degree of decreased attachment to the labour market, between  
50  
51 patients with mTBI and their controls, at each of the index date and the four follow-up time points,  
52  
53 was assessed by odds ratios (OR) and corresponding 95% confidence intervals (95%CI) from a  
54  
55 multivariable logistic regression model; an OR>1 implied higher odds for the mTBI group. The  
56  
57 model was parameterized so that the assessments at the four follow-up time points were adjusted for  
58  
59  
60

1  
2  
3  
4 differences already present at the index date, i.e. pre-injury differences. Hence, the assessment at  
5  
6 the index date can be viewed as an assessment of the employment aspect of a social gradient in  
7  
8 mTBI incidence; the assessments at the follow-up time points report on the short- and long-term  
9  
10 differences in attachment attributable to mTBI. Results are reported both unadjusted and adjusted  
11  
12 for the potential confounders: age, gender, municipality, seasonal variation, calendar year,  
13  
14 education, income, cohabitation status, ethnicity, pre-injury comorbidities and pre-injury psychiatric  
15  
16 diagnosis. Inference was done by generalized estimating equations to adjust for repeated  
17  
18 measurement and matching.  
19  
20  
21  
22  
23 Subjects with missing values in one of the covariates were omitted from analyses where these  
24  
25 covariates were included. P-values below 0.05 were considered statistically significant. SAS version  
26  
27 9.4 was used for statistical analysis.  
28  
29  
30  
31

### 32 **Patient and public involvement**

33  
34 Patients and the public were not involved in the design and the conduct of the study.  
35  
36  
37

## 38 **RESULTS**

### 39 **Baseline characteristics of the population**

40  
41  
42 19 732 patients with mTBI were eligible for the cohort and 18 640 matching controls were included  
43  
44 in the study. In some cases, notably with patients from small municipalities, it was not possible to  
45  
46 find a matching control, see Figure 2. Overall, the cohort was characterized by a weak tendency in  
47  
48 patients with mTBI to have lower education, lower income, being married or cohabiting, and having  
49  
50 a higher prevalence of pre-injury diseases (both somatic diseases as captured by CCI and  
51  
52 psychiatric diseases) compared to their matched controls (Table 1).  
53  
54  
55  
56  
57

58 Insert Figure 2 (flow-chart)  
59  
60

1  
2  
3  
4  
5  
6  
7  
8  
9  
10  
11  
12  
13  
14  
15  
16  
17  
18  
19  
20  
21  
22  
23  
24  
25  
26  
27  
28  
29  
30  
31  
32  
33  
34  
35  
36  
37  
38  
39  
40  
41  
42  
43  
44  
45  
46  
47  
48  
49  
50  
51  
52  
53  
54  
55  
56  
57  
58  
59  
60

|                                                      | Controls (n=18 640) | mTBI (n=19 732) | Total (n=38 372) | Missing | p-value <sup>1</sup> |
|------------------------------------------------------|---------------------|-----------------|------------------|---------|----------------------|
| <b>Age, n(%)</b>                                     |                     |                 |                  |         | 0.8461               |
| 18-29 years                                          | 8187 (43.92)        | 8734 (44.26)    | 16 921 (44.10)   | 0       |                      |
| 30-39 years                                          | 4118 (22.09)        | 4290 (21.74)    | 8408 (21.91)     |         |                      |
| 40-49 years                                          | 3458 (18.55)        | 3653 (18.51)    | 7111 (18.53)     |         |                      |
| 50-60 years                                          | 2877 (15.43)        | 3055 (15.48)    | 5932 (15.46)     |         |                      |
| <b>Gender, n(%)</b>                                  |                     |                 |                  |         | 0.5839               |
| Men                                                  | 11 266 (60.44)      | 11 872 (60.17)  | 23 138 (60.30)   | 0       |                      |
| Women                                                | 7374 (39.56)        | 7860 (39.83)    | 15 234 (39.70)   |         |                      |
| <b>Education, n(%)</b>                               |                     |                 |                  |         | <.0001               |
| Low education                                        | 6942 (37.73)        | 8951 (46.14)    | 15 893 (42.05)   | 574     |                      |
| Medium education                                     | 7992 (43.43)        | 7464 (38.48)    | 15 456 (40.89)   |         |                      |
| High education                                       | 3466 (18.84)        | 2983 (15.38)    | 6449 (17.06)     |         |                      |
| <b>Income (Danish kroner, DKK<sup>2</sup>), n(%)</b> |                     |                 |                  |         | <.0001               |
| <100.000                                             | 4144 (22.27)        | 4482 (22.72)    | 8626 (22.50)     | 40      |                      |
| 100.000-200.000                                      | 4152 (22.31)        | 5697 (28.89)    | 9849 (25.69)     |         |                      |
| 200.000-300.000                                      | 5325 (28.62)        | 5418 (27.47)    | 10 743 (28.03)   |         |                      |
| >300.000                                             | 4988 (26.80)        | 4126 (20.92)    | 9114 (23.78)     |         |                      |
| <b>Cohabitation status, n(%)</b>                     |                     |                 |                  |         | <.0001               |
| Married or cohabiting couple                         | 5701 (30.68)        | 8051 (40.83)    | 13 752 (35.90)   | 70      |                      |
| Single                                               | 12 884 (69.32)      | 11 666 (59.17)  | 24 550 (64.10)   |         |                      |
| <b>Ethnic origin, n(%)</b>                           |                     |                 |                  |         | 0.5772               |
| Danish born                                          | 17 659 (95.02)      | 18 710 (94.89)  | 36 369 (94.95)   | 70      |                      |
| Born abroad                                          | 926 (4.98)          | 1007 (5.11)     | 1933 (5.05)      |         |                      |
| <b>CCI (categorical), n(%)</b>                       |                     |                 |                  |         | <.0001               |
| No comorbidities                                     | 17 863 (95.83)      | 18 580 (94.16)  | 36 443 (94.97)   | 0       |                      |
| 1 comorbidity                                        | 577 (3.10)          | 842 (4.27)      | 1419 (3.70)      | 0       |                      |
| 2 comorbidities                                      | 154 (0.83)          | 210 (1.06)      | 364 (0.95)       | 0       |                      |
| 3 comorbidities                                      | 46 (0.25)           | 100 (0.51)      | 146 (0.38)       | 0       |                      |
| <b>Psychiatric diagnosis, n(%)</b>                   |                     |                 |                  |         | <.0001               |
| No diagnosis                                         | 18 345 (98.42)      | 18 540 (93.96)  | 36 885 (96.12)   | 0       |                      |
| ≥1 diagnosis                                         | 295 (1.58)          | 1192 (6.04)     | 1487 (3.88)      |         |                      |

<sup>1</sup> P-value from a Pearson's chi-squared test

<sup>2</sup> Currency exchange rate of May 2018: 1 EUR = 7.44834 DKK

1  
2  
3  
4  
5  
6  
7  
8  
9  
10  
11  
12  
13  
14  
15  
16  
17  
18  
19  
20  
21  
22  
23  
24  
25  
26  
27  
28  
29  
30  
31  
32  
33  
34  
35  
36  
37  
38  
39  
40  
41  
42  
43  
44  
45  
46  
47  
48  
49  
50  
51  
52  
53  
54  
55  
56  
57  
58  
59  
60

**Analysis of attachment to labour market**

Table 2 shows the prevalence for each outcome for patients and controls during 5 years of follow-up.

For peer review only

**Table 2. Prevalence of labour market attachment and death in patients with mTBI and controls at 6 and 12 months and 2 and 5 years post-injury**

|                                                          | Controls (n=18 640) <sup>1</sup> | mTBI (n=19 732) <sup>1</sup> | Crude OR (95% CI)  | p-value | Adjusted OR (95% CI) <sup>2</sup> | p-value |
|----------------------------------------------------------|----------------------------------|------------------------------|--------------------|---------|-----------------------------------|---------|
| <b>Not attending ordinary work</b>                       |                                  |                              |                    |         |                                   |         |
| Index date, n(%)                                         | 5040 (27.04)                     | 6247 (31.66)                 | 1.25 (1.20-1.30)   | <.0001  | 1.01 (0.97-1.06)                  | 0.5406  |
| 6 months, n(%)                                           | 5107 (27.40)                     | 7289 (36.94)                 | 1.24 (1.20-1.29)   | <.0001  | 1.30 (1.25-1.36)                  | <.0001  |
| 12 months, n(%)                                          | 4898 (26.28)                     | 7149 (36.23)                 | 1.28 (1.22-1.33)   | <.0001  | 1.35 (1.28-1.42)                  | <.0001  |
| 2 years, n(%)                                            | 4793 (25.71)                     | 7297 (36.98)                 | 1.36 (1.29-1.42)   | <.0001  | 1.46 (1.38-1.54)                  | <.0001  |
| 5 years, n(%)                                            | 5520 (29.61)                     | 8420 (42.67)                 | 1.42 (1.35-1.49)   | <.0001  | 1.54 (1.45-1.64)                  | <.0001  |
| <b>Health-related benefits</b>                           |                                  |                              |                    |         |                                   |         |
| Index date, n(%)                                         | 795 (4.27)                       | 2230 (11.30)                 | 2.85 (2.62-3.10)   | <.0001  | 2.07 (1.90-2.25)                  | <.0001  |
| 6 months, n(%)                                           | 1120 (6.01)                      | 3600 (18.24)                 | 1.21 (1.13-1.29)   | <.0001  | 1.32 (1.22-1.42)                  | <.0001  |
| 12 months, n(%)                                          | 1197 (6.42)                      | 3584 (18.16)                 | 1.12 (1.04-1.20)   | 0.0020  | 1.22 (1.13-1.32)                  | <.0001  |
| 2 years, n(%)                                            | 1336 (7.17)                      | 3790 (19.21)                 | 1.07 (0.99-1.15)   | 0.0968  | 1.17 (1.08-1.27)                  | 0.0002  |
| 5 years, n(%)                                            | 1676 (8.99)                      | 4649 (23.56)                 | 1.08 (1.00-1.17)   | 0.0528  | 1.22 (1.12-1.33)                  | <.0001  |
| <b>Limited attachment to the labour market</b>           |                                  |                              |                    |         |                                   |         |
| Index date, n(%)                                         | 795 (4.27)                       | 2230 (11.30)                 | 2.86 (2.64-3.11)   | <.0001  | 1.93 (1.76-2.10)                  | <.0001  |
| 6 months, n(%)                                           | 816 (4.38)                       | 2326 (11.79)                 | 1.01 (0.95-1.08)   | 0.8162  | 1.02 (0.96-1.09)                  | 0.5123  |
| 12 months, n(%)                                          | 846 (4.54)                       | 2388 (12.10)                 | 1.00 (0.94-1.07)   | 0.9858  | 1.03 (0.96-1.11)                  | 0.3815  |
| 2 years, n(%)                                            | 884 (4.74)                       | 2784 (14.11)                 | 1.14 (1.06-1.23)   | 0.0005  | 1.23 (1.13-1.33)                  | <.0001  |
| 5 years, n(%)                                            | 1192 (6.39)                      | 3787 (19.19)                 | 1.20 (1.11-1.30)   | <.0001  | 1.39 (1.27-1.51)                  | <.0001  |
| <b>Permanent lack of attachment to the labour market</b> |                                  |                              |                    |         |                                   |         |
| Index date, n(%)                                         | 0 (0)                            | 0 (0)                        | .                  | .       | .                                 | .       |
| 6 months, n(%)                                           | 33 (0.18)                        | 82 (0.42)                    | 3.40 (2.36-4.90)   | <.0001  | 1.90 (1.36-2.66)                  | 0.0002  |
| 12 months, n(%)                                          | 58 (0.31)                        | 173 (1.88)                   | 3.63 (2.77-4.75)   | <.0001  | 2.14 (1.66-2.77)                  | <.0001  |
| 2 years, n(%)                                            | 117 (0.63)                       | 424 (2.15)                   | 4.20 (3.49-5.05)   | <.0001  | 2.61 (2.17-3.14)                  | <.0001  |
| 5 years, n(%)                                            | 299 (1.60)                       | 1068 (5.41)                  | 3.67 (3.28-4.11)   | <.0001  | 2.59 (2.30-2.92)                  | <.0001  |
| <b>Death</b>                                             |                                  |                              |                    |         |                                   |         |
| Index date, n(%)                                         | 0 (0)                            | 0 (0)                        | .                  | .       | .                                 | .       |
| 6 months, n(%)                                           | 5 (0.03)                         | 59 (0.30)                    | 11.46 (4.38-29.94) | <.0001  | 6.37 (2.71-14.96)                 | <.0001  |
| 12 months, n(%)                                          | 12 (0.06)                        | 100 (0.51)                   | 8.03 (4.29-15.05)  | <.0001  | 4.67 (2.59-8.40)                  | <.0001  |
| 2 years, n(%)                                            | 26 (0.14)                        | 207 (1.05)                   | 7.67 (5.01-11.75)  | <.0001  | 4.72 (3.12-7.13)                  | <.0001  |
| 5 years, n(%)                                            | 118 (0.63)                       | 477 (2.42)                   | 3.91 (3.17-4.82)   | <.0001  | 2.62 (2.11-3.26)                  | <.0001  |

<sup>1</sup>Prevalence expressed as the total number and percentage of patients and controls experiencing the outcome

<sup>2</sup>Generalized estimating equation model with odds ratio of the outcome event in patients compared to controls adjusted for age, gender, municipality, seasonal variation, calendar year, education, income, cohabitation status, ethnicity, comorbidities and pre-injury psychiatric diagnosis

## Primary outcome

### *Not attending ordinary work*

It can be seen from table 2 and figure 3 that patients compared to controls had an overall higher increase of not attending ordinary work from the index date (32%, 27%) to 5 years post-injury (43%, 30%) (Table 2) (Figure 3). Compared to the secondary outcomes, the prevalence was higher for not attending ordinary work which included social transfer payments that were not health related. For the unadjusted model, there were 25% higher odds of not attending ordinary work (OR 1.25, 95% CI 1.19-1.30) for patients compared to controls at the index date. However, for the adjusted model, no differences were seen between groups at the index date. During the 5 year of follow-up, the odds of not attending ordinary work increased, and at 5 years the odds were 54% higher (OR 1.54, 95% CI 1.45-1.63) among patients with mTBI (Table 2) (Figure 3) compared to controls.

Insert Figure 3

## Secondary outcomes

### *Health-related benefits*

The overall prevalence of health-related benefits was significantly higher for patients (11%) compared to controls (4%) at the index date, and the difference between groups continued during follow-up. The odds of health-related benefits were more than two times higher (OR 2.07, 95% CI 1.90-2.25) at the index date even after adjustment for potential socio-economic confounders and the odds of health-related benefits continued to stay elevated during follow-up. Table 2.

### *Limited attachment to the labour market*

For social transfer payments related to limited attachment to the labour market, the prevalence was also higher for patients (11%) compared to controls (4%) at the index date and slightly increased during follow-up. The adjusted OR was almost two times higher at the index date for patients compared to controls (OR 1.92, 95% CI 1.76-2.10). However, the long-term effect of mTBI on limited attachment to the labour market was most pronounced at 2 years and 5 years.

### *Permanent lack of attachment to the labour market*

During follow-up, a higher prevalence of permanent lack of attachment to the labour market was seen in patients compared to controls, which increased from 6 months to 5 years. At 6 months the adjusted odds for permanent lack of attachment to the labour market was almost two times higher for patients (OR 1.90, 95% CI 1.36-2.66) and the long-term perspective continued showing large effect.

### *Death*

The prevalence of death was higher among patients showing an increase from 0.30% at 6 months to 2.42% at 5 years. The adjusted odds for death for patients with mTBI was six-fold increased at 6 months follow-up (OR 6.37 95% CI 2.71-14.95) and the long-term effects continued to be large but diminishing during follow-up.

## **DISCUSSION**

We examined short and long-term labour market attachment in a large cohort of working-age patients with mTBI up to 5 years post-injury compared to the general population. The proportion of approximately 20 000 included patients in this study are difficult to compare to previous studies, since these mostly report incidence rates.<sup>8</sup> However, a Danish study included 10 000 patients in

1  
2  
3  
4 1994 and 2002,<sup>9</sup> and another Danish register-based study included approximately 90 000 patients  
5  
6 during a 13-year follow-up period.<sup>13</sup>  
7

8  
9 We found that attachment to the labour market varied between patients and controls at the  
10 date of injury. The odds of not attending ordinary work was increased by 25% and remained higher  
11 for patients during the 5 years of follow-up (of about 40%). A social gradient in not attending  
12 ordinary work at the index date could be suspected, as patients had a significantly lower educational  
13 level, income and more comorbidities compared to controls (see Table 1). Our findings agree with a  
14 Danish register-based cohort study<sup>13</sup> demonstrating that individuals with mTBI had a higher use of  
15 general practice even 5 years before mTBI. However, when we controlled for socio-economic  
16 factors, comorbidities and psychiatric diagnoses, there were no difference in the odds of not  
17 attending ordinary work between the two groups in our sample at index date. Yet, the adjusted odds  
18 of not attending ordinary work remained increased by 30-50% during the 5 years follow-up. This  
19 strongly supports that mTBI is the incident leading to not returning to work.  
20  
21  
22  
23  
24  
25  
26  
27  
28  
29  
30  
31  
32  
33

34 For the secondary outcomes, the prevalence of sick listed decreased during follow-up, while  
35 the prevalence of limited and permanent lack of attachment to the labour market increased as  
36 expected. The proportion of individuals receiving health-related benefits at the index date was also  
37 higher for patients compared to controls, and the risk was more than two times higher for patients  
38 even after controlling for possible confounders. This may indicate increased morbidity in patients  
39 with mTBI prior to the trauma as seen in another Danish study<sup>13</sup>, and variations in health seeking  
40 behavior which result in health-related social transfer payments. However, at 6 months the odds  
41 diminished to 30% and were further decreased during follow-up to 16-20%. Stulemeijer et al. found  
42 a 76% full RTW rate at 6 months,<sup>47</sup> De Koning et al. found a complete RTW rate of 77% at 12  
43 months<sup>48</sup> and Losoi et al. also found that 97% had fully RTW by 12 months after mTBI.<sup>10</sup> These  
44 findings are slightly higher than those reported in this study. However, previous investigations are  
45  
46  
47  
48  
49  
50  
51  
52  
53  
54  
55  
56  
57  
58  
59  
60



1  
2  
3  
4 not directly comparable because there is a lack of consistency in definitions of labour market  
5 attachment and RTW measures. RTW is increasingly regarded as an evolving process consisting of  
6 different phases such as off work, work reentry, retention and advancement.<sup>49</sup> Additionally,  
7 differences between countries in registration of social transfer payments, political legislation and  
8 socioeconomic differences can complicate comparison.<sup>20</sup>

9  
10  
11  
12  
13  
14  
15  
16 Theadom et al. found that work productivity was reduced by 15.5% among patients with  
17 mTBI, who had to make job changes to continue working.<sup>50</sup> Our study found a long-term  
18 prevalence of 19% and increased odds of almost 40% of limited attachment to the labour market  
19 indicating long-term employment restrictions due to health conditions. These results indicate that  
20 most patients return to work after mTBI, but a small proportion of patients suffer long-term  
21 consequences related to mTBI, preventing them from fully re-integrating into the labour market.  
22 Since a previous study indicates an association between increasing length of sickness absence and  
23 increasing risk of disability pension,<sup>51</sup> these patients are in risk of transitioning from temporary to  
24 permanent social benefits, meaning an exit from the labour market. For permanent lack of  
25 attachment to the labour market, the prevalence in our study was higher for patients even though  
26 there were significantly fewer events especially at 6 and 12 months and 2 years, indicating that it  
27 takes time to qualify for disability pension in Denmark. The odds of permanent lack of attachment  
28 to the labour market were still more than twice as high in the short as well as the long-term among  
29 patients with mTBI, even when controlled for potential confounders.

30  
31  
32  
33  
34  
35  
36  
37  
38  
39  
40  
41  
42  
43  
44  
45  
46  
47  
48 Finally, the prevalence of death was higher in patients compared to controls. The odds of death  
49 were more than 6 times higher for patients and subsequently declined during follow-up. This is a  
50 surprising result assumed to be predicted by a set of different factors (socio-economic indicators,  
51 comorbidities etc.) than those predicting labour market attachment. Selassie et al. found an in-  
52 hospital all-cause mortality rate after mTBI of 1.4%<sup>52</sup> and Pentland et al. found similar results at  
53  
54  
55  
56  
57  
58  
59  
60

1  
2  
3  
4 0.45% in a cohort with 21 years of follow up,<sup>53</sup> agreeing with the result found in the present study.

5  
6 Additionally, a Danish study found an increased risk of suicide among patients with mTBI<sup>54</sup>.

7  
8 Although not the aim of the present study, future research may benefit from exploring the risk  
9  
10 factors in excess mortality in patients with mTBI.  
11  
12  
13  
14

### 15 16 **Strengths and limitations**

17  
18 This study applied a register-based design preventing information bias in the collection of data. The  
19  
20 DREAM register enabled us to estimate point prevalence during 5 years of follow-up and to  
21  
22 examine much more diverse labour market outcomes which is infrequent in TBI research.<sup>20</sup>

23  
24 Furthermore, the sensitivity and specificity of the DREAM register is considered high.<sup>55</sup> Finally, the  
25  
26 use of national register data has made it possible to include a large sample size and a matching  
27  
28 control group which increased the statistical power. We also adjusted for a wide range of pre-injury  
29  
30 potential confounders. However, residual confounding such as injury mechanism and psychological  
31  
32 effects affecting outcome cannot be ruled out. Patients were extracted from the DNPR.  
33  
34

35  
36 Consequently, we did not have access to patient records, which hindered us to apply the operational  
37  
38 case definition for mTBI suggested by WHO.<sup>4</sup> Even though the DNPR is considered the most  
39  
40 comprehensive register of its kind,<sup>27</sup> its validity and consistency with clinical diagnoses are widely  
41  
42 discussed, especially regarding clinical diagnoses and inaccurate coding leading to  
43  
44 misclassification. The ICD-9 code (850) for concussion has in several studies been reported as  
45  
46 frequently used for the classification of mTBI<sup>4, 56</sup> but has also shown lack of sensitivity and  
47  
48 specificity.<sup>4</sup> This could also be expected to be the case for ICD-10. Additionally, a large proportion  
49  
50 of patients with mTBI are not treated at the hospital, some are treated in primary care settings, and  
51  
52 some refrain from counselling a physician,<sup>57</sup> which can lead to low incidence rates and selection  
53  
54 bias, limiting the generalizability of the results.<sup>58</sup>  
55  
56  
57  
58  
59  
60

## Implications

A small proportion of patients with mTBI may suffer from persistent post-concussive symptoms for months and years after injury, preventing returning to previous work.<sup>17, 46, 59</sup> This study showed that patients with mTBI have a higher prevalence of receiving social transfer payments compared to the general population post-injury. In Denmark there are no national guidelines for the treatment and rehabilitation of patients with mTBI. This is in contrast to the guidelines developed for patients suffering more severe forms of TBI. We therefore assume that the treatment trajectory in patients with mTBI is lengthy and inefficient, as it is highly dependent on referrals from general practitioners, insurance companies and the municipalities. Our data suggest that patients with mTBI needs a comprehensive and coordinated approach, including the identification of patients at risk of developing persistent post-concussive symptoms and initiation of a treatment plan in a timely fashion. Future research should focus on examining the contributory causes as to why patients with mTBI do not return to work.

## CONCLUSIONS

Most patients returned to work after mTBI. However, a small proportion of patients with mTBI received social transfer payments related to health and work disability to a higher extent than the general population at 5 years post-injury. Additionally, the prevalence of death was increased during follow-up. Initiatives that identify and prevent the progression of persistent post-concussive symptoms should be considered to reduce lack of attachment to the labour market in this patient group.

1  
2  
3  
4  
5  
6  
7  
8  
9  
10  
11  
12  
13  
14  
15  
16  
17  
18  
19  
20  
21  
22  
23  
24  
25  
26  
27  
28  
29  
30  
31  
32  
33  
34  
35  
36  
37  
38  
39  
40  
41  
42  
43  
44  
45  
46  
47  
48  
49  
50  
51  
52  
53  
54  
55  
56  
57  
58  
59  
60

## **ETHICS APPROVAL**

The study was approved by the Danish Data Protection Agency (Datatilsynet) no. (05179- RH-2016-389). The study protocol was registered on clinicaltrial.gov on July 5, 2017 (ClinicalTrials.gov Identifier: NCT03214432).

## **Acknowledgements**

### **Competing interest statement**

None declared

### **Patient consent**

Not required

### **Funding**

This work was supported by the Research Foundation, Rigshospitalet (E-22260-03) (E-23473-01), the Danish Health Foundation (Helsefonden) (16-B-0050) and the Aase and Ejnar Danielsen Foundation (20-000054).

### **Contributors**

All authors participated in the study design, interpretation of the data, revising it critically and the final approval of the manuscript to be published. HJG obtained the funding, drafted the protocol and manuscript and collaborated with VS on performing the statistical analyses. AM, LA, JK, IE and HMR participated in the study design and conceptualization.

1  
2  
3  
4 **Data sharing statement**  
5

6 No additional data are available  
7  
8  
9  
10  
11  
12  
13  
14  
15  
16  
17  
18  
19  
20  
21  
22  
23  
24  
25  
26  
27  
28  
29  
30  
31  
32  
33  
34  
35  
36  
37  
38  
39  
40  
41  
42  
43  
44  
45  
46  
47  
48  
49  
50  
51  
52  
53  
54  
55  
56  
57  
58  
59  
60

For peer review only

**REFERENCES**

1. Carroll LJ, Cassidy JD, Holm L, et al. Methodological issues and research recommendations for mild traumatic brain injury: the WHO Collaborating Centre Task Force on Mild Traumatic Brain Injury. *J Rehabil Med* 2004;(43 Suppl):113-25.
2. The American Congress of Rehabilitation Medicine (ACRM). Definition of mild traumatic brain injury. *J Head Trauma Rehabil* 1993;8:86-87.  
[https://acrm.org/wpcontent/uploads/pdf/TBIDef\\_English\\_10-10.pdf](https://acrm.org/wpcontent/uploads/pdf/TBIDef_English_10-10.pdf)  
(accessed 05 jan. 2019).
3. Katz DI, Cohen SI, Alexander MP, Handbook of Clinical Neurology, Vol. 127 (3rd series) Traumatic Brain Injury, Part I, J. Grafman and A.M. Salazar, Editors, 2015: 129-242.
4. McCrory P, et al. Consensus statement on concussion in sport: the 4th International Conference on Concussion in Sport held in Zurich, November 2012. *Br J Sports Med* 2013;47:250–258.
5. Uden L, Calcagnile O, Uden J, et al. Validation of the Scandinavian guidelines for initial management of minimal, mild and moderate traumatic brain injury in adults. *BMC Med* 2015;13:292.
6. Levin HS, Diaz-Arrastia RR. Diagnosis, prognosis, and clinical management of mild traumatic brain injury. *Lancet Neurol* 2015;14:506-17.
7. van der Naalt J, Timmerman ME, de Koning ME, et al. Early predictors of outcome after mild traumatic brain injury (UPFRONT): an observational cohort study. *Lancet Neurol* 2017;16:532-40.
8. Cassidy JD, Carroll LJ, Peloso PM, et al. Incidence, risk factors and prevention of mild traumatic brain injury: results of the WHO Collaborating Centre Task Force on Mild Traumatic Brain Injury. *J Rehabil Med* 2004;(43 Suppl):28-60.

- 1  
2  
3  
4 9. Engberg AW, Teasdale TW. Epidemiology and treatment of head injuries in Denmark 1994-  
5 2002, illustrated with hospital statistics. *Ugeskr Laeger* 2007;169:199-203.  
6  
7
- 8  
9 10. Losoi H, Silverberg ND, Waljas M, et al. Recovery from Mild Traumatic Brain Injury in  
10 Previously Healthy Adults. *J Neurotrauma* 2016;33:766-76.  
11  
12
- 13 11. Dumke HA. Posttraumatic Headache and Its Impact on Return to Work After Mild  
14 Traumatic Brain Injury. *J Head Trauma Rehabil* 2017;32:E55-E65.  
15  
16
- 17 12. Ponsford J, Willmott C, Rothwell A, et al. Factors influencing outcome following mild  
18 traumatic brain injury in adults. *J Int Neuropsychol Soc* 2000;6:568-79.  
19  
20
- 21 13. Galili SF, Bech BH, Vestergaard C, et al. Use of general practice before and after mild  
22 traumatic brain injury: a nationwide population-based cohort study in Denmark. *BMJ Open*  
23 2017;7:e017735.  
24  
25
- 26 14. Rutherford WH, Merrett JD, McDonald JR. Symptoms at one year following concussion  
27 from minor head injuries. *Injury* 1979;10:225-30.  
28  
29
- 30 15. Rees PM. Contemporary issues in mild traumatic brain injury. *Arch Phys Med Rehabil*  
31 2003;84:1885-94.  
32  
33
- 34 16. Edna TH, Cappelen J. Late post-concussional symptoms in traumatic head injury. An  
35 analysis of frequency and risk factors. *Acta Neurochir (Wien)* 1987;86:12-7.  
36  
37
- 38 17. Ponsford J, Cameron P, Fitzgerald M, et al. Predictors of postconcussive symptoms 3  
39 months after mild traumatic brain injury. *Neuropsychology* 2012;26:304-13.  
40  
41
- 42 18. Vicki L. Kristman PC, Sheilah Hogg-Johnson, David Cassidy, et al. The Burden of Work  
43 Disability Associated with Mild Traumatic Brain Injury in Ontario Compensated Workers:  
44 A Prospective Cohort Study. *The Open Occupational Health & Safety Journal* 2010;2:1-8.  
45  
46
- 47 19. Waljas M, Iverson GL, Lange RT, et al. Return to work following mild traumatic brain  
48 injury. *J Head Trauma Rehabil* 2014;29:443-50.  
49  
50  
51  
52  
53  
54  
55  
56  
57  
58  
59  
60

- 1
- 2
- 3
- 4 20. Cancelliere C, Kristman VL, Cassidy JD, et al. Systematic review of return to work after
- 5 mild traumatic brain injury: results of the International Collaboration on Mild Traumatic
- 6 Brain Injury Prognosis. *Arch Phys Med Rehabil* 2014;95:S201-9.
- 7
- 8
- 9
- 10
- 11 21. Pransky G, Gatchel R, Linton SJ, et al. Improving return to work research. *J Occup Rehabil*
- 12 2005;15:453-7.
- 13
- 14
- 15
- 16 22. Young AE, Wasiak R, Roessler RT, et al. Return-to-work outcomes following work
- 17 disability: stakeholder motivations, interests and concerns. *J Occup Rehabil* 2005;15:543-
- 18 56.
- 19
- 20
- 21
- 22
- 23 23. Sveen U, Soberg HL, Ostensjo S. Biographical disruption, adjustment and reconstruction of
- 24 everyday occupations and work participation after mild traumatic brain injury. A focus
- 25 group study. *Disabil Rehabil* 2016;38:2296-304.
- 26
- 27
- 28
- 29
- 30 24. Friedland JF, Dawson DR. Function after motor vehicle accidents: a prospective study of
- 31 mild head injury and posttraumatic stress. *J Nerv Ment Dis* 2001;189:426-34.
- 32
- 33
- 34 25. Mani K, Cater B, Hudlikar A. Cognition and return to work after mild/moderate traumatic
- 35 brain injury: A systematic review. *Work* 2017;58:51-62.
- 36
- 37
- 38
- 39 26. Pedersen CB. The Danish Civil Registration System. *Scand J Public Health* 2011;39:22-5.
- 40
- 41 27. Lyng E, Sandegaard JL, Rebolj M. The Danish National Patient Register. *Scand J Public*
- 42 *Health* 2011;39:30-3.
- 43
- 44
- 45 28. Beskæftigelsesministeriet [The Ministry of Employment]. Bekendtgørelse om
- 46 efterlønsbevis, udskydelsesreglen og skattefri præmie m.v. BEK nr 4 af 02/01/2017
- 47 Gældende. <https://www.retsinformation.dk/forms/R0710.aspx?id=186130>. (accessed 8 aug
- 48 2018)
- 49
- 50
- 51
- 52
- 53
- 54
- 55 29. Noonan VK, Thorogood NP, Fingas M, et al. The validity of administrative data to classify
- 56 patients with spinal column and cord injuries. *J Neurotrauma* 2013;30:173-80.
- 57
- 58
- 59
- 60



- 1  
2  
3  
4 30. National Center for Injury Prevention and Control. Report to Congress on Mild Traumatic  
5 Brain Injury in the United States: Steps to prevent a Serious Public Health Problem. 2003.  
6  
7 <https://www.cdc.gov/traumaticbraininjury/pdf/mtbireport-a.pdf>. (accessed 8 aug 2018)  
8  
9
- 10  
11 31. Cassidy JD, Cancelliere C, Carroll LJ, et al. Systematic review of self-reported prognosis in  
12 adults after mild traumatic brain injury: results of the International Collaboration on Mild  
13 Traumatic Brain Injury Prognosis. *Arch Phys Med Rehabil* 2014;95:S132-51.  
14  
15
- 16 32. Styrelsen for Arbejdsmarked og Rekruttering [Danish Agency for Labour Market and  
17 Recruitment] . DREAM version 41. 2018. [https://www.dst.dk/-/media/Kontorer/13-](https://www.dst.dk/-/media/Kontorer/13-Forskning-og-Metode/DREAM-koder-version-41.docx?la=da)  
18 [Forskning-og-Metode/DREAM-koder-version-41.docx?la=da](https://www.dst.dk/-/media/Kontorer/13-Forskning-og-Metode/DREAM-koder-version-41.docx?la=da). (accessed 8 aug 2018)  
19  
20  
21  
22  
23  
24
- 25 33. Beskæftigelsesministeriet [The Ministry of Employment]. Bekendtgørelse af lov om  
26 sygedagpenge. 2010/1 LSF 68. <http://www.retsinformation.dk/eli/ft/201012L00068>.  
27  
28 (accessed 03 jan. 2019).  
29  
30  
31
- 32 34. Beskæftigelsesministeriet [The Ministry of Employment]. Bekendtgørelse af lov om  
33 sygedagpenge. LBK nr 653 af 26/06/2012 Historisk.  
34  
35 <https://www.retsinformation.dk/Forms/R0710.aspx?id=142423#Afs6>. (accessed 03 jan.  
36  
37  
38  
39  
40  
41  
42  
43  
44  
45  
46  
47
- 48 35. Beskæftigelsesministeriet [The Ministry of Employment]. Bekendtgørelse af lov om en  
49 aktiv beskæftigelsesindsats. LBK nr 685 af 29/06/2005 Historisk.  
50  
51 <https://www.retsinformation.dk/Forms/R0710.aspx?id=30223>. (accessed 03 jan. 2019).  
52  
53  
54  
55  
56  
57  
58  
59  
60
36. Beskæftigelsesministeriet [The Ministry of Employment]. Bekendtgørelse af lov om social  
pension. LBK nr 783 af 09/07/2012.  
<https://www.retsinformation.dk/Forms/R0710.aspx?id=142132>. (accessed 03 jan. 2019).

1  
2  
3  
4  
5  
6  
7  
8  
9  
10  
11  
12  
13  
14  
15  
16  
17  
18  
19  
20  
21  
22  
23  
24  
25  
26  
27  
28  
29  
30  
31  
32  
33  
34  
35  
36  
37  
38  
39  
40  
41  
42  
43  
44  
45  
46  
47  
48  
49  
50  
51  
52  
53  
54  
55  
56  
57  
58  
59  
60

37. Ministry for Economic Affairs and the Interior. Structural reform 2007.  
<http://english.oim.dk/responsibilities-of-the-ministry/economics-of-municipalities-and-regions/structural-reform/>.
38. Hannerz H, Mortensen OS, Poulsen OM, et al. Time trend analysis of return to work after stroke in Denmark 1996-2006. *Int J Occup Med Environ Health* 2012;25:200-4.
39. Rao DP, McFaul S, Thompson W, et al. Trends in self-reported traumatic brain injury among Canadians, 2005-2014: a repeated cross-sectional analysis. *CMAJ Open* 2017;5:E301-E07.
40. Baadsgaard M, Quitzau J. Danish registers on personal income and transfer payments. *Scand J Public Health* 2011;39:103-5.
41. Jensen VM, Rasmussen AW. Danish Education Registers. *Scand J Public Health* 2011;39:91-4.
42. Statistics Denmark. Households, Families and Children. Secondary Households, Families and Children 2017.  
<http://www.dst.dk/en/Statistik/dokumentation/documentationofstatistics/households--families-and-children>.
43. Thygesen SK, Christiansen CF, Christensen S, et al. The predictive value of ICD-10 diagnostic coding used to assess Charlson comorbidity index conditions in the population-based Danish National Registry of Patients. *BMC Med Res Methodol* 2011;11:83.
44. Charlson ME, Pompei P, Ales KL, et al. A new method of classifying prognostic comorbidity in longitudinal studies: development and validation. *J Chronic Dis* 1987;40:373-83.

- 1  
2  
3  
4 45. Pedersen P, Lund T, Lindholdt L, et al. Labour market trajectories following sickness  
5 absence due to self-reported all cause morbidity-a longitudinal study. *BMC Public Health*  
6 2016;16:337.  
7  
8  
9  
10  
11 46. Carroll LJ, Cassidy JD, Cancelliere C, et al. Systematic review of the prognosis after mild  
12 traumatic brain injury in adults: cognitive, psychiatric, and mortality outcomes: results of the  
13 International Collaboration on Mild Traumatic Brain Injury Prognosis. *Arch Phys Med*  
14 *Rehabil* 2014;95:S152-73.  
15  
16  
17  
18  
19  
20 47. Stulemeijer M, van der Werf S, Borm GF, et al. Early prediction of favourable recovery 6  
21 months after mild traumatic brain injury. *J Neurol Neurosurg Psychiatry* 2008;79:936-42.  
22  
23  
24 48. de Koning ME, Scheenen ME, van der Horn HJ, et al. Prediction of work resumption and  
25 sustainability up to 1 year after mild traumatic brain injury. *Neurology* 2017;89:1908-14.  
26  
27  
28  
29 49. Steenstra IA, Lee H, de Vroome EM, et al. Comparing current definitions of return to work:  
30 a measurement approach. *J Occup Rehabil* 2012;22:394-400.  
31  
32  
33 50. Theadom A, Barker-Collo S, Jones K, et al. Work Limitations 4 Years After Mild Traumatic  
34 Brain Injury: A Cohort Study. *Arch Phys Med Rehabil* 2017;98:1560-66.  
35  
36  
37  
38 51. Lund T, Kivimaki M, Labriola M, et al. Using administrative sickness absence data as a  
39 marker of future disability pension: the prospective DREAM study of Danish private sector  
40 employees. *Occup Environ Med* 2008;65:28-31.  
41  
42  
43  
44 52. Selassie AW, Fakhry SM, Ford DW. Population-based study of the risk of in-hospital death  
45 after traumatic brain injury: the role of sepsis. *J Trauma* 2011;71:1226-34.  
46  
47  
48  
49 53. Pentland B, Hutton LS, Jones PA. Late mortality after head injury. *J Neurol Neurosurg*  
50 *Psychiatry* 2005;76:395-400.  
51  
52  
53  
54 54. Madsen T, Erlangsen A, Orlovska S, et al. Association Between Traumatic Brain Injury and  
55 Risk of Suicide. *JAMA*. 2018;320:580-588.  
56  
57  
58  
59  
60

1  
2  
3  
4  
5  
6  
7  
8  
9  
10  
11  
12  
13  
14  
15  
16  
17  
18  
19  
20  
21  
22  
23  
24  
25  
26  
27  
28  
29  
30  
31  
32  
33  
34  
35  
36  
37  
38  
39  
40  
41  
42  
43  
44  
45  
46  
47  
48  
49  
50  
51  
52  
53  
54  
55  
56  
57  
58  
59  
60

55. Stapelfeldt CM, Jensen C, Andersen NT, et al. Validation of sick leave measures: self-reported sick leave and sickness benefit data from a Danish national register compared to multiple workplace-registered sick leave spells in a Danish municipality. *BMC Public Health* 2012;12:661.
56. Chen AY, Colantonio A. Defining neurotrauma in administrative data using the International Classification of Diseases Tenth Revision. *Emerg Themes Epidemiol* 2011;8:4.
57. Mannix R, O'Brien MJ, Meehan WP, 3rd. The epidemiology of outpatient visits for minor head injury: 2005 to 2009. *Neurosurgery* 2013;73:129-34
58. Kristman VL, Borg J, Godbolt AK, et al. Methodological issues and research recommendations for prognosis after mild traumatic brain injury: results of the International Collaboration on Mild Traumatic Brain Injury Prognosis. *Arch Phys Med Rehabil* 2014;95:S265-77.
59. van der Naalt J, van Zomeren AH, Sluiter WJ, et al. One year outcome in mild to moderate head injury: the predictive value of acute injury characteristics related to complaints and return to work. *J Neurol Neurosurg Psychiatry* 1999;66:207-13.

1  
2  
3  
4 Figure 1. Description of social transfer payments as part of the Danish welfare system. Categories  
5 describe unavailable for the labour market (an exclusion criterion) (EX), the primary outcome (1)  
6  
7 and the secondary outcomes (2-5) in terms of the different social transfer payments and other social  
8  
9 conditions (first row) that are included in each.  
10  
11  
12

13  
14 Figure 2. Inclusion of the study population  
15  
16

17 Figure 3. Prevalence and adjusted odds of not attending ordinary work at the index date and up to 5  
18  
19 years after concussion  
20  
21  
22  
23  
24  
25  
26  
27  
28  
29  
30  
31  
32  
33  
34  
35  
36  
37  
38  
39  
40  
41  
42  
43  
44  
45  
46  
47  
48  
49  
50  
51  
52  
53  
54  
55  
56  
57  
58  
59  
60

1  
2  
3  
4  
5  
6  
7  
8  
9  
10  
11  
12  
13  
14  
15  
16  
17  
18  
19  
20  
21  
22  
23  
24  
25  
26  
27  
28  
29  
30  
31  
32  
33  
34  
35  
36  
37  
38  
39  
40  
41

**Figure 1.** Description of social transfer payments as part of the Danish welfare system. Categories describe unavailable for the labour market (an exclusion criterion) (EX), the primary outcome (1) and the secondary outcomes (2-5) in terms of the different social transfer payments and other social conditions (first row) that are included in each.

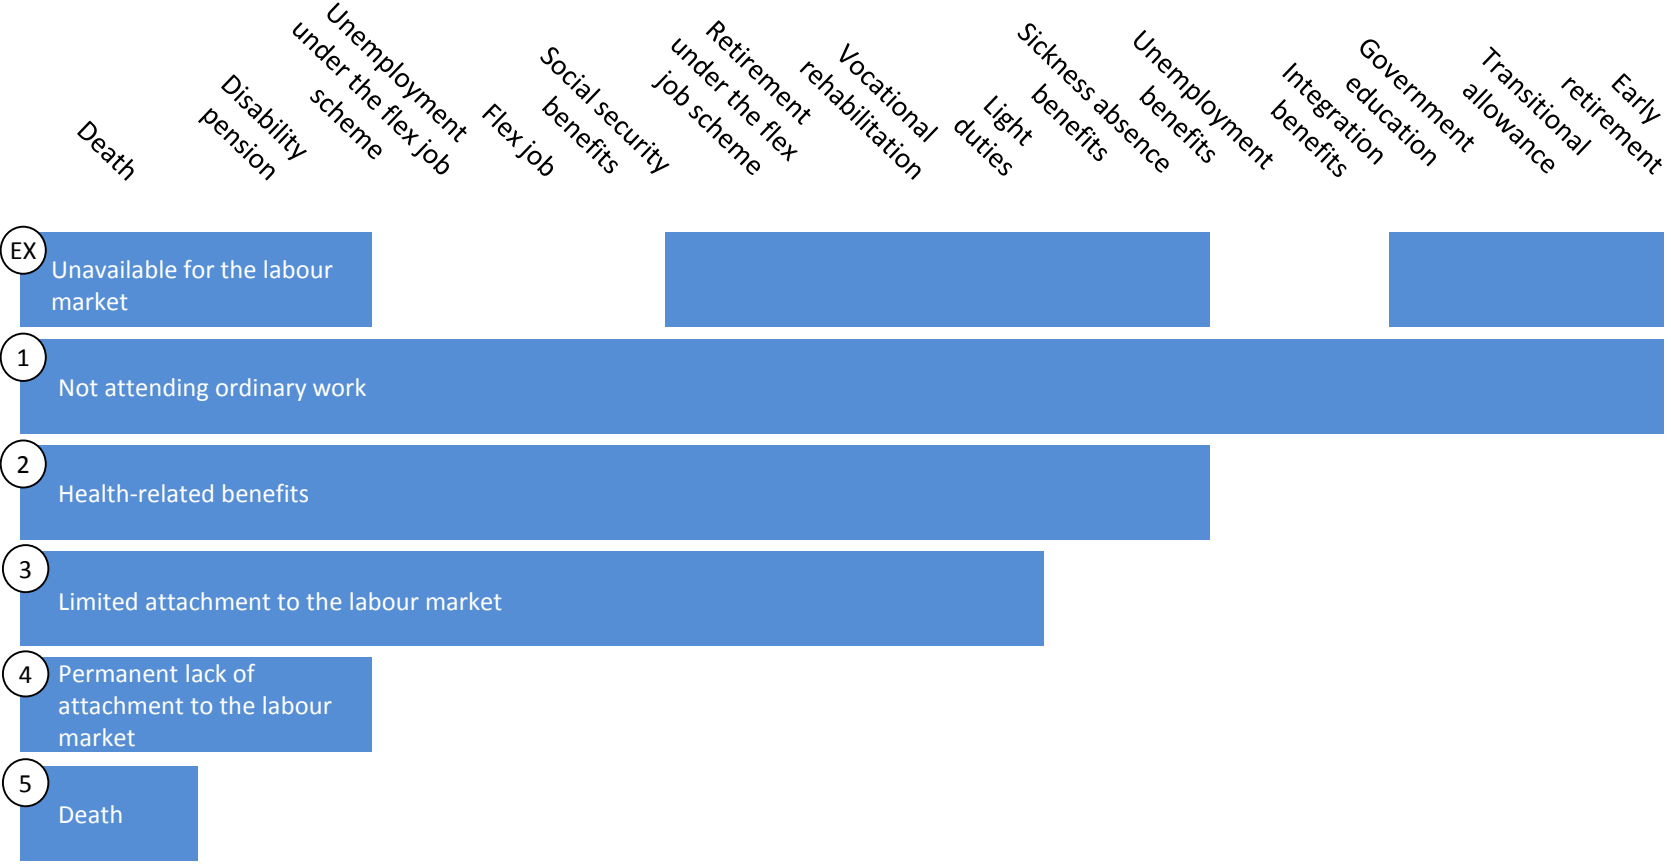

\* EX is the exclusion criterion "Unavailable for the labour market", assessed at one week before the trauma.

**Figure 2.** Inclusion of the study population

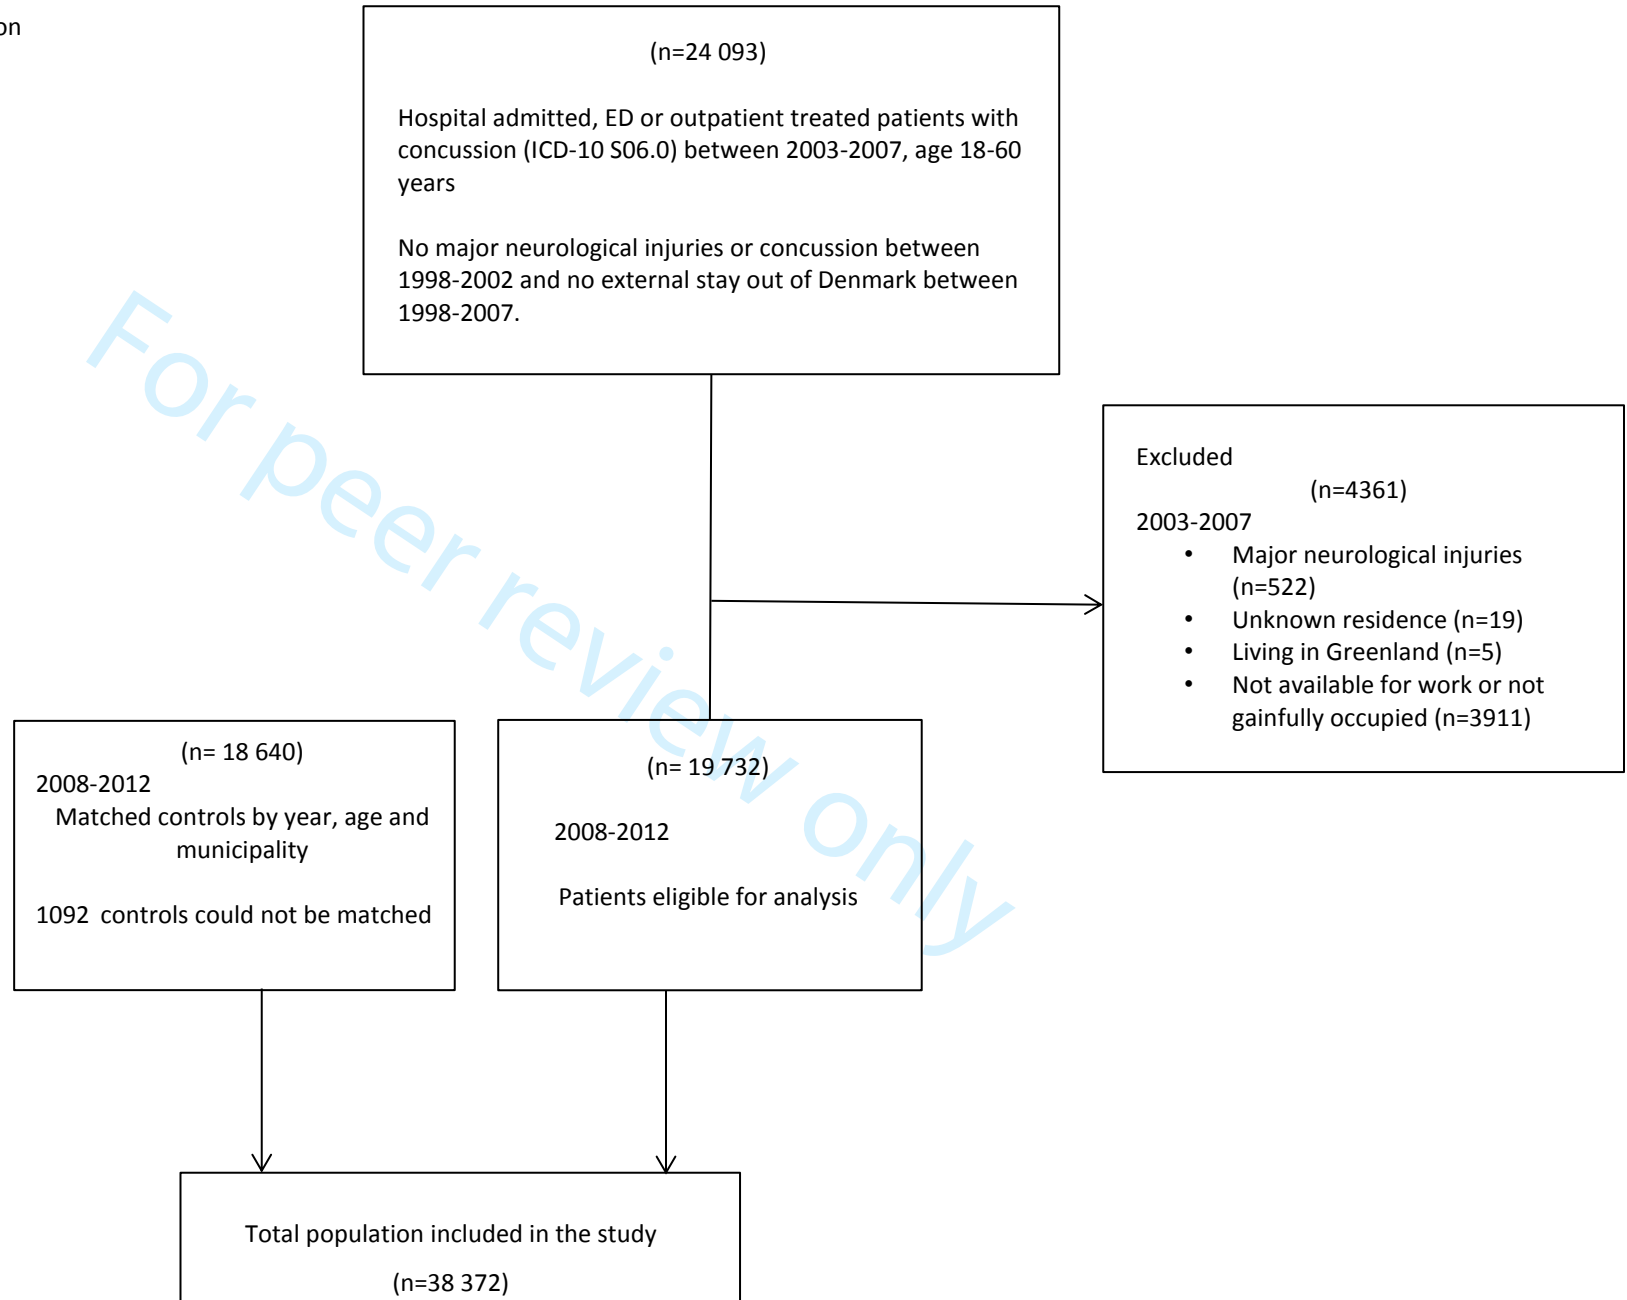

**Figure 3.** Prevalence and adjusted odds of not attending ordinary work at the index date and up to 5 years after concussion

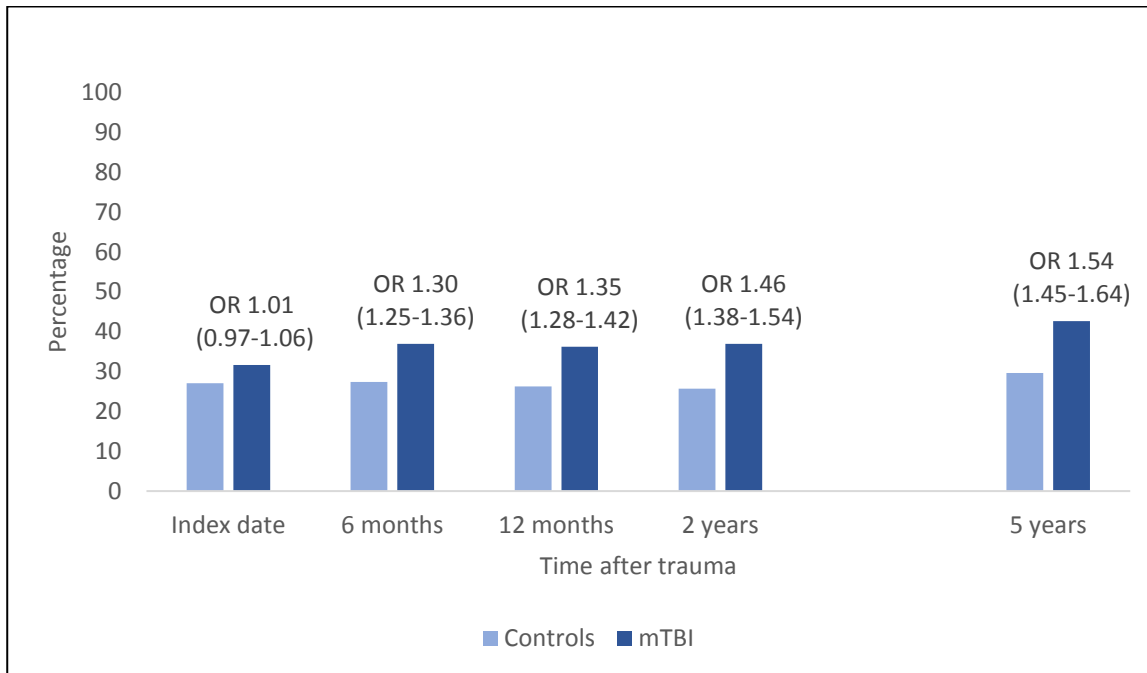



STROBE Statement—Checklist of items that should be included in reports of *cohort studies*

|                              | Item No | Recommendation                                                                                                                                                                                                                                                                                                         | Page No     |
|------------------------------|---------|------------------------------------------------------------------------------------------------------------------------------------------------------------------------------------------------------------------------------------------------------------------------------------------------------------------------|-------------|
| <b>Title and abstract</b>    | 1       | (a) Indicate the study's design with a commonly used term in the title or the abstract<br>(b) Provide in the abstract an informative and balanced summary of what was done and what was found                                                                                                                          | 1, 3<br>3-4 |
| <b>Introduction</b>          |         |                                                                                                                                                                                                                                                                                                                        |             |
| Background/rationale         | 2       | Explain the scientific background and rationale for the investigation being reported                                                                                                                                                                                                                                   | 6-7         |
| Objectives                   | 3       | State specific objectives, including any prespecified hypotheses                                                                                                                                                                                                                                                       | 7           |
| <b>Methods</b>               |         |                                                                                                                                                                                                                                                                                                                        |             |
| Study design                 | 4       | Present key elements of study design early in the paper                                                                                                                                                                                                                                                                | 3, 7        |
| Setting                      | 5       | Describe the setting, locations, and relevant dates, including periods of recruitment, exposure, follow-up, and data collection                                                                                                                                                                                        | 7-8         |
| Participants                 | 6       | (a) Give the eligibility criteria, and the sources and methods of selection of participants. Describe methods of follow-up<br>(b) For matched studies, give matching criteria and number of exposed and unexposed                                                                                                      | 7-9         |
| Variables                    | 7       | Clearly define all outcomes, exposures, predictors, potential confounders, and effect modifiers. Give diagnostic criteria, if applicable                                                                                                                                                                               | 9-13        |
| Data sources/<br>measurement | 8*      | For each variable of interest, give sources of data and details of methods of assessment (measurement). Describe comparability of assessment methods if there is more than one group                                                                                                                                   | 8-11        |
| Bias                         | 9       | Describe any efforts to address potential sources of bias                                                                                                                                                                                                                                                              | 7, 20       |
| Study size                   | 10      | Explain how the study size was arrived at                                                                                                                                                                                                                                                                              | 7, 8,<br>13 |
| Quantitative variables       | 11      | Explain how quantitative variables were handled in the analyses. If applicable, describe which groupings were chosen and why                                                                                                                                                                                           | 11,<br>12   |
| Statistical methods          | 12      | (a) Describe all statistical methods, including those used to control for confounding<br>(b) Describe any methods used to examine subgroups and interactions<br>(c) Explain how missing data were addressed<br>(d) If applicable, explain how loss to follow-up was addressed<br>(e) Describe any sensitivity analyses | 12,<br>13   |
| <b>Results</b>               |         |                                                                                                                                                                                                                                                                                                                        |             |
| Participants                 | 13*     | (a) Report numbers of individuals at each stage of study—eg numbers potentially eligible, examined for eligibility, confirmed eligible, included in the study, completing follow-up, and analysed<br>(b) Give reasons for non-participation at each stage<br>(c) Consider use of a flow diagram                        | 13-<br>14   |
| Descriptive data             | 14*     | (a) Give characteristics of study participants (eg demographic, clinical, social) and information on exposures and potential confounders<br>(b) Indicate number of participants with missing data for each variable of interest<br>(c) Summarise follow-up time (eg, average and total amount)                         | 13-<br>15   |
| Outcome data                 | 15*     | Report numbers of outcome events or summary measures over time                                                                                                                                                                                                                                                         | 15-<br>17   |

|    |                          |    |                                                                                                                                                                                                              |       |
|----|--------------------------|----|--------------------------------------------------------------------------------------------------------------------------------------------------------------------------------------------------------------|-------|
| 1  | Main results             | 16 | (a) Give unadjusted estimates and, if applicable, confounder-adjusted estimates and their precision (eg, 95% confidence interval). Make clear which confounders were adjusted for and why they were included | 15-17 |
| 2  |                          |    | (b) Report category boundaries when continuous variables were categorized                                                                                                                                    |       |
| 3  |                          |    | (c) If relevant, consider translating estimates of relative risk into absolute risk for a meaningful time period                                                                                             |       |
| 4  |                          |    |                                                                                                                                                                                                              |       |
| 5  |                          |    |                                                                                                                                                                                                              |       |
| 6  |                          |    |                                                                                                                                                                                                              |       |
| 7  |                          |    |                                                                                                                                                                                                              |       |
| 8  | Other analyses           | 17 | Report other analyses done—eg analyses of subgroups and interactions, and sensitivity analyses                                                                                                               | -     |
| 9  |                          |    |                                                                                                                                                                                                              |       |
| 10 | <b>Discussion</b>        |    |                                                                                                                                                                                                              |       |
| 11 |                          |    |                                                                                                                                                                                                              |       |
| 12 | Key results              | 18 | Summarise key results with reference to study objectives                                                                                                                                                     | 17-20 |
| 13 |                          |    |                                                                                                                                                                                                              |       |
| 14 | Limitations              | 19 | Discuss limitations of the study, taking into account sources of potential bias or imprecision. Discuss both direction and magnitude of any potential bias                                                   | 20    |
| 15 |                          |    |                                                                                                                                                                                                              |       |
| 16 | Interpretation           | 20 | Give a cautious overall interpretation of results considering objectives, limitations, multiplicity of analyses, results from similar studies, and other relevant evidence                                   | 17-20 |
| 17 |                          |    |                                                                                                                                                                                                              |       |
| 18 | Generalisability         | 21 | Discuss the generalisability (external validity) of the study results                                                                                                                                        | 20    |
| 19 |                          |    |                                                                                                                                                                                                              |       |
| 20 | <b>Other information</b> |    |                                                                                                                                                                                                              |       |
| 21 | Funding                  | 22 | Give the source of funding and the role of the funders for the present study and, if applicable, for the original study on which the present article is based                                                | 22    |
| 22 |                          |    |                                                                                                                                                                                                              |       |
| 23 |                          |    |                                                                                                                                                                                                              |       |

\*Give information separately for exposed and unexposed groups.

**Note:** An Explanation and Elaboration article discusses each checklist item and gives methodological background and published examples of transparent reporting. The STROBE checklist is best used in conjunction with this article (freely available on the Web sites of PLoS Medicine at <http://www.plosmedicine.org/>, Annals of Internal Medicine at <http://www.annals.org/>, and Epidemiology at <http://www.epidem.com/>). Information on the STROBE Initiative is available at <http://www.strobe-statement.org>.

# BMJ Open

## Labour market attachment after mild traumatic brain injury: Nationwide cohort study with 5-year register follow-up in Denmark

|                                 |                                                                                                                                                                                                                                                                                                                                                                                                                                                                                                                                                                                                                                                                                                                                                                                                                                                                                                                                                                                                                                                                                                                                             |
|---------------------------------|---------------------------------------------------------------------------------------------------------------------------------------------------------------------------------------------------------------------------------------------------------------------------------------------------------------------------------------------------------------------------------------------------------------------------------------------------------------------------------------------------------------------------------------------------------------------------------------------------------------------------------------------------------------------------------------------------------------------------------------------------------------------------------------------------------------------------------------------------------------------------------------------------------------------------------------------------------------------------------------------------------------------------------------------------------------------------------------------------------------------------------------------|
| Journal:                        | <i>BMJ Open</i>                                                                                                                                                                                                                                                                                                                                                                                                                                                                                                                                                                                                                                                                                                                                                                                                                                                                                                                                                                                                                                                                                                                             |
| Manuscript ID                   | bmjopen-2018-026104.R2                                                                                                                                                                                                                                                                                                                                                                                                                                                                                                                                                                                                                                                                                                                                                                                                                                                                                                                                                                                                                                                                                                                      |
| Article Type:                   | Research                                                                                                                                                                                                                                                                                                                                                                                                                                                                                                                                                                                                                                                                                                                                                                                                                                                                                                                                                                                                                                                                                                                                    |
| Date Submitted by the Author:   | 12-Mar-2019                                                                                                                                                                                                                                                                                                                                                                                                                                                                                                                                                                                                                                                                                                                                                                                                                                                                                                                                                                                                                                                                                                                                 |
| Complete List of Authors:       | <p>Graff, Heidi; University Hospital Rigshospitalet, Department of Anaesthesia, 4231, Centre of Head and Orthopaedics</p> <p>Siersma, Volkert; University of Copenhagen, Department of Public Health, The Research Unit for General Practice and Section of General Practice, University of Copenhagen, Denmark</p> <p>Møller, Anne; Copenhagen University Hospital Holbæk, Department of Occupational Medicine; University of Copenhagen, Department of Public Health, The Research Unit for General Practice and Section of General Practice, University of Copenhagen, Denmark</p> <p>Kragstrup, Jakob; University of Copenhagen, Department of Public Health, The Research Unit for General Practice and Section of General Practice</p> <p>Andersen, Lars; National Research Centre for the Working Environment; Aalborg University, Sport Sciences, Department of Health Science and Technology</p> <p>Egerod, Ingrid; University of Copenhagen, Intensive Care Unit, Rigshospitalet</p> <p>Malá, Hana; University of Copenhagen, Department of Psychology; University Hospital Bispebjerg-Frederiksberg, Department of Neurology</p> |
| <b>Primary Subject Heading</b>: | Neurology                                                                                                                                                                                                                                                                                                                                                                                                                                                                                                                                                                                                                                                                                                                                                                                                                                                                                                                                                                                                                                                                                                                                   |
| Secondary Subject Heading:      | Epidemiology, Neurology, Occupational and environmental medicine, Public health                                                                                                                                                                                                                                                                                                                                                                                                                                                                                                                                                                                                                                                                                                                                                                                                                                                                                                                                                                                                                                                             |
| Keywords:                       | Labour market attachment, Mild traumatic brain injury, Sickness absence, Post-concussive symptoms, Unemployment                                                                                                                                                                                                                                                                                                                                                                                                                                                                                                                                                                                                                                                                                                                                                                                                                                                                                                                                                                                                                             |
|                                 |                                                                                                                                                                                                                                                                                                                                                                                                                                                                                                                                                                                                                                                                                                                                                                                                                                                                                                                                                                                                                                                                                                                                             |

SCHOLARONE™  
Manuscripts

1  
2  
3  
4 **Labour market attachment after mild traumatic brain injury:**  
5  
6 **Nationwide cohort study with 5-year register follow-up in Denmark**  
7  
8  
9

10 Heidi Jeannet Graff, MSc in Public Health<sup>1,2</sup>

11 Volkert Siersma, Statistician<sup>3</sup>

12 Anne Møller, Assistant professor<sup>3,4</sup>

13 Jakob Kragstrup, Professor<sup>3</sup>

14 Lars Louis Andersen, Professor<sup>5,6</sup>

15 Ingrid Egerod, Professor<sup>7</sup>

16 Hana Malá Rytter, Associate Professor<sup>8,9</sup>

17  
18  
19  
20  
21  
22  
23  
24  
25  
26 **Affiliations:**

27  
28  
29 <sup>1</sup>Department of Anaesthesia, Centre of Head and Orthopaedics, Rigshospitalet, Copenhagen  
30 University Hospital, Denmark

31  
32  
33  
34  
35 <sup>2</sup>Trauma Center and Acute Admission, Centre of Head and Orthopaedics, Rigshospitalet,  
36 Copenhagen University Hospital, Denmark

37  
38  
39  
40  
41 <sup>3</sup>Department of Public Health, The Research Unit for General Practice and Section of General  
42 Practice, University of Copenhagen, Denmark

43  
44  
45  
46 <sup>4</sup>Department of Occupational Medicine, Copenhagen University Hospital Holbæk, Denmark

47  
48  
49 <sup>5</sup>National Research Centre for the Working Environment, Copenhagen, Denmark

50  
51  
52  
53  
54 <sup>6</sup>Sport Sciences, Department of Health Science and Technology, Aalborg University, Aalborg,  
55 Denmark

56  
57  
58  
59  
60 <sup>7</sup>Intensive Care Unit, Rigshospitalet, Copenhagen University Hospital, Denmark

1  
2  
3  
4<sup>8</sup>Department of Psychology, University of Copenhagen, Denmark  
5  
6

7<sup>9</sup>Department of Neurology, University Hospital Bispebjerg-Frederiksberg, Copenhagen, Denmark  
8  
9

10  
11 **Corresponding author:**  
12

13  
14 Heidi Jeannet Graff, University Hospital Rigshospitalet, Department of Anaesthesia, Blegdamsvej  
15  
16 9, 2100 Copenhagen, Denmark.  
17

18  
19 Phone: +45 40688504  
20

21 Email: heidi.jeannet.graff@regionh.dk  
22  
23

24  
25 **Word count:** 4026  
26  
27  
28  
29  
30  
31  
32  
33  
34  
35  
36  
37  
38  
39  
40  
41  
42  
43  
44  
45  
46  
47  
48  
49  
50  
51  
52  
53  
54  
55  
56  
57  
58  
59  
60

## ABSTRACT

**Objectives:** Sickness absence after mild traumatic brain injury (mTBI) is frequent due to post-concussive symptoms. We examined labour market attachment following mTBI up to 5 years post-injury.

**Design and setting:** Nationwide cohort study with register follow-up.

**Participants:** Patients between 18-60 years with mTBI (ICD-10 diagnosis S06.0) were extracted from the Danish National Patient Register (n=19 732). Controls were matched on sex, age and municipality (n=18 640). Patients with spinal cord and column injuries, TBI and concussions five-years pre-injury or as secondary diagnosis to the concussion in the inclusion period were excluded.

**Primary and secondary outcome measures:** Data were extracted from the DREAM register. Primary outcome was “not attending ordinary work” defined as receiving any social transfer payment. Secondary outcomes were health-related benefits, limited attachment to the labour market, permanent lack of attachment to the labour market and death.

**Results:** 5 years after diagnosis, 43% of patients were not attending ordinary work. The odds increased from 6 months (OR 1.30, 95% CI 1.24-1.36) to 5 years (OR 1.54, 95% CI 1.45-1.63). The odds of health-related benefits were 32% (OR 1.32, 95% CI 1.22-1.42) at 6 months and 22% (OR 1.22, 95% CI 1.12-1.33) at 5 years. Limited attachment to the labour market showed increased odds at 5 years (OR 1.38, 95% CI 1.27-1.51) and the odds of permanent lack of attachment to the labour market were higher for patients compared to controls, (OR 2.59, 95% CI 2.30-2.92). Death was more than two times higher at 5 years post-injury (OR 2.62, 95% CI 2.10-3.26).

1  
2  
3  
4 **Conclusions:**  
5

6 43% of concussed patients were not attending ordinary work 5 years post-injury and received health  
7 and social transfer benefits. We conclude that mTBI has a long-term impact on labour market  
8 attachment. Prevention and treatment of persisting post-concussive symptoms should be considered.  
9  
10  
11  
12  
13  
14  
15

16 ClinicalTrials.gov Identifier: NCT03214432  
17  
18  
19  
20  
21  
22  
23  
24  
25  
26  
27  
28  
29  
30  
31  
32  
33  
34  
35  
36  
37  
38  
39  
40  
41  
42  
43  
44  
45  
46  
47  
48  
49  
50  
51  
52  
53  
54  
55  
56  
57  
58  
59  
60

## ARTICLE SUMMARY

### Strengths and limitations of this study

- This was a nationwide cohort study with register-based follow-up including nearly 20 000 patients with mild traumatic brain injury (mTBI).
- The data were extracted from high-quality Danish national registers.
- This study estimated the prevalence and odds (OR) of not attending ordinary work, health-related benefits and death in patients with mTBI up to 5 years post-injury.
- This study had no access to patient records, with the inherent risk of misclassification.



## INTRODUCTION

Mild traumatic brain injury (mTBI) is a common neurological disease defined as an acute brain injury resulting from mechanical energy to the head from external physical force. Operational criteria include at least one of following: confusion or disorientation, loss of consciousness, post-traumatic amnesia (<24 hours), transient neurological abnormalities, absence of intracranial lesions not requiring surgery and Glasgow Coma Scale score of 13-15 post-injury.<sup>1</sup> Concussion (commotio cerebri) represents an entity, that is grouped under mTBI, although the pathophysiology behind may be dissimilar and heterogeneous. The differentiation remains elusive due to the usual absence of objective findings on conventional imaging. The clinical diagnosis of concussion is based on short-lasting alteration of consciousness and presence of posttraumatic amnesia and confusion.<sup>2, 3</sup> Despite recent efforts to improve the clinical diagnostic process,<sup>4, 5</sup> accurate diagnosis of mTBI is still a challenge due to frequent confounding factors.

Approximately 70-90% of all TBIs fall into the category of mTBI.<sup>6-8</sup> The incidence of hospital and emergency treated patients is 50-300 cases per 100 000 people in the US, Scandinavia and Australia<sup>8, 9</sup> and more frequent among young people and men.<sup>8</sup> However, these numbers probably fall short as studies also show numbers more than 700 cases per 100 000 people per year.<sup>8</sup>

Numerous studies have examined post-concussive symptoms in adults showing symptoms like dizziness, fatigue, insomnia, posttraumatic headache and memory and concentration difficulties<sup>10-12</sup> leading to long-term sickness and absence from work. Post-concussive symptoms result in an increased use of general practice services the first year post-injury, as reported by a Danish study.<sup>13</sup> In 15% of patients with mTBI, post-concussive symptoms are persistent (>12 months post-injury).<sup>14, 15</sup> Additionally, several risk factors are associated with persisting symptomatology, such as female gender, premorbid physical or psychiatric comorbidities, injury-related conditions, previous head injury, psychological distress, and drug and alcohol abuse.<sup>12, 16, 17</sup>

1  
2  
3  
4 Most patients return to work within the first couple of months after mTBI, but a small  
5  
6 proportion of patients is unable to return to work due to disability.<sup>18, 19</sup> Cancelliere et al. found that  
7  
8 most patients (>75%) had returned to work after six months and 5% were on social transfer  
9  
10 payments two years post-injury.<sup>20</sup>  
11  
12

13 Return to work (RTW) has been conceptualized as being a dynamic process with different  
14  
15 related outcomes of labour market attachment or time off work, but also outcomes related to the  
16  
17 process of return to work such as psychological functioning and job satisfaction.<sup>21, 22</sup> RTW after  
18  
19 mTBI has been suggested to depend on multiple factors such as injury related factors,<sup>20</sup> premorbid  
20  
21 demographics such as younger age,<sup>18</sup> work place related factors such as support,<sup>23</sup> and influence on  
22  
23 work planning<sup>24</sup> and patient characteristics such as psychosocial status.<sup>25</sup> These studies have  
24  
25 methodological limitations in study design which complicate evaluation of evidence regarding the  
26  
27 magnitude of the problem. They have small sample sizes, are not representative,<sup>10</sup> are based on self-  
28  
29 reported data and have short follow-up and considerable dropout leading to attrition bias.<sup>19</sup> The  
30  
31 present analysis overcomes these challenges by using Danish nationwide administrative data to  
32  
33 examine a larger, representative sample and to perform long-term follow up. This study is  
34  
35 concerned with labour market attachment in hospital treated patients receiving the diagnosis  
36  
37 concussion (commotio cerebri) as the only brain injury diagnosis.  
38  
39  
40  
41  
42

43 We examined a comprehensive range of post-injury transitions in the labour market aiming at  
44  
45 analysing attachment to the labour market up to five years after mTBI using a portfolio of  
46  
47 outcomes, including a variation of social transfer payments and data on permanent lack of  
48  
49 attachment to the labour market and death.  
50  
51  
52  
53  
54  
55  
56  
57  
58  
59  
60

## METHODS

The data used in the present analyses is obtained by linking several Danish national registers through the unique personal identification number (CPR number) assigned to all Danish citizens at birth or immigration, provided by the Danish Civil Registration System (CRS).<sup>26</sup>

### Study population

The study was a nationwide population-based cohort study of all mTBI cases in Denmark in the five-year inclusion period 1<sup>st</sup> of January 2003 – 31<sup>st</sup> of December 2007. Cases were identified in the Danish National Patient Register (DNPR) which contains information on all in- and outpatient contacts in Danish secondary care.<sup>27</sup> Notably, it codes each contact with International Classification of Diseases, version 10 (ICD-10) diagnosis codes. Patients with mTBI were included in the cohort based on their index date, the date of their first entry in the DNPR in the inclusion period with concussion (ICD-10 code S06.0) as primary diagnosis, excluding patients with diagnosis (primary or secondary) of cerebral oedema, diffuse and focal brain injury, subdural, epidural and subarachnoid haemorrhage, crushing injury and fracture of head, neck, skull, face and facial bones, and injuries of brain and cranial nerves in the inclusion period.<sup>9</sup> Included patients with mTBI were working-age adults between 18-60 years available for the labour market on the index date; the upper limit was set because individuals in Denmark older than 60 years are entitled to early retirement, if they have paid for such a scheme.<sup>28</sup> Availability for the labour market was defined as gainful employment or receiving unemployment benefits, but actively job seeking (see Figure 1). Furthermore, they were not hospital treated or diagnosed with other major neurological injuries such as spinal cord and column injuries<sup>29</sup> and traumatic brain injury (TBI) (including concussion)<sup>9</sup> in the five-year period 1<sup>st</sup> of January 1998 – 31<sup>st</sup> of December 2002 before the inclusion period<sup>9, 30</sup> since previous brain injury and neurological problems are found to be associated with prolonged

1  
2  
3  
4 symptoms.<sup>31</sup> Finally, patients were not included if they had lived outside of Denmark at any time  
5  
6 during the inclusion period and the five-year period before.  
7

8  
9 For each mTBI case in the cohort, a control was randomly selected from the Population  
10  
11 register. Controls had similar inclusion criteria as the cases, but they had no diagnosis of concussion  
12  
13 during the inclusion period 1<sup>st</sup> of January 2003 – 31<sup>st</sup> of December 2007.  
14

15  
16 The control was matched to the case on sex, municipality and age (year of birth  $\pm$  0.5 years,  
17  
18 expanded to 1 and 2 years in case of no initial match) (see Figure 1). The same exclusion criteria  
19  
20 were applied for the selection of controls.  
21  
22

23  
24  
25 Insert Figure 1  
26

27  
28 Availability for the labour market was assessed from the Danish Register for Evaluation of  
29  
30 Marginalization (DREAM), containing weekly information on all individuals receiving any social  
31  
32 public transfer payments.<sup>32</sup> Patients and their matching controls were excluded from the cohort if  
33  
34 there were any major neurological injuries<sup>9, 29</sup> as secondary diagnoses at the index date, they were  
35  
36 unavailable for the labour market, they had unknown residence or were inhabitants of Greenland.  
37  
38

## 39 40 41 **Outcome measures**

42  
43  
44 The outcomes of the present analyses were assessments of variations in attachment to the labour  
45  
46 market evaluated in the DREAM database (Figure 1) the week before the case's index date, and at 6  
47  
48 months, 12 months, 2 years and 5 years after the case's index date (Figure 1).  
49

### 50 51 **Not attending ordinary work**

52  
53 1. "Not attending ordinary work" was the primary outcome and was indicated by any entry in  
54  
55 DREAM, i.e. receiving any social transfer payment, such as unemployment benefits unrelated to the  
56  
57 subject's health condition, sickness absence benefits, social benefits granted, short and long-term  
58  
59  
60

1  
2  
3  
4 sickness or death. If there was no DREAM entry, it was assumed that the subject was gainfully  
5  
6 employed or self-supporting at that time (Figure 1).  
7  
8  
9

10  
11 The set of secondary outcomes are defined increasingly narrower than the primary outcome and  
12  
13 focus on attachment to the labour market due to health conditions. At the time of the current study,  
14  
15 employers in Denmark were obliged to finance sickness benefits for the first 30 days. Sickness  
16  
17 benefits lasting more than four consecutive weeks were to be compensated by the Danish  
18  
19 municipalities.<sup>33</sup> Sick-listed individuals could receive sickness benefits for a maximum of one  
20  
21 year<sup>34</sup>. If individuals were not able to return to ordinary work due to long-term limited work  
22  
23 capacity, a partial return to work at lower capacity was possible with a “flex job”. If the sick-listed  
24  
25 individual was not able to return to work at all, the municipality could grant disability pension.<sup>35, 36</sup>  
26  
27  
28  
29 The grading of the outcomes is illustrated in Figure 1.  
30  
31  
32  
33

#### 34 Health-related benefits

35  
36 2. Health-related benefits were indicated by DREAM entries given for short- or long-term  
37  
38 restrictions in attachment to the labour market due to health conditions (excluding unemployment  
39  
40 benefits unrelated to the subject’s health condition). These were sickness absence benefits,  
41  
42 vocational rehabilitation, flex job, unemployment benefits specifically granted to citizens on flex  
43  
44 job, social security benefits, light duties, disability pension and death.  
45  
46  
47  
48  
49

#### 50 Limited attachment to the labour market

51  
52 3. Social transfer payments due to limited attachment to the labour market were indicated by  
53  
54 DREAM entries given for reduced work capacity and thereby long-term restrictions in attachment  
55  
56 to the labour market due to health conditions (excluding sickness absence benefits compared to  
57  
58  
59  
60

1  
2  
3  
4 secondary outcome 2). These were vocational rehabilitation, flex job, unemployment benefits  
5  
6 specifically granted to citizens on flex job, social security benefits, light duties, disability pension  
7  
8 and death.  
9

10  
11  
12  
13 Permanent lack of attachment to the labour market

14  
15  
16 4. Permanent lack of attachment to the labour market was indicated by DREAM entries given for  
17  
18 permanent withdrawal from the labour market due to health conditions. These were disability  
19  
20 pension and death.  
21  
22

23  
24  
25 Death

26  
27 5. Death was indicated by the DREAM entry for death.  
28  
29  
30  
31

### 32 **Potential confounders**

33  
34 Sex, age and municipality at the index date were obtained from the Population register linked to the  
35  
36 DNPR. The municipality information was categorized into five regions reflecting Denmark's  
37  
38 reform of local government structure from 2007.<sup>37</sup> From the index date calendar year and season  
39  
40 were derived. Calendar year was included in the model as a previous study found increasing odds of  
41  
42 returning to work during the study period.<sup>38</sup> The reason could be a change in diagnostic practice and  
43  
44 the Danish sickness benefit Act becoming more effective over the years. Seasonal variation was  
45  
46 considered a confounder, as a previous study suggested that TBI is associated with season-specific  
47  
48 activities and most pronounced during fall and winter.<sup>39</sup> Pre-injury income was measured at the  
49  
50 index date and taken as personal gross income including revenue and social transfer income and  
51  
52 was obtained from the Income Statistics Register.<sup>40</sup> Income was divided into four income groups:  
53  
54 <100 000, 100 000-200 000, 200 000-300 000, >300 000 DKK roughly reflecting the quartiles in  
55  
56  
57  
58  
59  
60

1  
2  
3  
4 the present cohort. Information on the highest attained educational level was obtained from the  
5  
6 Danish Education Register<sup>41</sup> and was categorized into three educational groups: low education  
7  
8 (primary education), medium education (lower and upper secondary education, post-secondary–  
9  
10 non-tertiary education) and high education (short cycle tertiary education, bachelor, master, doctoral  
11  
12 or equivalent). Information on cohabitation status and ethnic origin was obtained from the Danish  
13  
14 Family Relations Database<sup>26, 42</sup> and was categorized into married or cohabiting couple and single,  
15  
16 and as Danish born and not Danish born respectively. Pre-injury illness burden was measured by  
17  
18 Charlson comorbidity index (CCI), a weighted sum of 19 indicators for selected diagnoses.<sup>43, 44</sup> For  
19  
20 the present CCI evaluation, a diagnosis was indicated for an individual when a corresponding ICD-  
21  
22 10 code was encountered in the DNPR in the five-year period 1<sup>st</sup> of January 1998 – 31<sup>st</sup> of  
23  
24 December 2002 before the inclusion period. Psychiatric diagnoses are not incorporated in CCI but  
25  
26 are possible confounders related to both labour market attachment and an increased risk of TBI.<sup>45, 46</sup>  
27  
28 Hence, information on psychiatric diagnoses separately from CCI was obtained from the DNPR  
29  
30 (any ICD-10 Classification of Mental and Behavioural Disorders indicated as F diagnosis) over the  
31  
32 same five-year period.  
33  
34  
35  
36  
37  
38  
39

### 40 **Statistical analysis**

41  
42 Baseline covariates at the index date, and the outcomes at the index date and the follow-up time  
43  
44 points were reported as numbers and percentages separately for mTBI patients and their matched  
45  
46 controls. Raw comparisons of the baseline covariates between the mTBI patients and their controls  
47  
48 are done by Chi-squared tests.  
49

50  
51 The difference in tendency of some degree of decreased attachment to the labour market, between  
52  
53 patients with mTBI and their controls, at each of the index date and the four follow-up time points,  
54  
55 was assessed by odds ratios (OR) and corresponding 95% confidence intervals (95%CI) from a  
56  
57 multivariable logistic regression model; an OR>1 implied higher odds for the mTBI group. The  
58  
59  
60

1  
2  
3  
4 model was parameterized so that the assessments at the four follow-up time points were adjusted for  
5  
6 differences already present at the index date, i.e. pre-injury differences. Hence, the assessment at  
7  
8 the index date can be viewed as an assessment of the employment aspect of a social gradient in  
9  
10 mTBI incidence; the assessments at the follow-up time points report on the short- and long-term  
11  
12 differences in attachment attributable to mTBI. Results are reported both unadjusted and adjusted  
13  
14 for the potential confounders: age, gender, municipality, seasonal variation, calendar year,  
15  
16 education, income, cohabitation status, ethnicity, pre-injury comorbidities and pre-injury psychiatric  
17  
18 diagnosis. Inference was done by generalized estimating equations to adjust for repeated  
19  
20 measurement and matching.  
21  
22  
23

24  
25 Subjects with missing values in one of the covariates were omitted from analyses where these  
26  
27 covariates were included. P-values below 0.05 were considered statistically significant. SAS version  
28  
29 9.4 was used for statistical analysis.  
30  
31  
32

### 33 34 **Patient and public involvement**

35  
36 Patients and the public were not involved in the design and the conduct of the study.  
37  
38  
39

## 40 41 **RESULTS**

### 42 43 **Baseline characteristics of the population**

44  
45 19 732 patients with mTBI were eligible for the cohort and 18 640 matching controls were included  
46  
47 in the study. In some cases, notably with patients from small municipalities, it was not possible to  
48  
49 find a matching control, see Figure 2. Overall, the cohort was characterized by a weak tendency in  
50  
51 patients with mTBI to have lower education, lower income, being married or cohabiting, and having  
52  
53 a higher prevalence of pre-injury diseases (both somatic diseases as captured by CCI and  
54  
55 psychiatric diseases) compared to their matched controls (Table 1).  
56  
57  
58  
59  
60



## Insert Figure 2 (flow-chart)

| <b>Table 1. Social and pre-injury health characteristics of patients with mTBI and controls</b> |                            |                        |                         |                |                            |
|-------------------------------------------------------------------------------------------------|----------------------------|------------------------|-------------------------|----------------|----------------------------|
|                                                                                                 | <b>Controls (n=18 640)</b> | <b>mTBI (n=19 732)</b> | <b>Total (n=38 372)</b> | <b>Missing</b> | <b>p-value<sup>1</sup></b> |
| <b>Age, n(%)</b>                                                                                |                            |                        |                         |                | 0.8461                     |
| 18-29 years                                                                                     | 8187 (43.92)               | 8734 (44.26)           | 16 921 (44.10)          | 0              |                            |
| 30-39 years                                                                                     | 4118 (22.09)               | 4290 (21.74)           | 8408 (21.91)            |                |                            |
| 40-49 years                                                                                     | 3458 (18.55)               | 3653 (18.51)           | 7111 (18.53)            |                |                            |
| 50-60 years                                                                                     | 2877 (15.43)               | 3055 (15.48)           | 5932 (15.46)            |                |                            |
| <b>Gender, n(%)</b>                                                                             |                            |                        |                         |                | 0.5839                     |
| Men                                                                                             | 11 266 (60.44)             | 11 872 (60.17)         | 23 138 (60.30)          | 0              |                            |
| Women                                                                                           | 7374 (39.56)               | 7860 (39.83)           | 15 234 (39.70)          |                |                            |
| <b>Education, n(%)</b>                                                                          |                            |                        |                         |                | <.0001                     |
| Low education                                                                                   | 6942 (37.73)               | 8951 (46.14)           | 15 893 (42.05)          | 574            |                            |
| Medium education                                                                                | 7992 (43.43)               | 7464 (38.48)           | 15 456 (40.89)          |                |                            |
| High education                                                                                  | 3466 (18.84)               | 2983 (15.38)           | 6449 (17.06)            |                |                            |
| <b>Income (Danish kroner, DKK<sup>2</sup>), n(%)</b>                                            |                            |                        |                         |                | <.0001                     |
| <100.000                                                                                        | 4144 (22.27)               | 4482 (22.72)           | 8626 (22.50)            | 40             |                            |
| 100.000-200.000                                                                                 | 4152 (22.31)               | 5697 (28.89)           | 9849 (25.69)            |                |                            |
| 200.000-300.000                                                                                 | 5325 (28.62)               | 5418 (27.47)           | 10 743 (28.03)          |                |                            |
| >300.000                                                                                        | 4988 (26.80)               | 4126 (20.92)           | 9114 (23.78)            |                |                            |
| <b>Cohabitation status, n(%)</b>                                                                |                            |                        |                         |                | <.0001                     |
| Married or cohabiting couple                                                                    | 5701 (30.68)               | 8051 (40.83)           | 13 752 (35.90)          | 70             |                            |
| Single                                                                                          | 12 884 (69.32)             | 11 666 (59.17)         | 24 550 (64.10)          |                |                            |
| <b>Ethnic origin, n(%)</b>                                                                      |                            |                        |                         |                | 0.5772                     |
| Danish born                                                                                     | 17 659 (95.02)             | 18 710 (94.89)         | 36 369 (94.95)          | 70             |                            |
| Born abroad                                                                                     | 926 (4.98)                 | 1007 (5.11)            | 1933 (5.05)             |                |                            |
| <b>CCI (categorical), n(%)</b>                                                                  |                            |                        |                         |                | <.0001                     |
| No comorbidities                                                                                | 17 863 (95.83)             | 18 580 (94.16)         | 36 443 (94.97)          | 0              |                            |
| 1 comorbidity                                                                                   | 577 (3.10)                 | 842 (4.27)             | 1419 (3.70)             | 0              |                            |
| 2 comorbidities                                                                                 | 154 (0.83)                 | 210 (1.06)             | 364 (0.95)              | 0              |                            |
| ≥3 comorbidities                                                                                | 46 (0.25)                  | 100 (0.51)             | 146 (0.38)              | 0              |                            |
| <b>Psychiatric diagnosis, n(%)</b>                                                              |                            |                        |                         |                | <.0001                     |
| No diagnosis                                                                                    | 18 345 (98.42)             | 18 540 (93.96)         | 36 885 (96.12)          | 0              |                            |
| ≥1 diagnosis                                                                                    | 295 (1.58)                 | 1192 (6.04)            | 1487 (3.88)             |                |                            |

<sup>1</sup> P-value from a Pearson's chi-squared test

<sup>2</sup> Currency exchange rate of May 2018: 1 EUR = 7.44834 DKK

1  
2  
3  
4  
5  
6  
7  
8  
9  
10  
11  
12  
13  
14  
15  
16  
17  
18  
19  
20  
21  
22  
23  
24  
25  
26  
27  
28  
29  
30  
31  
32  
33  
34  
35  
36  
37  
38  
39  
40  
41  
42  
43  
44  
45  
46  
47  
48  
49  
50  
51  
52  
53  
54  
55  
56  
57  
58  
59  
60

**Analysis of attachment to labour market**

Table 2 shows the prevalence for each outcome for patients and controls during 5 years of follow-up.

For peer review only

**Table 2. Prevalence of labour market attachment and death in patients with mTBI and controls at 6 and 12 months and 2 and 5 years post-injury**

|                                                          | Controls (n=18 640) <sup>1</sup> | mTBI (n=19 732) <sup>1</sup> | Crude OR (95% CI)  | p-value | Adjusted OR (95% CI) <sup>2</sup> | p-value |
|----------------------------------------------------------|----------------------------------|------------------------------|--------------------|---------|-----------------------------------|---------|
| <b>Not attending ordinary work</b>                       |                                  |                              |                    |         |                                   |         |
| Index date, n(%)                                         | 5040 (27.04)                     | 6247 (31.66)                 | 1.25 (1.20-1.30)   | <.0001  | 1.01 (0.97-1.06)                  | 0.5406  |
| 6 months, n(%)                                           | 5107 (27.40)                     | 7289 (36.94)                 | 1.24 (1.20-1.29)   | <.0001  | 1.30 (1.25-1.36)                  | <.0001  |
| 12 months, n(%)                                          | 4898 (26.28)                     | 7149 (36.23)                 | 1.28 (1.22-1.33)   | <.0001  | 1.35 (1.28-1.42)                  | <.0001  |
| 2 years, n(%)                                            | 4793 (25.71)                     | 7297 (36.98)                 | 1.36 (1.29-1.42)   | <.0001  | 1.46 (1.38-1.54)                  | <.0001  |
| 5 years, n(%)                                            | 5520 (29.61)                     | 8420 (42.67)                 | 1.42 (1.35-1.49)   | <.0001  | 1.54 (1.45-1.64)                  | <.0001  |
| <b>Health-related benefits</b>                           |                                  |                              |                    |         |                                   |         |
| Index date, n(%)                                         | 795 (4.27)                       | 2230 (11.30)                 | 2.85 (2.62-3.10)   | <.0001  | 2.07 (1.90-2.25)                  | <.0001  |
| 6 months, n(%)                                           | 1120 (6.01)                      | 3600 (18.24)                 | 1.21 (1.13-1.29)   | <.0001  | 1.32 (1.22-1.42)                  | <.0001  |
| 12 months, n(%)                                          | 1197 (6.42)                      | 3584 (18.16)                 | 1.12 (1.04-1.20)   | 0.0020  | 1.22 (1.13-1.32)                  | <.0001  |
| 2 years, n(%)                                            | 1336 (7.17)                      | 3790 (19.21)                 | 1.07 (0.99-1.15)   | 0.0968  | 1.17 (1.08-1.27)                  | 0.0002  |
| 5 years, n(%)                                            | 1676 (8.99)                      | 4649 (23.56)                 | 1.08 (1.00-1.17)   | 0.0528  | 1.22 (1.12-1.33)                  | <.0001  |
| <b>Limited attachment to the labour market</b>           |                                  |                              |                    |         |                                   |         |
| Index date, n(%)                                         | 795 (4.27)                       | 2230 (11.30)                 | 2.86 (2.64-3.11)   | <.0001  | 1.93 (1.76-2.10)                  | <.0001  |
| 6 months, n(%)                                           | 816 (4.38)                       | 2326 (11.79)                 | 1.01 (0.95-1.08)   | 0.8162  | 1.02 (0.96-1.09)                  | 0.5123  |
| 12 months, n(%)                                          | 846 (4.54)                       | 2388 (12.10)                 | 1.00 (0.94-1.07)   | 0.9858  | 1.03 (0.96-1.11)                  | 0.3815  |
| 2 years, n(%)                                            | 884 (4.74)                       | 2784 (14.11)                 | 1.14 (1.06-1.23)   | 0.0005  | 1.23 (1.13-1.33)                  | <.0001  |
| 5 years, n(%)                                            | 1192 (6.39)                      | 3787 (19.19)                 | 1.20 (1.11-1.30)   | <.0001  | 1.39 (1.27-1.51)                  | <.0001  |
| <b>Permanent lack of attachment to the labour market</b> |                                  |                              |                    |         |                                   |         |
| Index date, n(%)                                         | 0 (0)                            | 0 (0)                        | .                  | .       | .                                 | .       |
| 6 months, n(%)                                           | 33 (0.18)                        | 82 (0.42)                    | 3.40 (2.36-4.90)   | <.0001  | 1.90 (1.36-2.66)                  | 0.0002  |
| 12 months, n(%)                                          | 58 (0.31)                        | 173 (1.88)                   | 3.63 (2.77-4.75)   | <.0001  | 2.14 (1.66-2.77)                  | <.0001  |
| 2 years, n(%)                                            | 117 (0.63)                       | 424 (2.15)                   | 4.20 (3.49-5.05)   | <.0001  | 2.61 (2.17-3.14)                  | <.0001  |
| 5 years, n(%)                                            | 299 (1.60)                       | 1068 (5.41)                  | 3.67 (3.28-4.11)   | <.0001  | 2.59 (2.30-2.92)                  | <.0001  |
| <b>Death</b>                                             |                                  |                              |                    |         |                                   |         |
| Index date, n(%)                                         | 0 (0)                            | 0 (0)                        | .                  | .       | .                                 | .       |
| 6 months, n(%)                                           | 5 (0.03)                         | 59 (0.30)                    | 11.46 (4.38-29.94) | <.0001  | 6.37 (2.71-14.96)                 | <.0001  |
| 12 months, n(%)                                          | 12 (0.06)                        | 100 (0.51)                   | 8.03 (4.29-15.05)  | <.0001  | 4.67 (2.59-8.40)                  | <.0001  |
| 2 years, n(%)                                            | 26 (0.14)                        | 207 (1.05)                   | 7.67 (5.01-11.75)  | <.0001  | 4.72 (3.12-7.13)                  | <.0001  |
| 5 years, n(%)                                            | 118 (0.63)                       | 477 (2.42)                   | 3.91 (3.17-4.82)   | <.0001  | 2.62 (2.11-3.26)                  | <.0001  |

<sup>1</sup>Prevalence expressed as the total number and percentage of patients and controls experiencing the outcome

<sup>2</sup>Generalized estimating equation model with odds ratio of the outcome event in patients compared to controls adjusted for age, gender, municipality, seasonal variation, calendar year, education, income, cohabitation status, ethnicity, comorbidities and pre-injury psychiatric diagnosis

## Primary outcome

### *Not attending ordinary work*

It can be seen from table 2 and figure 3 that patients compared to controls had an overall higher increase of not attending ordinary work from the index date (32%, 27%) to 5 years post-injury (43%, 30%) (Table 2) (Figure 3). Compared to the secondary outcomes, the prevalence was higher for not attending ordinary work which included social transfer payments that were not health related. For the unadjusted model, there were 25% higher odds of not attending ordinary work (OR 1.25, 95% CI 1.19-1.30) for patients compared to controls at the index date. However, for the adjusted model, no differences were seen between groups at the index date. During the 5 year of follow-up, the odds of not attending ordinary work increased, and at 5 years the odds were 54% higher (OR 1.54, 95% CI 1.45-1.63) among patients with mTBI (Table 2) (Figure 3) compared to controls.

Insert Figure 3

## Secondary outcomes

### *Health-related benefits*

The overall prevalence of health-related benefits was significantly higher for patients (11%) compared to controls (4%) at the index date, and the difference between groups continued during follow-up. The odds of health-related benefits were more than two times higher (OR 2.07, 95% CI 1.90-2.25) at the index date even after adjustment for potential socio-economic confounders and the odds of health-related benefits continued to stay elevated during follow-up. Table 2.

### *Limited attachment to the labour market*

For social transfer payments related to limited attachment to the labour market, the prevalence was also higher for patients (11%) compared to controls (4%) at the index date and slightly increased during follow-up. The adjusted OR was almost two times higher at the index date for patients compared to controls (OR 1.92, 95% CI 1.76-2.10). However, the long-term effect of mTBI on limited attachment to the labour market was most pronounced at 2 years and 5 years.

### *Permanent lack of attachment to the labour market*

During follow-up, a higher prevalence of permanent lack of attachment to the labour market was seen in patients compared to controls, which increased from 6 months to 5 years. At 6 months the adjusted odds for permanent lack of attachment to the labour market was almost two times higher for patients (OR 1.90, 95% CI 1.36-2.66) and the long-term perspective continued showing large effect.

### *Death*

The prevalence of death was higher among patients showing an increase from 0.30% at 6 months to 2.42% at 5 years. The adjusted odds for death for patients with mTBI was six-fold increased at 6 months follow-up (OR 6.37 95% CI 2.71-14.95) and the long-term effects continued to be large but diminishing during follow-up.

## **DISCUSSION**

We examined short and long-term labour market attachment in a large cohort of working-age patients with mTBI up to 5 years post-injury compared to the general population. The proportion of approximately 20 000 included patients in this study are difficult to compare to previous studies, since these mostly report incidence rates.<sup>8</sup> However, a Danish study included 10 000 patients in

1  
2  
3  
4 1994 and 2002,<sup>9</sup> and another Danish register-based study included approximately 90 000 patients  
5  
6 during a 13-year follow-up period.<sup>13</sup>  
7

8  
9 We found that attachment to the labour market varied between patients and controls at the  
10  
11 date of injury. The odds of not attending ordinary work was increased by 25% and remained higher  
12  
13 for patients during the 5 years of follow-up (of about 40%). A social gradient in not attending  
14  
15 ordinary work at the index date could be suspected, as patients had a significantly lower educational  
16  
17 level, income and more comorbidities compared to controls (see Table 1). Our findings agree with a  
18  
19 Danish register-based cohort study<sup>13</sup> demonstrating that individuals with mTBI had a higher use of  
20  
21 general practice even 5 years before mTBI. However, when we controlled for socio-economic  
22  
23 factors, comorbidities and psychiatric diagnoses, there were no difference in the odds of not  
24  
25 attending ordinary work between the two groups in our sample at index date. Yet, the adjusted odds  
26  
27 of not attending ordinary work remained increased by 30-50% during the 5 years follow-up. This  
28  
29 strongly supports that mTBI is the incident leading to not returning to work.  
30  
31  
32  
33

34 For the secondary outcomes, the prevalence of sick listed decreased during follow-up, while  
35  
36 the prevalence of limited and permanent lack of attachment to the labour market increased as  
37  
38 expected. The proportion of individuals receiving health-related benefits at the index date was also  
39  
40 higher for patients compared to controls, and the risk was more than two times higher for patients  
41  
42 even after controlling for possible confounders. This may indicate increased morbidity in patients  
43  
44 with mTBI prior to the trauma as seen in another Danish study<sup>13</sup>, and variations in health seeking  
45  
46 behavior which result in health-related social transfer payments. However, at 6 months the odds  
47  
48 diminished to 30% and were further decreased during follow-up to 16-20%. Stulemeijer et al. found  
49  
50 a 76% full RTW rate at 6 months,<sup>47</sup> De Koning et al. found a complete RTW rate of 77% at 12  
51  
52 months<sup>48</sup> and Losoi et al. also found that 97% had fully RTW by 12 months after mTBI.<sup>10</sup> These  
53  
54 findings are slightly higher than those reported in this study. However, previous investigations are  
55  
56  
57  
58  
59  
60

1  
2  
3  
4 not directly comparable because there is a lack of consistency in definitions of labour market  
5 attachment and RTW measures. RTW is increasingly regarded as an evolving process consisting of  
6 different phases such as off work, work reentry, retention and advancement.<sup>49</sup> Additionally,  
7 differences between countries in registration of social transfer payments, political legislation and  
8 socioeconomic differences can complicate comparison.<sup>20</sup>

9  
10  
11  
12  
13  
14  
15  
16 Theadom et al. found that work productivity was reduced by 15.5% among patients with  
17 mTBI, who had to make job changes to continue working.<sup>50</sup> Our study found a long-term  
18 prevalence of 19% and increased odds of almost 40% of limited attachment to the labour market  
19 indicating long-term employment restrictions due to health conditions. These results indicate that  
20 most patients return to work after mTBI, but a small proportion of patients suffer long-term  
21 consequences related to mTBI, preventing them from fully re-integrating into the labour market.  
22 Since a previous study indicates an association between increasing length of sickness absence and  
23 increasing risk of disability pension,<sup>51</sup> these patients are at risk of transitioning from temporary to  
24 permanent social benefits, meaning an exit from the labour market. For permanent lack of  
25 attachment to the labour market, the prevalence in our study was higher for patients even though  
26 there were significantly fewer events especially at 6 and 12 months and 2 years, indicating that it  
27 takes time to qualify for disability pension in Denmark. The odds of permanent lack of attachment  
28 to the labour market were still more than twice as high in the short as well as the long-term among  
29 patients with mTBI, even when controlled for potential confounders.

30  
31  
32  
33  
34  
35  
36  
37  
38  
39  
40  
41  
42  
43  
44  
45  
46  
47  
48 Finally, the prevalence of death was higher in patients compared to controls. The odds of death  
49 were more than 6 times higher for patients and subsequently declined during follow-up. This is a  
50 surprising result assumed to be predicted by a set of different factors (socio-economic indicators,  
51 comorbidities etc.) than those predicting labour market attachment. Selassie et al. found an in-  
52 hospital all-cause mortality rate after mTBI of 1.4%<sup>52</sup> and Pentland et al. found similar results at  
53  
54  
55  
56  
57  
58  
59  
60

1  
2  
3  
4 0.45% in a cohort with 21 years of follow up,<sup>53</sup> agreeing with the result found in the present study.

5  
6 Additionally, a Danish study found an increased risk of suicide among patients with mTBI<sup>54</sup>.

7  
8 Although not the aim of the present study, future research may benefit from exploring the risk  
9  
10 factors in excess mortality in patients with mTBI.  
11  
12  
13  
14

### 15 16 **Strengths and limitations**

17  
18 This study applied a register-based design preventing information bias in the collection of data. The  
19  
20 DREAM register enabled us to estimate point prevalence during 5 years of follow-up and to  
21  
22 examine much more diverse labour market outcomes which is infrequent in TBI research.<sup>20</sup>  
23

24  
25 Furthermore, the sensitivity and specificity of the DREAM register is considered high.<sup>55</sup> Finally, the  
26  
27 use of national register data has made it possible to include a large sample size and a matching  
28  
29 control group which increased the statistical power. We also adjusted for a wide range of pre-injury  
30  
31 potential confounders. However, residual confounding such as injury mechanism and psychological  
32  
33 effects affecting outcome cannot be ruled out. Patients were extracted from the DNPR.  
34

35  
36 Consequently, we did not have access to patient records, which hindered us to apply the operational  
37  
38 case definition for mTBI suggested by WHO.<sup>4</sup> Even though the DNPR is considered the most  
39  
40 comprehensive register of its kind,<sup>27</sup> its validity and consistency with clinical diagnoses are widely  
41  
42 discussed, especially regarding clinical diagnoses and inaccurate coding leading to  
43  
44 misclassification. The ICD-9 code (850) for concussion has in several studies been reported as  
45  
46 frequently used for the classification of mTBI<sup>4, 56</sup> but has also shown lack of sensitivity and  
47  
48 specificity.<sup>4</sup> This could also be expected to be the case for ICD-10. Additionally, a large proportion  
49  
50 of patients with mTBI are not treated at the hospital, some are treated in primary care settings, and  
51  
52 some refrain from consulting a physician,<sup>57</sup> which can lead to low incidence rates and selection  
53  
54 bias, limiting the generalizability of the results.<sup>58</sup>  
55  
56  
57  
58  
59  
60



## Implications

A small proportion of patients with mTBI may suffer from persistent post-concussive symptoms for months and years after injury, preventing returning to previous work.<sup>17, 46, 59</sup> This study showed that patients with mTBI have a higher prevalence of receiving social transfer payments compared to the general population post-injury. In Denmark there are no national guidelines for the treatment and rehabilitation of patients with mTBI. This is in contrast to the guidelines developed for patients suffering more severe forms of TBI. We therefore assume that the treatment trajectory in patients with mTBI is lengthy and inefficient, as it is highly dependent on referrals from general practitioners, insurance companies and the municipalities. Our data suggest that patients with mTBI needs a comprehensive and coordinated approach, including the identification of patients at risk of developing persistent post-concussive symptoms and initiation of a treatment plan in a timely fashion. Future research should focus on examining the contributory causes as to why patients with mTBI do not return to work.

## CONCLUSIONS

Most patients returned to work after mTBI. However, a small proportion of patients with mTBI received social transfer payments related to health and work disability to a higher extent than the general population at 5 years post-injury. Additionally, the prevalence of death was increased during follow-up. Initiatives that identify and prevent the progression of persistent post-concussive symptoms should be considered to reduce lack of attachment to the labour market in this patient group.

1  
2  
3  
4  
5  
6  
7  
8  
9  
10  
11  
12  
13  
14  
15  
16  
17  
18  
19  
20  
21  
22  
23  
24  
25  
26  
27  
28  
29  
30  
31  
32  
33  
34  
35  
36  
37  
38  
39  
40  
41  
42  
43  
44  
45  
46  
47  
48  
49  
50  
51  
52  
53  
54  
55  
56  
57  
58  
59  
60

## **ETHICS APPROVAL**

The study was approved by the Danish Data Protection Agency (Datatilsynet) no. (05179- RH-2016-389). The study protocol was registered on clinicaltrial.gov on July 5, 2017 (ClinicalTrials.gov Identifier: NCT03214432).

## **Acknowledgements**

### **Competing interest statement**

None declared

### **Patient consent**

Not required

### **Funding**

This work was supported by the Research Foundation, Rigshospitalet (E-22260-03) (E-23473-01), the Danish Health Foundation (Helsefonden) (16-B-0050) and the Aase and Ejnar Danielsen Foundation (20-000054).

### **Contributors**

All authors participated in the study design, interpretation of the data, revising it critically and the final approval of the manuscript to be published. HJG obtained the funding, drafted the protocol and manuscript and collaborated with VS on performing the statistical analyses. AM, LA, JK, IE and HMR participated in the study design and conceptualization.

1  
2  
3  
4 **Data sharing statement**  
5

6 No additional data are available  
7  
8  
9  
10  
11  
12  
13  
14  
15  
16  
17  
18  
19  
20  
21  
22  
23  
24  
25  
26  
27  
28  
29  
30  
31  
32  
33  
34  
35  
36  
37  
38  
39  
40  
41  
42  
43  
44  
45  
46  
47  
48  
49  
50  
51  
52  
53  
54  
55  
56  
57  
58  
59  
60

For peer review only

**REFERENCES**

1. Carroll LJ, Cassidy JD, Holm L, et al. Methodological issues and research recommendations for mild traumatic brain injury: the WHO Collaborating Centre Task Force on Mild Traumatic Brain Injury. *J Rehabil Med* 2004;(43 Suppl):113-25.
2. The American Congress of Rehabilitation Medicine (ACRM). Definition of mild traumatic brain injury. *J Head Trauma Rehabil* 1993;8:86-87.  
[https://acrm.org/wpcontent/uploads/pdf/TBIDef\\_English\\_10-10.pdf](https://acrm.org/wpcontent/uploads/pdf/TBIDef_English_10-10.pdf)  
(accessed 05 jan. 2019).
3. Katz DI, Cohen SI, Alexander MP, Handbook of Clinical Neurology, Vol. 127 (3rd series) Traumatic Brain Injury, Part I, J. Grafman and A.M. Salazar, Editors, 2015: 129-242.
4. McCrory P, et al. Consensus statement on concussion in sport: the 4th International Conference on Concussion in Sport held in Zurich, November 2012. *Br J Sports Med* 2013;47:250–258.
5. Uden L, Calcagnile O, Uden J, et al. Validation of the Scandinavian guidelines for initial management of minimal, mild and moderate traumatic brain injury in adults. *BMC Med* 2015;13:292.
6. Levin HS, Diaz-Arrastia RR. Diagnosis, prognosis, and clinical management of mild traumatic brain injury. *Lancet Neurol* 2015;14:506-17.
7. van der Naalt J, Timmerman ME, de Koning ME, et al. Early predictors of outcome after mild traumatic brain injury (UPFRONT): an observational cohort study. *Lancet Neurol* 2017;16:532-40.
8. Cassidy JD, Carroll LJ, Peloso PM, et al. Incidence, risk factors and prevention of mild traumatic brain injury: results of the WHO Collaborating Centre Task Force on Mild Traumatic Brain Injury. *J Rehabil Med* 2004;(43 Suppl):28-60.

- 1  
2  
3  
4 9. Engberg AW, Teasdale TW. Epidemiology and treatment of head injuries in Denmark 1994-  
5 2002, illustrated with hospital statistics. *Ugeskr Laeger* 2007;169:199-203.  
6  
7
- 8  
9 10. Losoi H, Silverberg ND, Waljas M, et al. Recovery from Mild Traumatic Brain Injury in  
10 Previously Healthy Adults. *J Neurotrauma* 2016;33:766-76.  
11  
12
- 13 11. Dumke HA. Posttraumatic Headache and Its Impact on Return to Work After Mild  
14 Traumatic Brain Injury. *J Head Trauma Rehabil* 2017;32:E55-E65.  
15  
16
- 17 12. Ponsford J, Willmott C, Rothwell A, et al. Factors influencing outcome following mild  
18 traumatic brain injury in adults. *J Int Neuropsychol Soc* 2000;6:568-79.  
19  
20
- 21 13. Galili SF, Bech BH, Vestergaard C, et al. Use of general practice before and after mild  
22 traumatic brain injury: a nationwide population-based cohort study in Denmark. *BMJ Open*  
23 2017;7:e017735.  
24  
25
- 26 14. Rutherford WH, Merrett JD, McDonald JR. Symptoms at one year following concussion  
27 from minor head injuries. *Injury* 1979;10:225-30.  
28  
29
- 30 15. Rees PM. Contemporary issues in mild traumatic brain injury. *Arch Phys Med Rehabil*  
31 2003;84:1885-94.  
32  
33
- 34 16. Edna TH, Cappelen J. Late post-concussional symptoms in traumatic head injury. An  
35 analysis of frequency and risk factors. *Acta Neurochir (Wien)* 1987;86:12-7.  
36  
37
- 38 17. Ponsford J, Cameron P, Fitzgerald M, et al. Predictors of postconcussive symptoms 3  
39 months after mild traumatic brain injury. *Neuropsychology* 2012;26:304-13.  
40  
41
- 42 18. Vicki L. Kristman PC, Sheilah Hogg-Johnson, David Cassidy, et al. The Burden of Work  
43 Disability Associated with Mild Traumatic Brain Injury in Ontario Compensated Workers:  
44 A Prospective Cohort Study. *The Open Occupational Health & Safety Journal* 2010;2:1-8.  
45  
46
- 47 19. Waljas M, Iverson GL, Lange RT, et al. Return to work following mild traumatic brain  
48 injury. *J Head Trauma Rehabil* 2014;29:443-50.  
49  
50  
51  
52  
53  
54  
55  
56  
57  
58  
59  
60

- 1
- 2
- 3
- 4 20. Cancelliere C, Kristman VL, Cassidy JD, et al. Systematic review of return to work after
- 5 mild traumatic brain injury: results of the International Collaboration on Mild Traumatic
- 6 Brain Injury Prognosis. *Arch Phys Med Rehabil* 2014;95:S201-9.
- 7
- 8
- 9
- 10
- 11 21. Pransky G, Gatchel R, Linton SJ, et al. Improving return to work research. *J Occup Rehabil*
- 12 2005;15:453-7.
- 13
- 14
- 15
- 16 22. Young AE, Wasiak R, Roessler RT, et al. Return-to-work outcomes following work
- 17 disability: stakeholder motivations, interests and concerns. *J Occup Rehabil* 2005;15:543-
- 18 56.
- 19
- 20
- 21
- 22
- 23 23. Sveen U, Soberg HL, Ostensjo S. Biographical disruption, adjustment and reconstruction of
- 24 everyday occupations and work participation after mild traumatic brain injury. A focus
- 25 group study. *Disabil Rehabil* 2016;38:2296-304.
- 26
- 27
- 28
- 29
- 30 24. Friedland JF, Dawson DR. Function after motor vehicle accidents: a prospective study of
- 31 mild head injury and posttraumatic stress. *J Nerv Ment Dis* 2001;189:426-34.
- 32
- 33
- 34 25. Mani K, Cater B, Hudlikar A. Cognition and return to work after mild/moderate traumatic
- 35 brain injury: A systematic review. *Work* 2017;58:51-62.
- 36
- 37
- 38
- 39 26. Pedersen CB. The Danish Civil Registration System. *Scand J Public Health* 2011;39:22-5.
- 40
- 41 27. Lyngge E, Sandegaard JL, Rebolj M. The Danish National Patient Register. *Scand J Public*
- 42 *Health* 2011;39:30-3.
- 43
- 44
- 45 28. Beskæftigelsesministeriet [The Ministry of Employment]. Bekendtgørelse om
- 46 efterlønsbevis, udskydelsesreglen og skattefri præmie m.v. BEK nr 4 af 02/01/2017
- 47 Gældende. <https://www.retsinformation.dk/forms/R0710.aspx?id=186130>. (accessed 8 aug
- 48 2018)
- 49
- 50
- 51
- 52
- 53
- 54
- 55 29. Noonan VK, Thorogood NP, Fingas M, et al. The validity of administrative data to classify
- 56 patients with spinal column and cord injuries. *J Neurotrauma* 2013;30:173-80.
- 57
- 58
- 59
- 60

- 1  
2  
3  
4 30. National Center for Injury Prevention and Control. Report to Congress on Mild Traumatic  
5 Brain Injury in the United States: Steps to prevent a Serious Public Health Problem. 2003.  
6  
7 <https://www.cdc.gov/traumaticbraininjury/pdf/mtbireport-a.pdf>. (accessed 8 aug 2018)  
8  
9
- 10  
11 31. Cassidy JD, Cancelliere C, Carroll LJ, et al. Systematic review of self-reported prognosis in  
12 adults after mild traumatic brain injury: results of the International Collaboration on Mild  
13 Traumatic Brain Injury Prognosis. *Arch Phys Med Rehabil* 2014;95:S132-51.  
14  
15
- 16 32. Styrelsen for Arbejdsmarked og Rekruttering [Danish Agency for Labour Market and  
17 Recruitment] . DREAM version 41. 2018. [https://www.dst.dk/-/media/Kontorer/13-](https://www.dst.dk/-/media/Kontorer/13-Forskning-og-Metode/DREAM-koder-version-41.docx?la=da)  
18 [Forskning-og-Metode/DREAM-koder-version-41.docx?la=da](https://www.dst.dk/-/media/Kontorer/13-Forskning-og-Metode/DREAM-koder-version-41.docx?la=da). (accessed 8 aug 2018)  
19  
20  
21  
22  
23  
24
- 25 33. Beskæftigelsesministeriet [The Ministry of Employment]. Bekendtgørelse af lov om  
26 sygedagpenge. 2010/1 LSF 68. <http://www.retsinformation.dk/eli/ft/201012L00068>.  
27  
28 (accessed 03 jan. 2019).  
29  
30
- 31 34. Beskæftigelsesministeriet [The Ministry of Employment]. Bekendtgørelse af lov om  
32 sygedagpenge. LBK nr 653 af 26/06/2012 Historisk.  
33  
34 <https://www.retsinformation.dk/Forms/R0710.aspx?id=142423#Afs6>. (accessed 03 jan.  
35 2019).  
36  
37  
38  
39
- 40 35. Beskæftigelsesministeriet [The Ministry of Employment]. Bekendtgørelse af lov om en  
41 aktiv beskæftigelsesindsats. LBK nr 685 af 29/06/2005 Historisk.  
42  
43 <https://www.retsinformation.dk/Forms/R0710.aspx?id=30223>. (accessed 03 jan. 2019).  
44  
45  
46  
47
- 48 36. Beskæftigelsesministeriet [The Ministry of Employment]. Bekendtgørelse af lov om social  
49 pension. LBK nr 783 af 09/07/2012.  
50  
51 <https://www.retsinformation.dk/Forms/R0710.aspx?id=142132>. (accessed 03 jan. 2019).  
52  
53  
54  
55  
56  
57  
58  
59  
60

- 1  
2  
3  
4 37. Ministry for Economic Affairs and the Interior. Structural reform 2007.  
5  
6 <http://english.oim.dk/responsibilities-of-the-ministry/economics-of-municipalities-and->  
7  
8 [regions/structural-reform/](http://english.oim.dk/responsibilities-of-the-ministry/economics-of-municipalities-and-).  
9  
10  
11 38. Hannerz H, Mortensen OS, Poulsen OM, et al. Time trend analysis of return to work after  
12  
13 stroke in Denmark 1996-2006. *Int J Occup Med Environ Health* 2012;25:200-4.  
14  
15 39. Rao DP, McFaul S, Thompson W, et al. Trends in self-reported traumatic brain injury  
16  
17 among Canadians, 2005-2014: a repeated cross-sectional analysis. *CMAJ Open*  
18  
19 2017;5:E301-E07.  
20  
21  
22 40. Baadsgaard M, Quitzau J. Danish registers on personal income and transfer payments.  
23  
24 *Scand J Public Health* 2011;39:103-5.  
25  
26 41. Jensen VM, Rasmussen AW. Danish Education Registers. *Scand J Public Health*  
27  
28 2011;39:91-4.  
29  
30  
31 42. Statistics Denmark. Households, Families and Children. Secondary Households, Families  
32  
33 and Children 2017.  
34  
35 <http://www.dst.dk/en/Statistik/dokumentation/documentationofstatistics/households-->  
36  
37 [families-and-children.](http://www.dst.dk/en/Statistik/dokumentation/documentationofstatistics/households--)  
38  
39  
40 43. Thygesen SK, Christiansen CF, Christensen S, et al. The predictive value of ICD-10  
41  
42 diagnostic coding used to assess Charlson comorbidity index conditions in the population-  
43  
44 based Danish National Registry of Patients. *BMC Med Res Methodol* 2011;11:83.  
45  
46  
47 44. Charlson ME, Pompei P, Ales KL, et al. A new method of classifying prognostic  
48  
49 comorbidity in longitudinal studies: development and validation. *J Chronic Dis*  
50  
51 1987;40:373-83.  
52  
53  
54  
55  
56  
57  
58  
59  
60



- 1  
2  
3  
4 45. Pedersen P, Lund T, Lindholdt L, et al. Labour market trajectories following sickness  
5 absence due to self-reported all cause morbidity-a longitudinal study. *BMC Public Health*  
6 2016;16:337.  
7  
8
- 9  
10  
11 46. Carroll LJ, Cassidy JD, Cancelliere C, et al. Systematic review of the prognosis after mild  
12 traumatic brain injury in adults: cognitive, psychiatric, and mortality outcomes: results of the  
13 International Collaboration on Mild Traumatic Brain Injury Prognosis. *Arch Phys Med*  
14 *Rehabil* 2014;95:S152-73.  
15  
16
- 17  
18  
19 47. Stulemeijer M, van der Werf S, Borm GF, et al. Early prediction of favourable recovery 6  
20 months after mild traumatic brain injury. *J Neurol Neurosurg Psychiatry* 2008;79:936-42.  
21  
22
- 23  
24  
25 48. de Koning ME, Scheenen ME, van der Horn HJ, et al. Prediction of work resumption and  
26 sustainability up to 1 year after mild traumatic brain injury. *Neurology* 2017;89:1908-14.  
27  
28
- 29  
30  
31 49. Steenstra IA, Lee H, de Vroome EM, et al. Comparing current definitions of return to work:  
32 a measurement approach. *J Occup Rehabil* 2012;22:394-400.  
33  
34
- 35  
36  
37 50. Theadom A, Barker-Collo S, Jones K, et al. Work Limitations 4 Years After Mild Traumatic  
38 Brain Injury: A Cohort Study. *Arch Phys Med Rehabil* 2017;98:1560-66.  
39  
40
- 41  
42  
43 51. Lund T, Kivimaki M, Labriola M, et al. Using administrative sickness absence data as a  
44 marker of future disability pension: the prospective DREAM study of Danish private sector  
45 employees. *Occup Environ Med* 2008;65:28-31.  
46  
47
- 48  
49  
50 52. Selassie AW, Fakhry SM, Ford DW. Population-based study of the risk of in-hospital death  
51 after traumatic brain injury: the role of sepsis. *J Trauma* 2011;71:1226-34.  
52  
53
- 54  
55  
56 53. Pentland B, Hutton LS, Jones PA. Late mortality after head injury. *J Neurol Neurosurg*  
57 *Psychiatry* 2005;76:395-400.  
58  
59
- 60  
54. Madsen T, Erlangsen A, Orlovskaya S, et al. Association Between Traumatic Brain Injury and  
Risk of Suicide. *JAMA*. 2018;320:580-588.

1  
2  
3  
4  
5  
6  
7  
8  
9  
10  
11  
12  
13  
14  
15  
16  
17  
18  
19  
20  
21  
22  
23  
24  
25  
26  
27  
28  
29  
30  
31  
32  
33  
34  
35  
36  
37  
38  
39  
40  
41  
42  
43  
44  
45  
46  
47  
48  
49  
50  
51  
52  
53  
54  
55  
56  
57  
58  
59  
60

55. Stapelfeldt CM, Jensen C, Andersen NT, et al. Validation of sick leave measures: self-reported sick leave and sickness benefit data from a Danish national register compared to multiple workplace-registered sick leave spells in a Danish municipality. *BMC Public Health* 2012;12:661.
56. Chen AY, Colantonio A. Defining neurotrauma in administrative data using the International Classification of Diseases Tenth Revision. *Emerg Themes Epidemiol* 2011;8:4.
57. Mannix R, O'Brien MJ, Meehan WP, 3rd. The epidemiology of outpatient visits for minor head injury: 2005 to 2009. *Neurosurgery* 2013;73:129-34
58. Kristman VL, Borg J, Godbolt AK, et al. Methodological issues and research recommendations for prognosis after mild traumatic brain injury: results of the International Collaboration on Mild Traumatic Brain Injury Prognosis. *Arch Phys Med Rehabil* 2014;95:S265-77.
59. van der Naalt J, van Zomeren AH, Sluiter WJ, et al. One year outcome in mild to moderate head injury: the predictive value of acute injury characteristics related to complaints and return to work. *J Neurol Neurosurg Psychiatry* 1999;66:207-13.

1  
2  
3  
4 Figure 1. Description of social transfer payments as part of the Danish welfare system. Categories  
5 describe unavailable for the labour market (an exclusion criterion) (EX), the primary outcome (1)  
6  
7 and the secondary outcomes (2-5) in terms of the different social transfer payments and other social  
8  
9 conditions (first row) that are included in each.  
10  
11  
12

13  
14 Figure 2. Inclusion of the study population  
15  
16

17 Figure 3. Prevalence and adjusted odds of not attending ordinary work at the index date and up to 5  
18  
19 years after concussion  
20  
21  
22  
23  
24  
25  
26  
27  
28  
29  
30  
31  
32  
33  
34  
35  
36  
37  
38  
39  
40  
41  
42  
43  
44  
45  
46  
47  
48  
49  
50  
51  
52  
53  
54  
55  
56  
57  
58  
59  
60

1  
2  
3  
4  
5  
6  
7  
8  
9  
10  
11  
12  
13  
14  
15  
16  
17  
18  
19  
20  
21  
22  
23  
24  
25  
26  
27  
28  
29  
30  
31  
32  
33  
34  
35  
36  
37  
38  
39  
40  
41

**Figure 1.** Description of social transfer payments as part of the Danish welfare system. Categories describe unavailable for the labour market (an exclusion criterion) (EX), the primary outcome (1) and the secondary outcomes (2-5) in terms of the different social transfer payments and other social conditions (first row) that are included in each.



\* EX is the exclusion criterion "Unavailable for the labour market", assessed at one week before the trauma.

**Figure 2.** Inclusion of the study population



**Figure 3.** Prevalence and adjusted odds of not attending ordinary work at the index date and up to 5 years after concussion



STROBE Statement—Checklist of items that should be included in reports of *cohort studies*

|                              | Item No | Recommendation                                                                                                                                                                                                                                                                                                         | Page No     |
|------------------------------|---------|------------------------------------------------------------------------------------------------------------------------------------------------------------------------------------------------------------------------------------------------------------------------------------------------------------------------|-------------|
| <b>Title and abstract</b>    | 1       | (a) Indicate the study's design with a commonly used term in the title or the abstract<br>(b) Provide in the abstract an informative and balanced summary of what was done and what was found                                                                                                                          | 1, 3<br>3-4 |
| <b>Introduction</b>          |         |                                                                                                                                                                                                                                                                                                                        |             |
| Background/rationale         | 2       | Explain the scientific background and rationale for the investigation being reported                                                                                                                                                                                                                                   | 6-7         |
| Objectives                   | 3       | State specific objectives, including any prespecified hypotheses                                                                                                                                                                                                                                                       | 7           |
| <b>Methods</b>               |         |                                                                                                                                                                                                                                                                                                                        |             |
| Study design                 | 4       | Present key elements of study design early in the paper                                                                                                                                                                                                                                                                | 3, 7        |
| Setting                      | 5       | Describe the setting, locations, and relevant dates, including periods of recruitment, exposure, follow-up, and data collection                                                                                                                                                                                        | 7-8         |
| Participants                 | 6       | (a) Give the eligibility criteria, and the sources and methods of selection of participants. Describe methods of follow-up<br>(b) For matched studies, give matching criteria and number of exposed and unexposed                                                                                                      | 7-9         |
| Variables                    | 7       | Clearly define all outcomes, exposures, predictors, potential confounders, and effect modifiers. Give diagnostic criteria, if applicable                                                                                                                                                                               | 9-13        |
| Data sources/<br>measurement | 8*      | For each variable of interest, give sources of data and details of methods of assessment (measurement). Describe comparability of assessment methods if there is more than one group                                                                                                                                   | 8-11        |
| Bias                         | 9       | Describe any efforts to address potential sources of bias                                                                                                                                                                                                                                                              | 7, 20       |
| Study size                   | 10      | Explain how the study size was arrived at                                                                                                                                                                                                                                                                              | 7, 8,<br>13 |
| Quantitative variables       | 11      | Explain how quantitative variables were handled in the analyses. If applicable, describe which groupings were chosen and why                                                                                                                                                                                           | 11,<br>12   |
| Statistical methods          | 12      | (a) Describe all statistical methods, including those used to control for confounding<br>(b) Describe any methods used to examine subgroups and interactions<br>(c) Explain how missing data were addressed<br>(d) If applicable, explain how loss to follow-up was addressed<br>(e) Describe any sensitivity analyses | 12,<br>13   |
| <b>Results</b>               |         |                                                                                                                                                                                                                                                                                                                        |             |
| Participants                 | 13*     | (a) Report numbers of individuals at each stage of study—eg numbers potentially eligible, examined for eligibility, confirmed eligible, included in the study, completing follow-up, and analysed<br>(b) Give reasons for non-participation at each stage<br>(c) Consider use of a flow diagram                        | 13-<br>14   |
| Descriptive data             | 14*     | (a) Give characteristics of study participants (eg demographic, clinical, social) and information on exposures and potential confounders<br>(b) Indicate number of participants with missing data for each variable of interest<br>(c) Summarise follow-up time (eg, average and total amount)                         | 13-<br>15   |
| Outcome data                 | 15*     | Report numbers of outcome events or summary measures over time                                                                                                                                                                                                                                                         | 15-<br>17   |

|    |                          |    |                                                                                                                                                                                                              |       |
|----|--------------------------|----|--------------------------------------------------------------------------------------------------------------------------------------------------------------------------------------------------------------|-------|
| 1  | Main results             | 16 | (a) Give unadjusted estimates and, if applicable, confounder-adjusted estimates and their precision (eg, 95% confidence interval). Make clear which confounders were adjusted for and why they were included | 15-17 |
| 2  |                          |    | (b) Report category boundaries when continuous variables were categorized                                                                                                                                    |       |
| 3  |                          |    | (c) If relevant, consider translating estimates of relative risk into absolute risk for a meaningful time period                                                                                             |       |
| 4  |                          |    |                                                                                                                                                                                                              |       |
| 5  |                          |    |                                                                                                                                                                                                              |       |
| 6  |                          |    |                                                                                                                                                                                                              |       |
| 7  |                          |    |                                                                                                                                                                                                              |       |
| 8  | Other analyses           | 17 | Report other analyses done—eg analyses of subgroups and interactions, and sensitivity analyses                                                                                                               | -     |
| 9  |                          |    |                                                                                                                                                                                                              |       |
| 10 | <b>Discussion</b>        |    |                                                                                                                                                                                                              |       |
| 11 |                          |    |                                                                                                                                                                                                              |       |
| 12 | Key results              | 18 | Summarise key results with reference to study objectives                                                                                                                                                     | 17-20 |
| 13 |                          |    |                                                                                                                                                                                                              |       |
| 14 | Limitations              | 19 | Discuss limitations of the study, taking into account sources of potential bias or imprecision. Discuss both direction and magnitude of any potential bias                                                   | 20    |
| 15 |                          |    |                                                                                                                                                                                                              |       |
| 16 | Interpretation           | 20 | Give a cautious overall interpretation of results considering objectives, limitations, multiplicity of analyses, results from similar studies, and other relevant evidence                                   | 17-20 |
| 17 |                          |    |                                                                                                                                                                                                              |       |
| 18 | Generalisability         | 21 | Discuss the generalisability (external validity) of the study results                                                                                                                                        | 20    |
| 19 |                          |    |                                                                                                                                                                                                              |       |
| 20 | <b>Other information</b> |    |                                                                                                                                                                                                              |       |
| 21 | Funding                  | 22 | Give the source of funding and the role of the funders for the present study and, if applicable, for the original study on which the present article is based                                                | 22    |
| 22 |                          |    |                                                                                                                                                                                                              |       |
| 23 |                          |    |                                                                                                                                                                                                              |       |

\*Give information separately for exposed and unexposed groups.

**Note:** An Explanation and Elaboration article discusses each checklist item and gives methodological background and published examples of transparent reporting. The STROBE checklist is best used in conjunction with this article (freely available on the Web sites of PLoS Medicine at <http://www.plosmedicine.org/>, Annals of Internal Medicine at <http://www.annals.org/>, and Epidemiology at <http://www.epidem.com/>). Information on the STROBE Initiative is available at <http://www.strobe-statement.org>.
